# Supplementary material for: Burden Analysis of Rare Microdeletions Suggests a Strong Impact of Neurodevelopmental Genes in Genetic Generalised Epilepsies
Source: PubMed Central journal article supplement (PMC4423931; doi:10.1371/journal.pgen.1005226), 2015-05-07

| Sample-ID | GGE Syndrome | Chr | Start    | End      | Candidate gene |
|-----------|--------------|-----|----------|----------|----------------|
| EC-CAE428 | 6/CAE,gsw    | 1   | 97005643 | 97712686 | DPYD           |

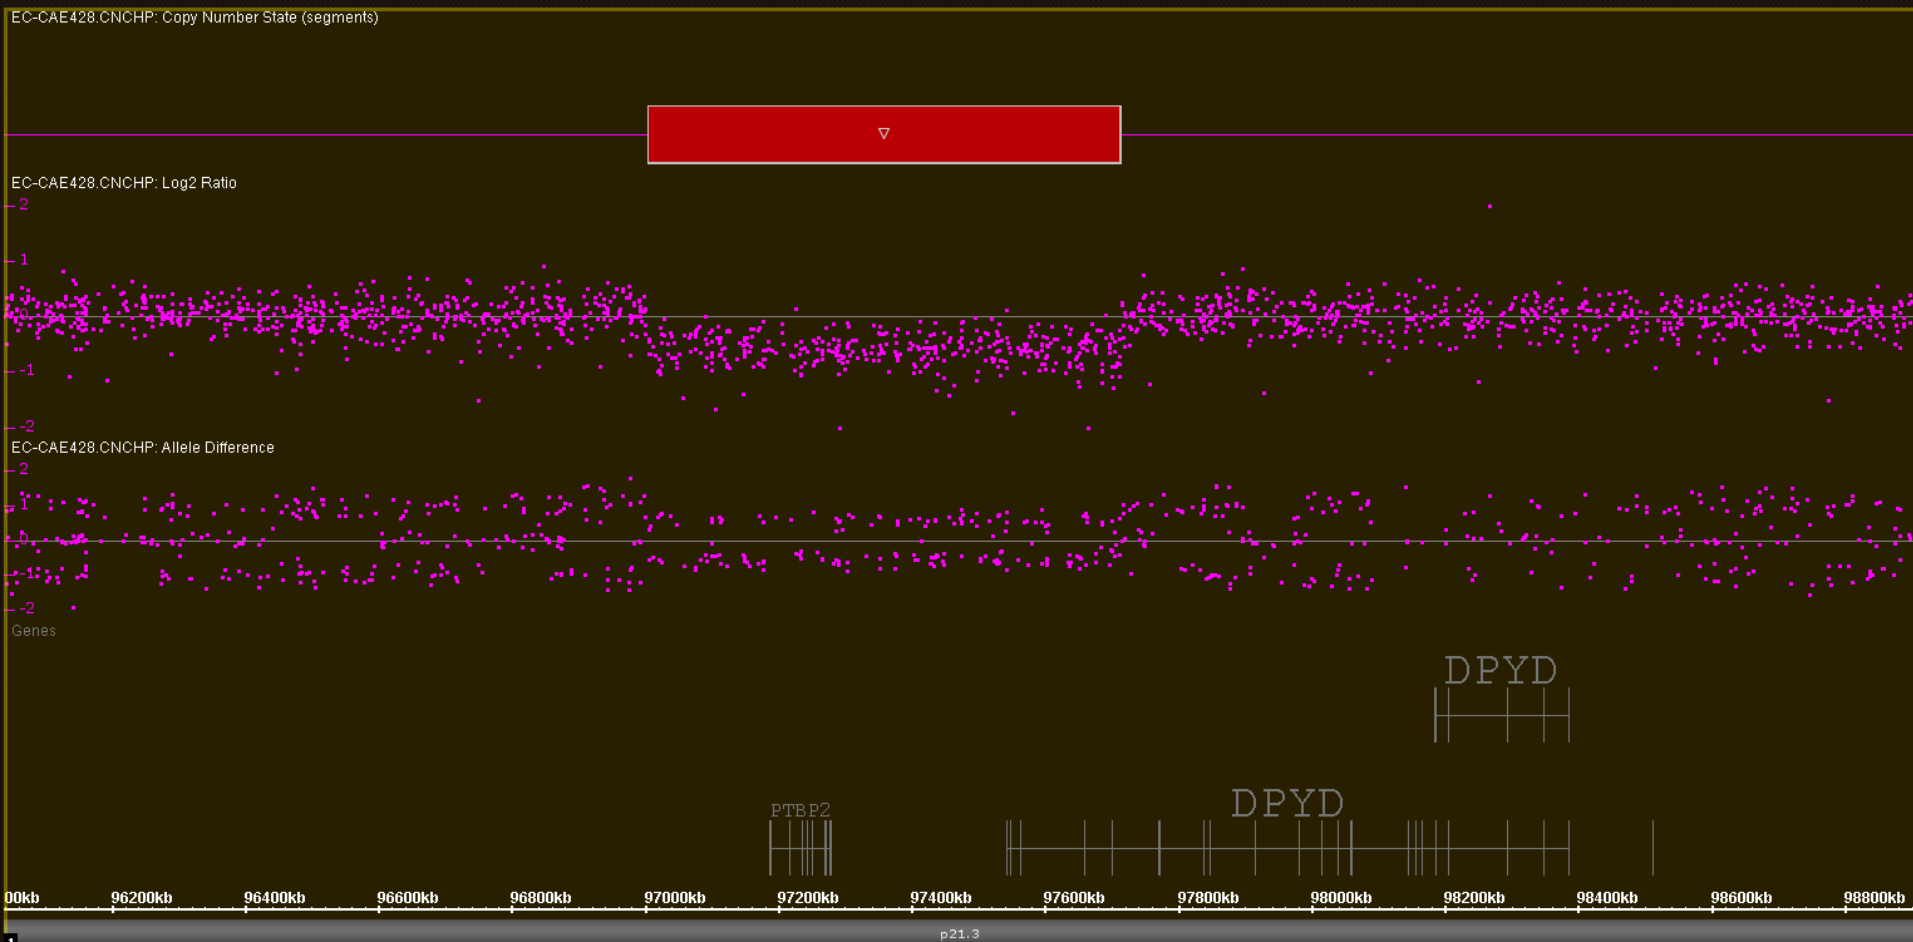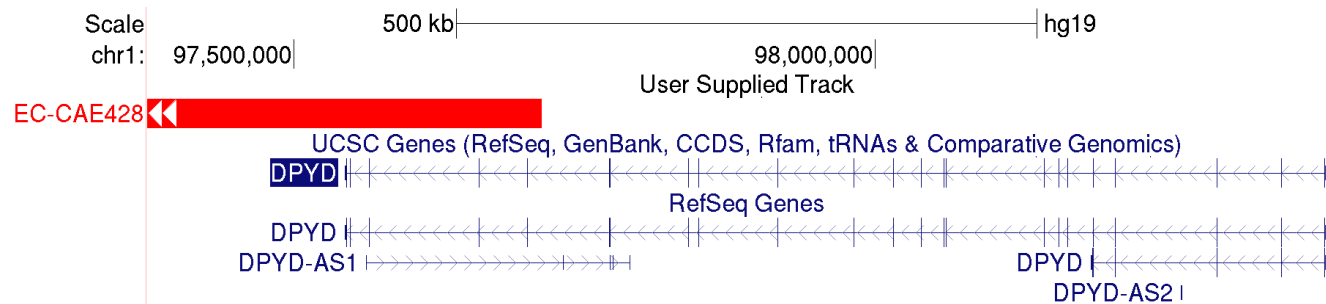

| Sample-ID   | GGE Syndrome | Chr | Start     | End       | Candidate gene          |
|-------------|--------------|-----|-----------|-----------|-------------------------|
| EC-EGTCS014 | 14/EGTCS,gsu | 1   | 110606081 | 111393713 | <i>KCNA2,ALX3,RBM15</i> |

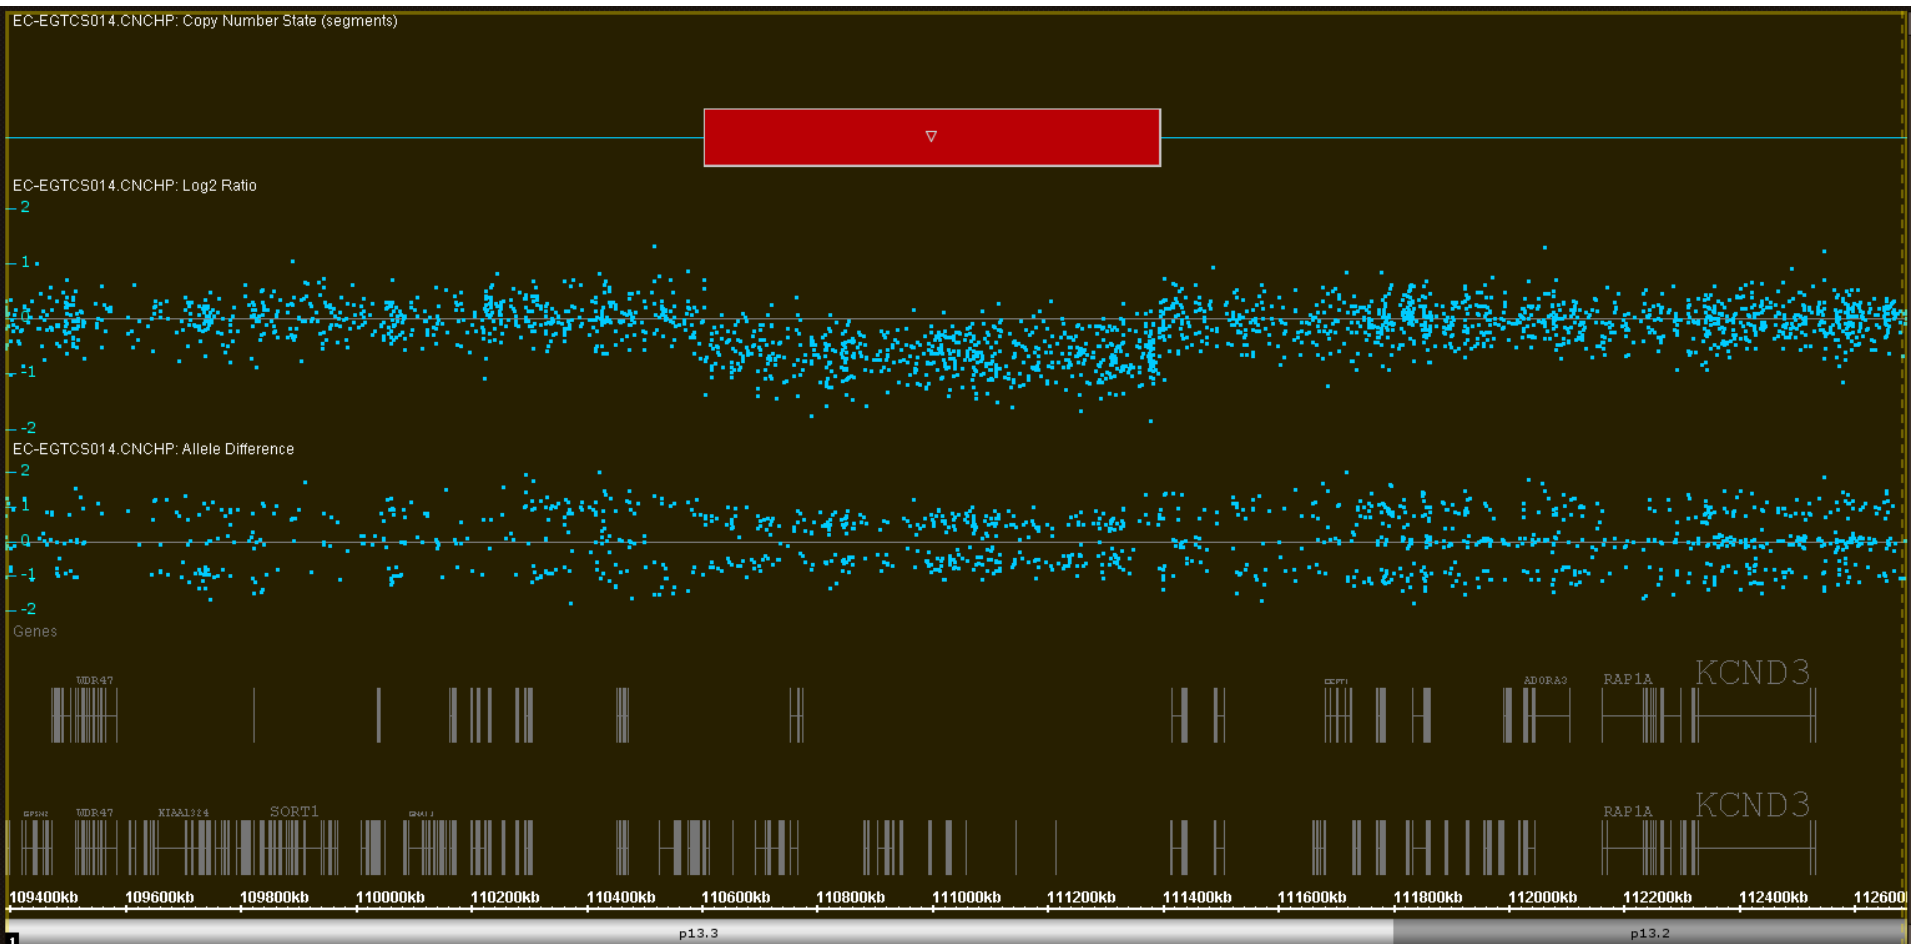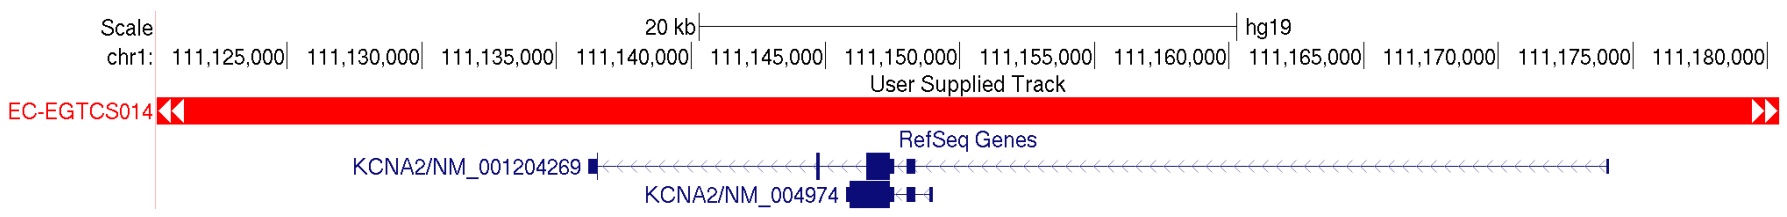

| Sample-ID | GGE Syndrome | Chr | Start    | End      | Candidate gene |
|-----------|--------------|-----|----------|----------|----------------|
| EC-CAE333 | 5/CAE,gsw    | 2   | 50979977 | 51453231 | <i>NRXN1</i>   |

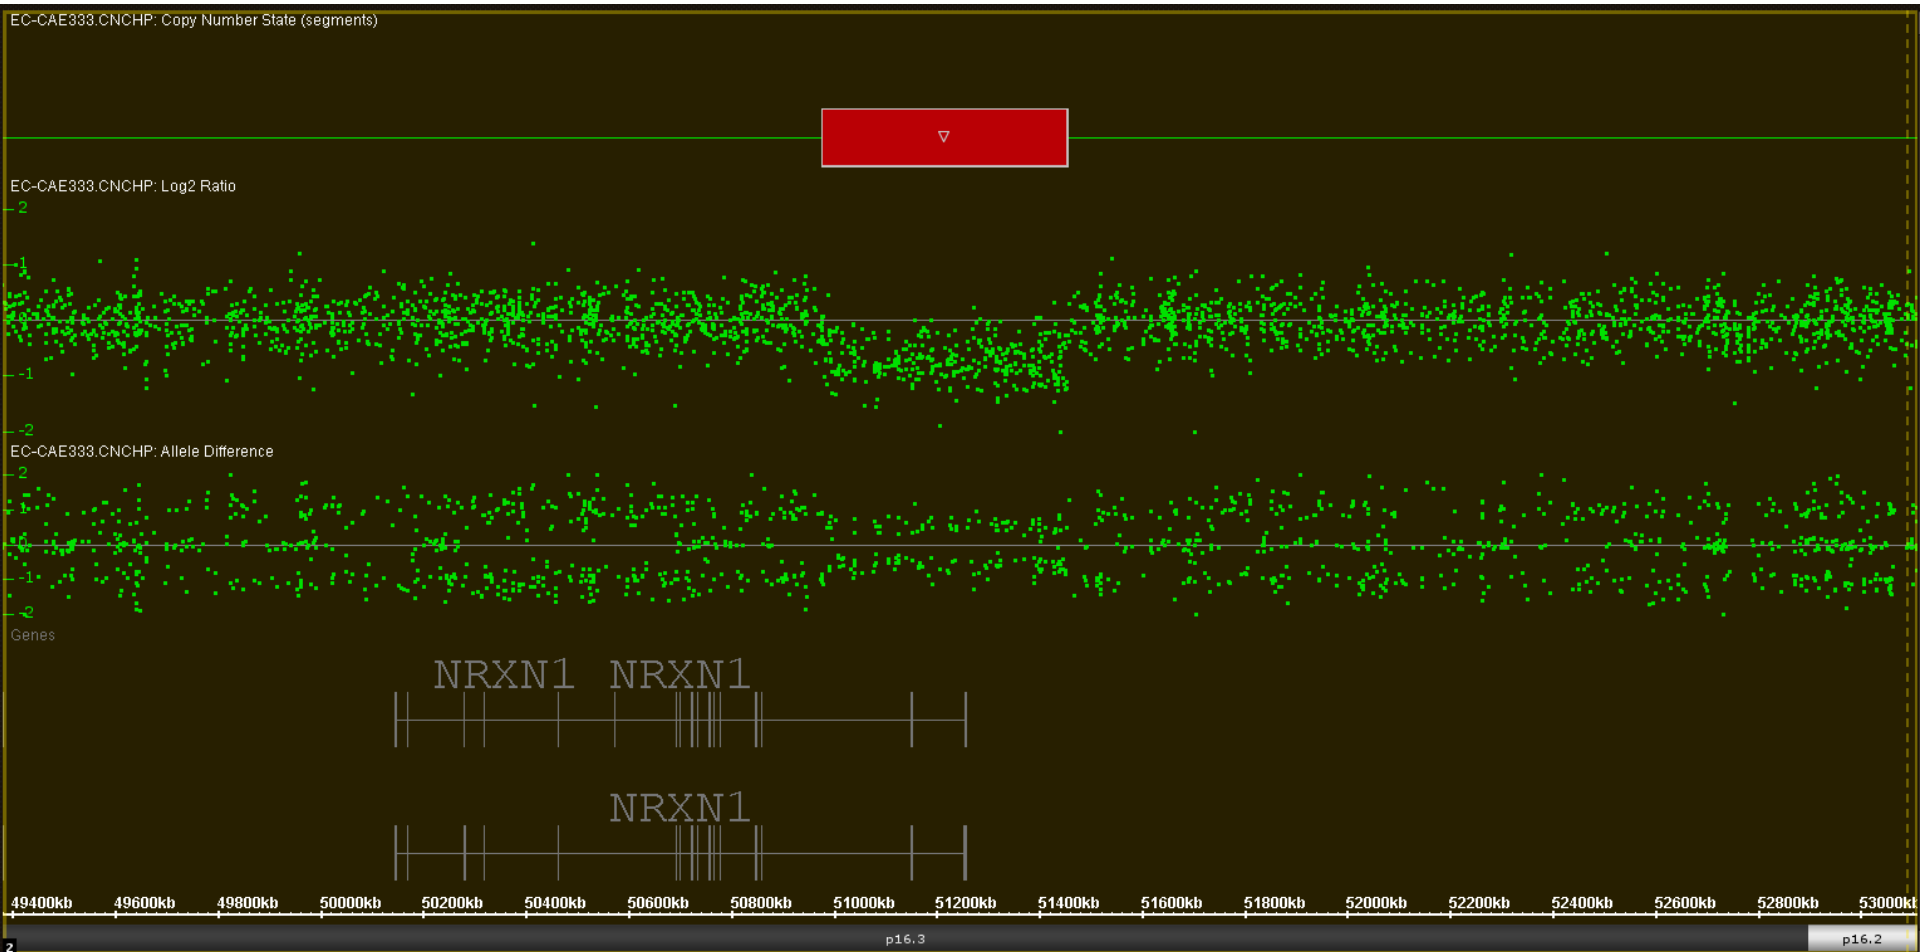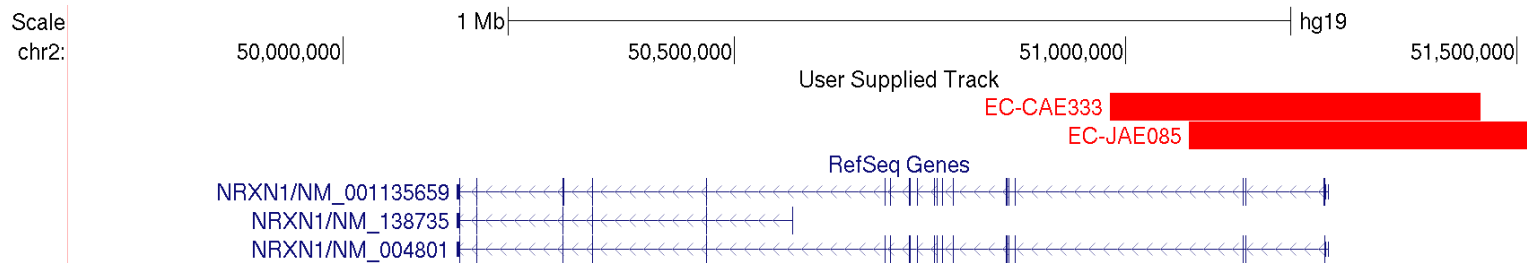

| Sample-ID | GGE Syndrome | Chr | Start    | End      | Candidate gene      |
|-----------|--------------|-----|----------|----------|---------------------|
| EC-JAE085 | 12/JAE,gsu   | 2   | 51080429 | 51682854 | <b><i>NRXN1</i></b> |

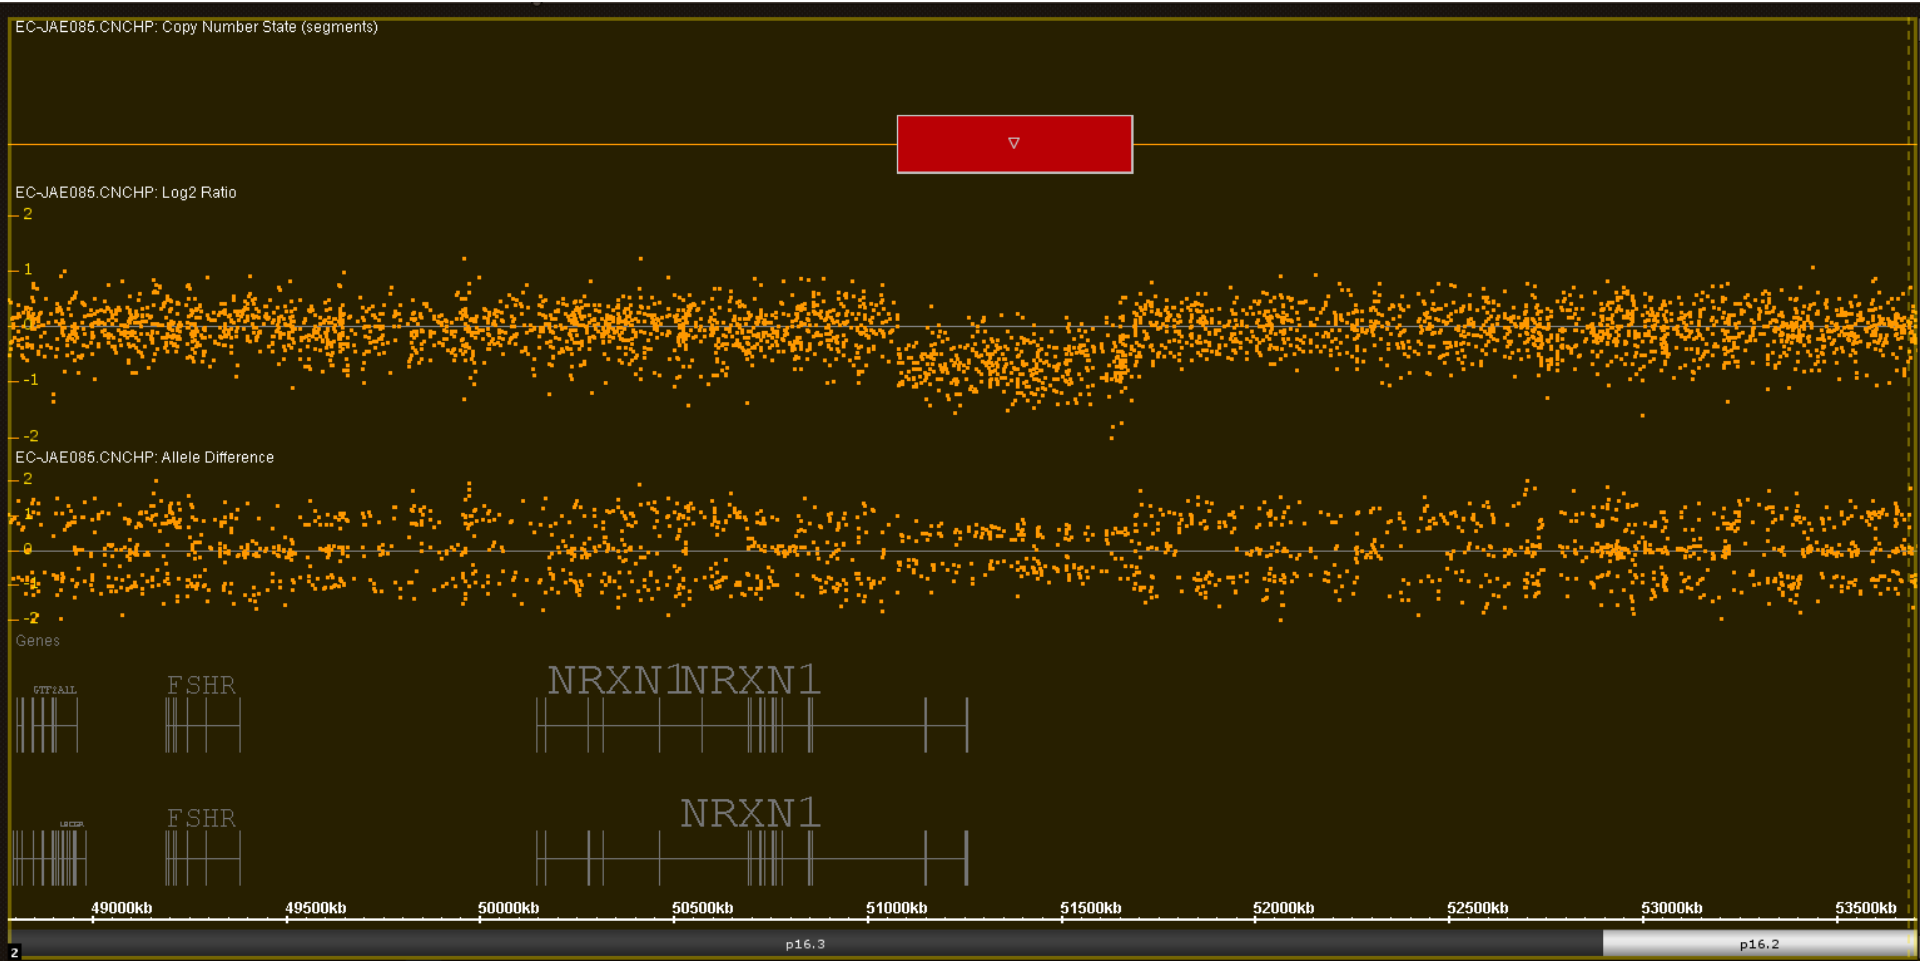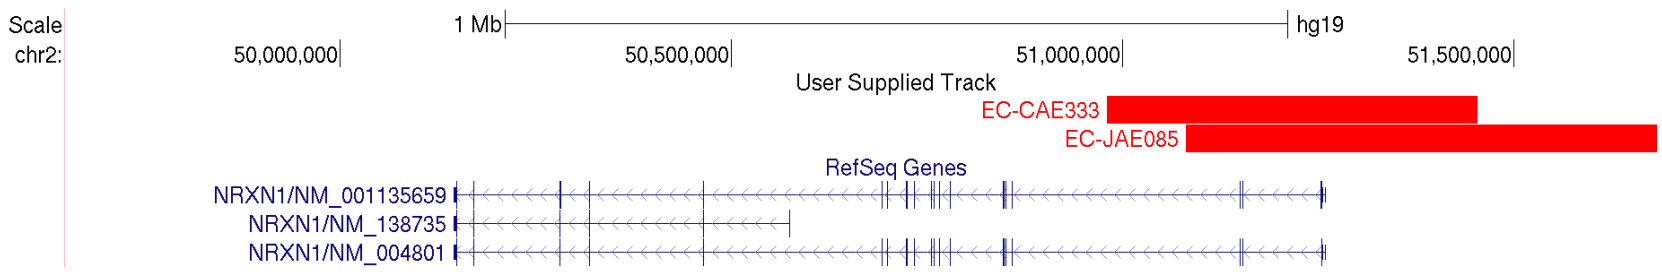

| Sample-ID | GGE Syndrome | Chr | Start     | End       | Candidate gene |
|-----------|--------------|-----|-----------|-----------|----------------|
| EC-JME399 | 13/JME,gsu   | 2   | 130275170 | 130762880 | RAB6C          |

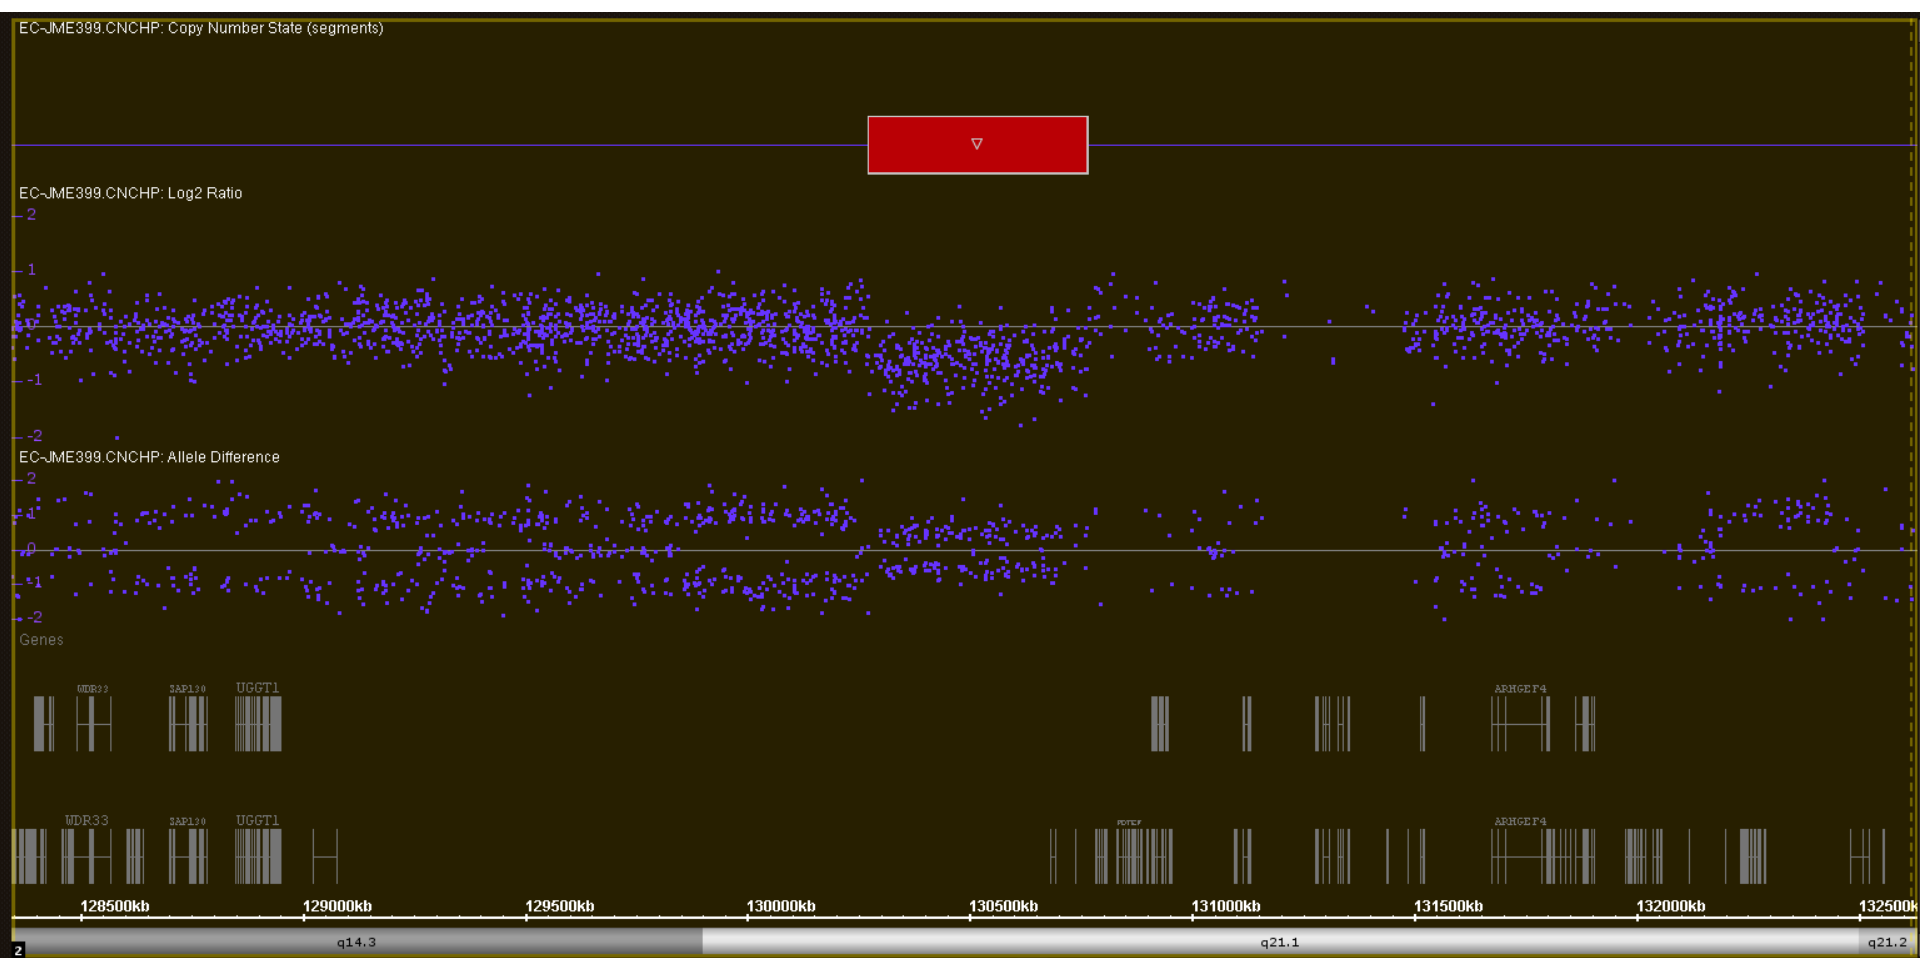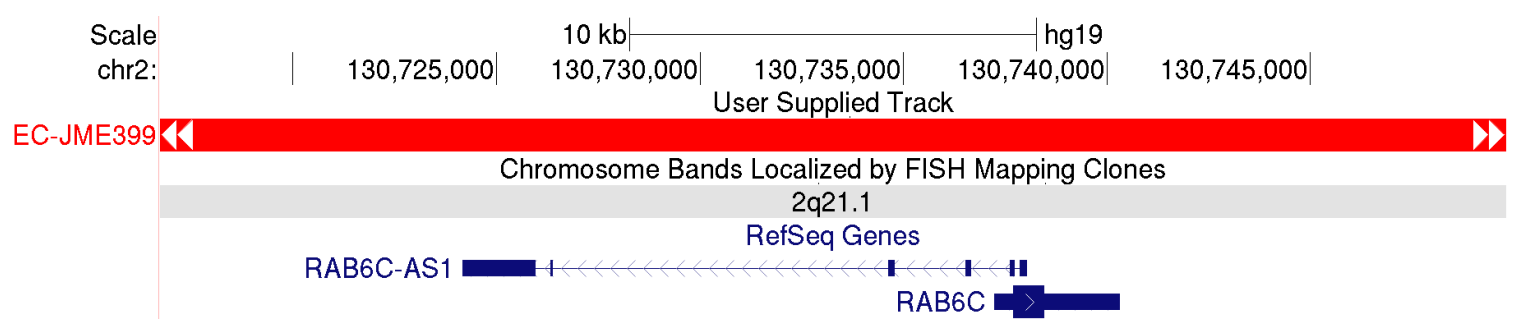

| Sample-ID | GGE Syndrome | Chr | Start    | End      | Candidate gene |
|-----------|--------------|-----|----------|----------|----------------|
| EC-JME104 | 13/JME,gsu   | 3   | 85017098 | 85603757 | CADM2          |

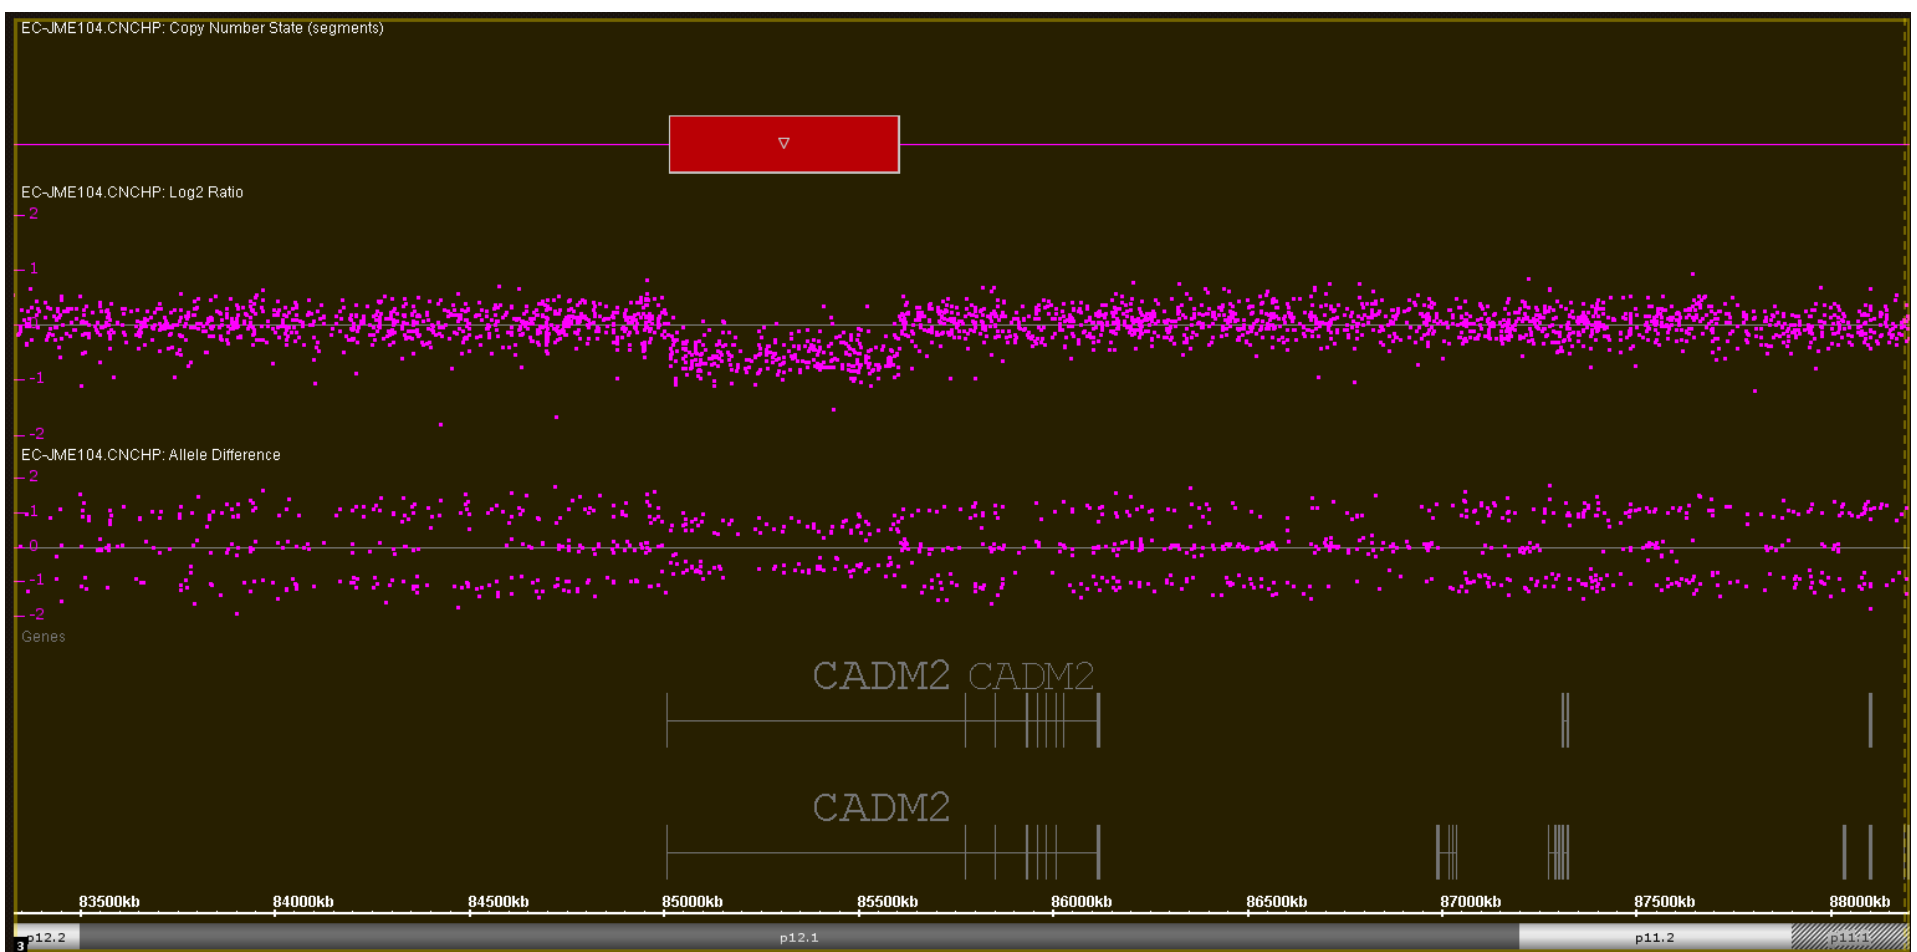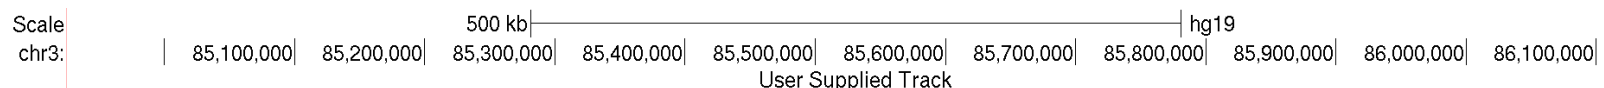

EC-JME104

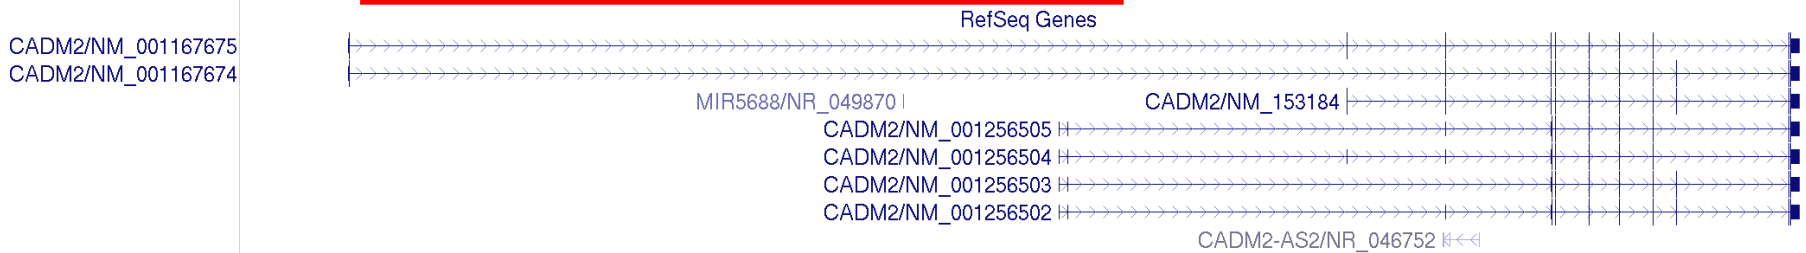

| Sample-ID | GGE Syndrome | Chr | Start     | End       | Candidate gene |
|-----------|--------------|-----|-----------|-----------|----------------|
| EC-CAE040 | 7/CAE,gsu    | 3   | 165317672 | 166886252 | BCHE           |

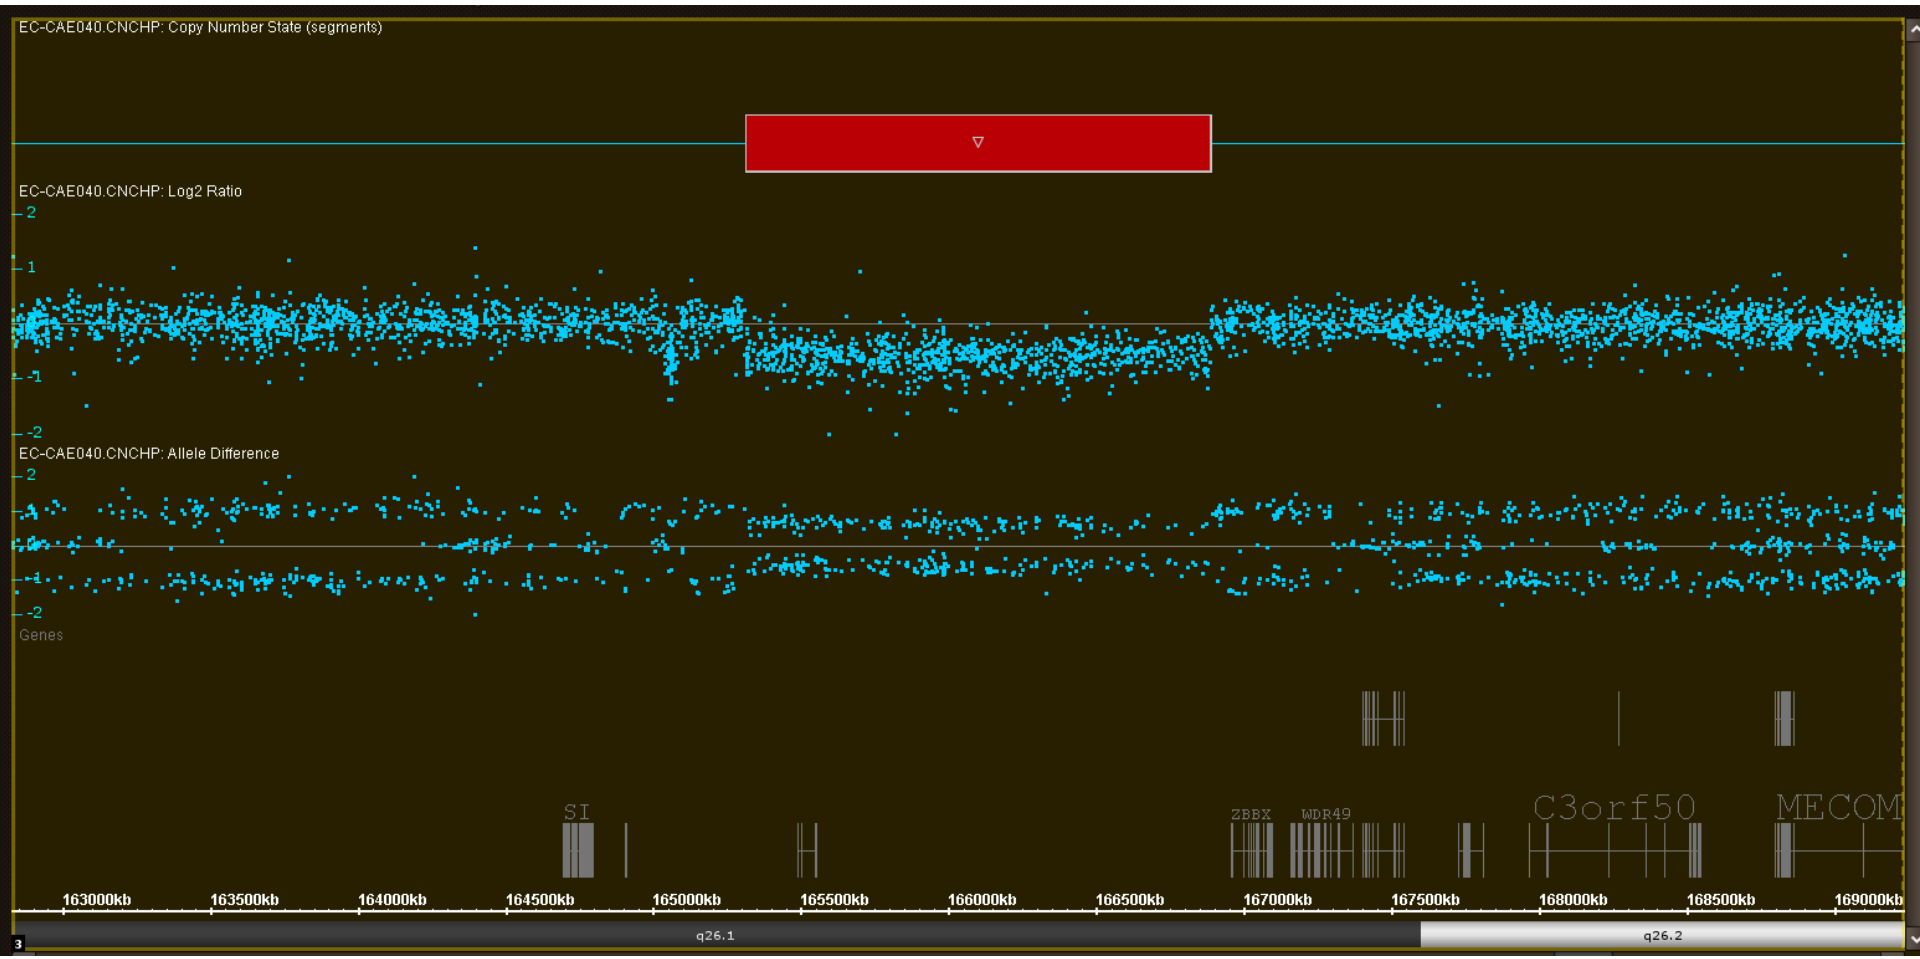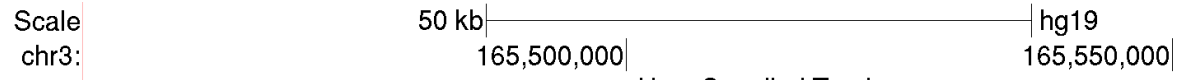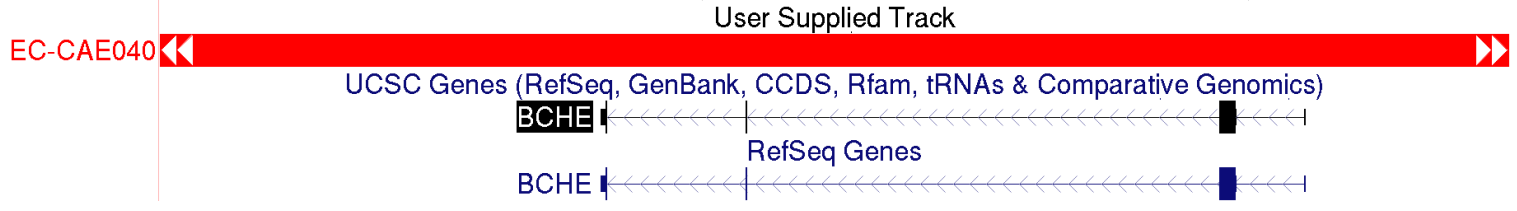

| Sample-ID | GGE Syndrome | Chr | Start    | End      | Candidate gene |
|-----------|--------------|-----|----------|----------|----------------|
| EC-JME445 | 26/JME       | 4   | 27778687 | 31233363 | <i>PCDH7</i>   |

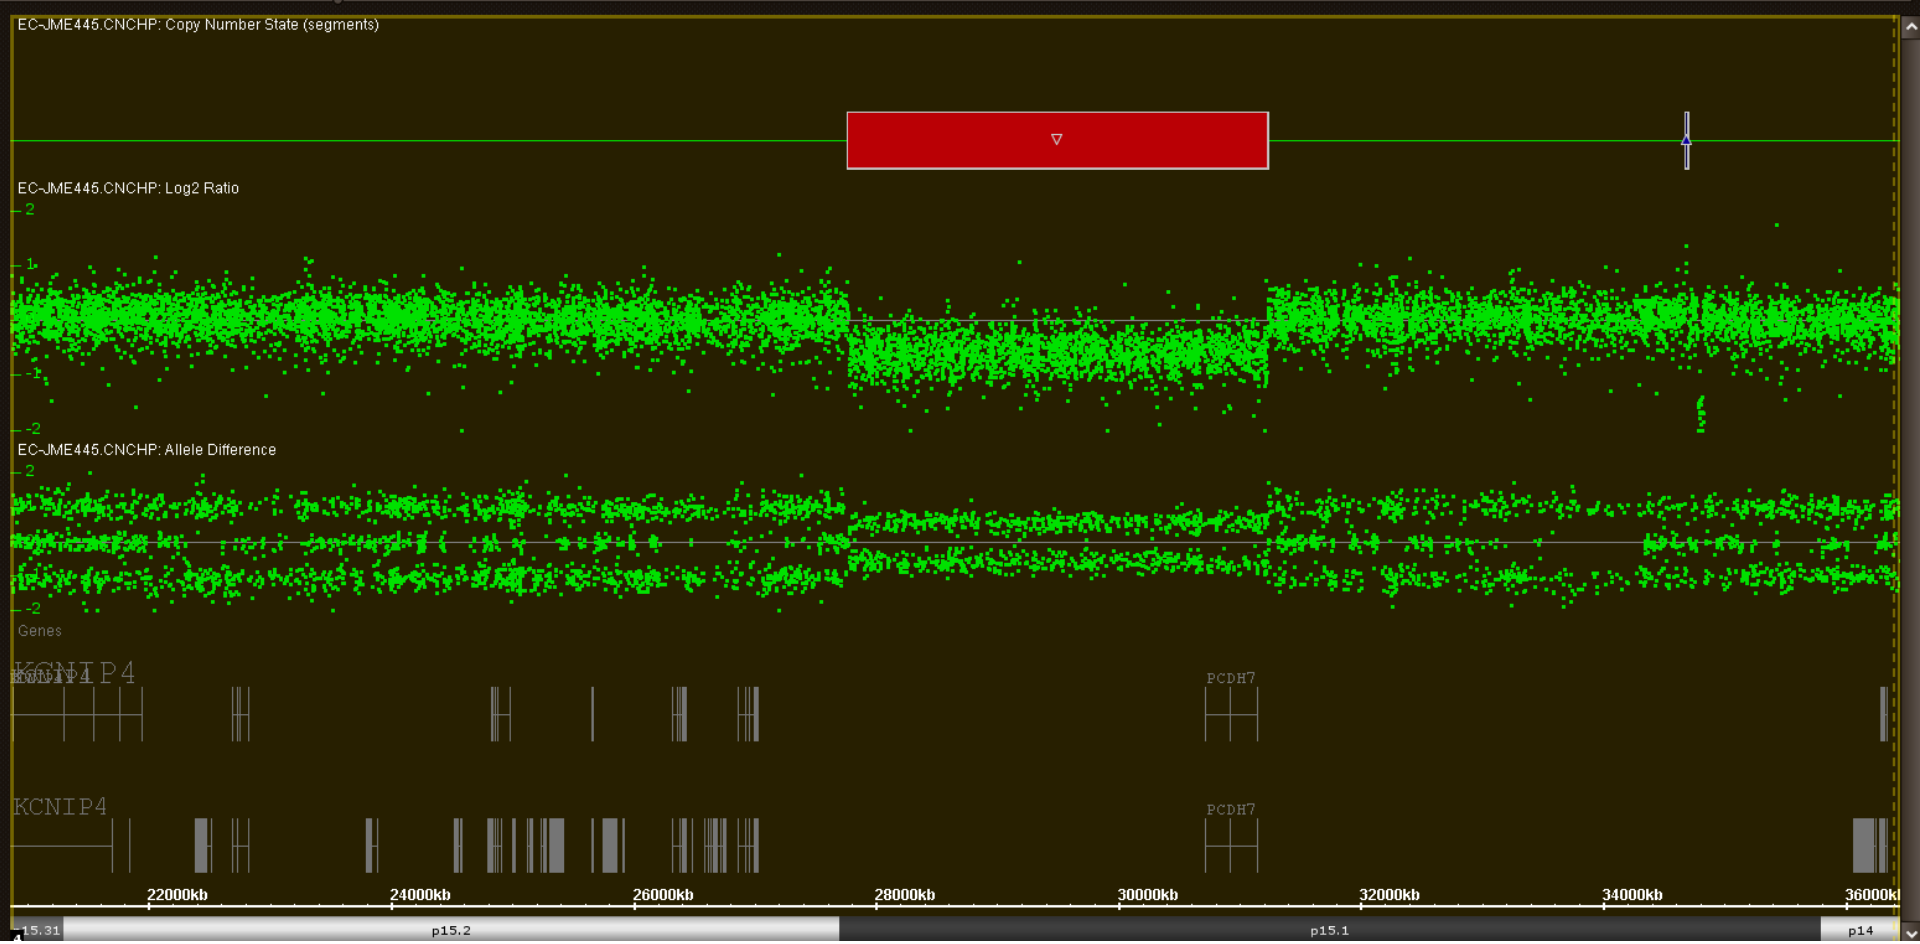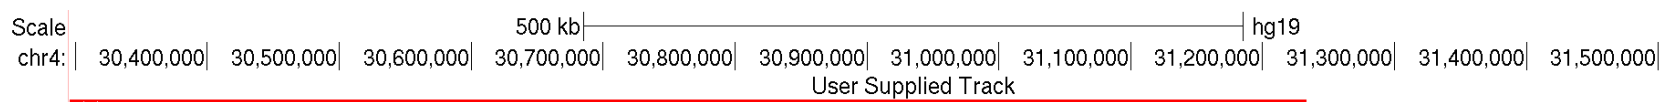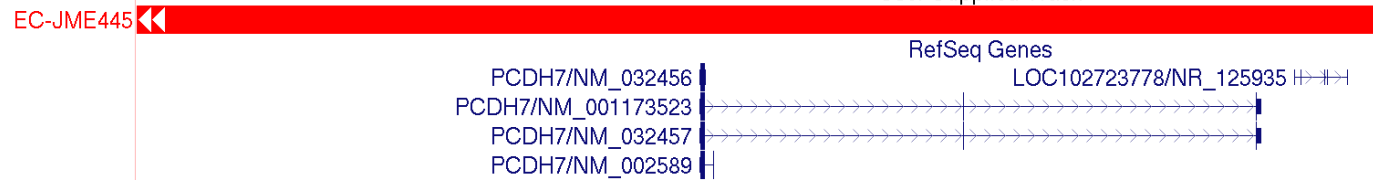



| Sample-ID | GGE Syndrome | Chr | Start  | End     | Candidate gene           |
|-----------|--------------|-----|--------|---------|--------------------------|
| EC-CAE099 | 6/CAE,gsw    | 5   | 275875 | 1257621 | <i>SLC6A19,TERT,BRD9</i> |

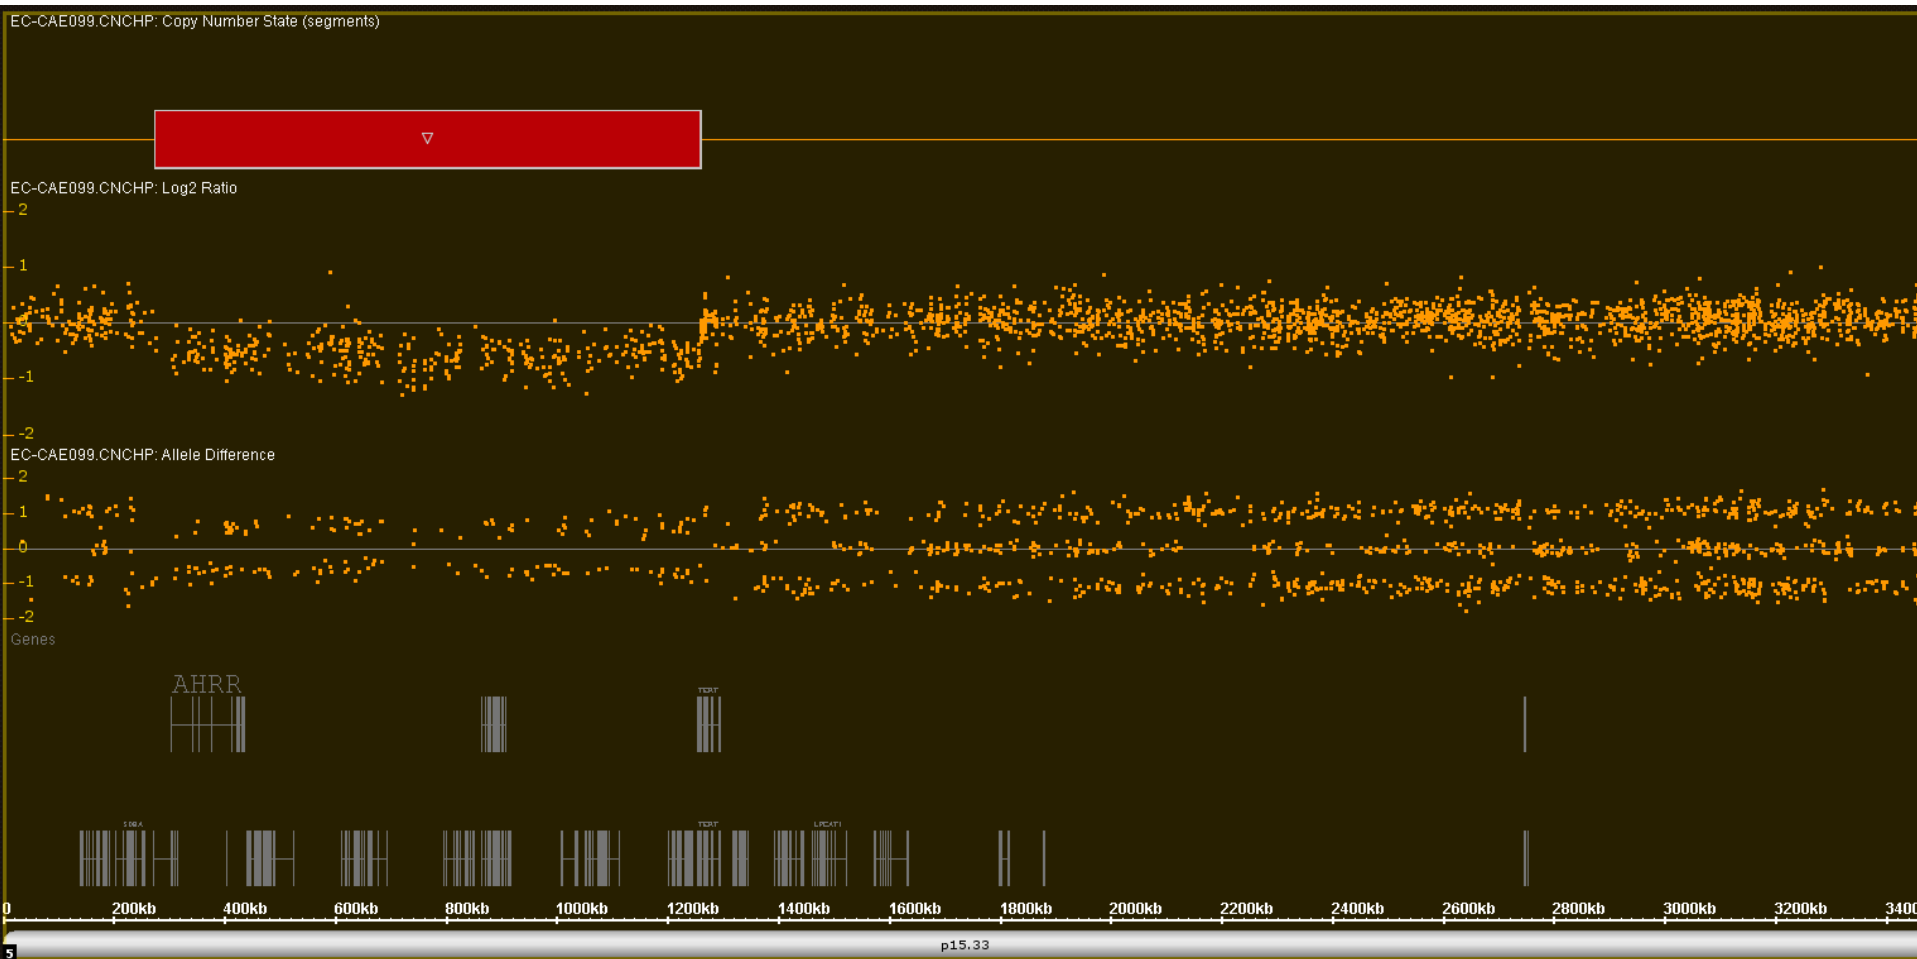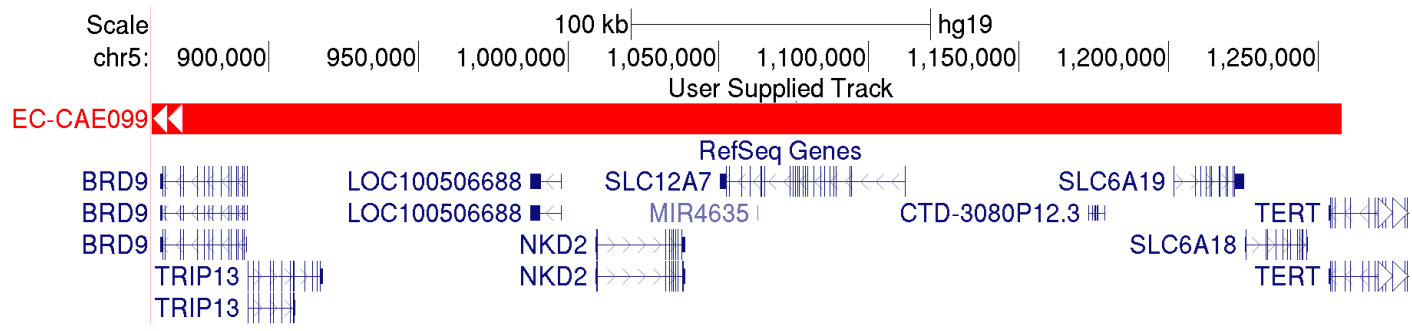

| Sample-ID | GGE Syndrome | Chr | Start    | End      | Candidate gene              |
|-----------|--------------|-----|----------|----------|-----------------------------|
| EC-JME481 | 14/JME,gsu   | 5   | 28059042 | 31736582 | <i>DROSHA</i> , <i>CDH6</i> |

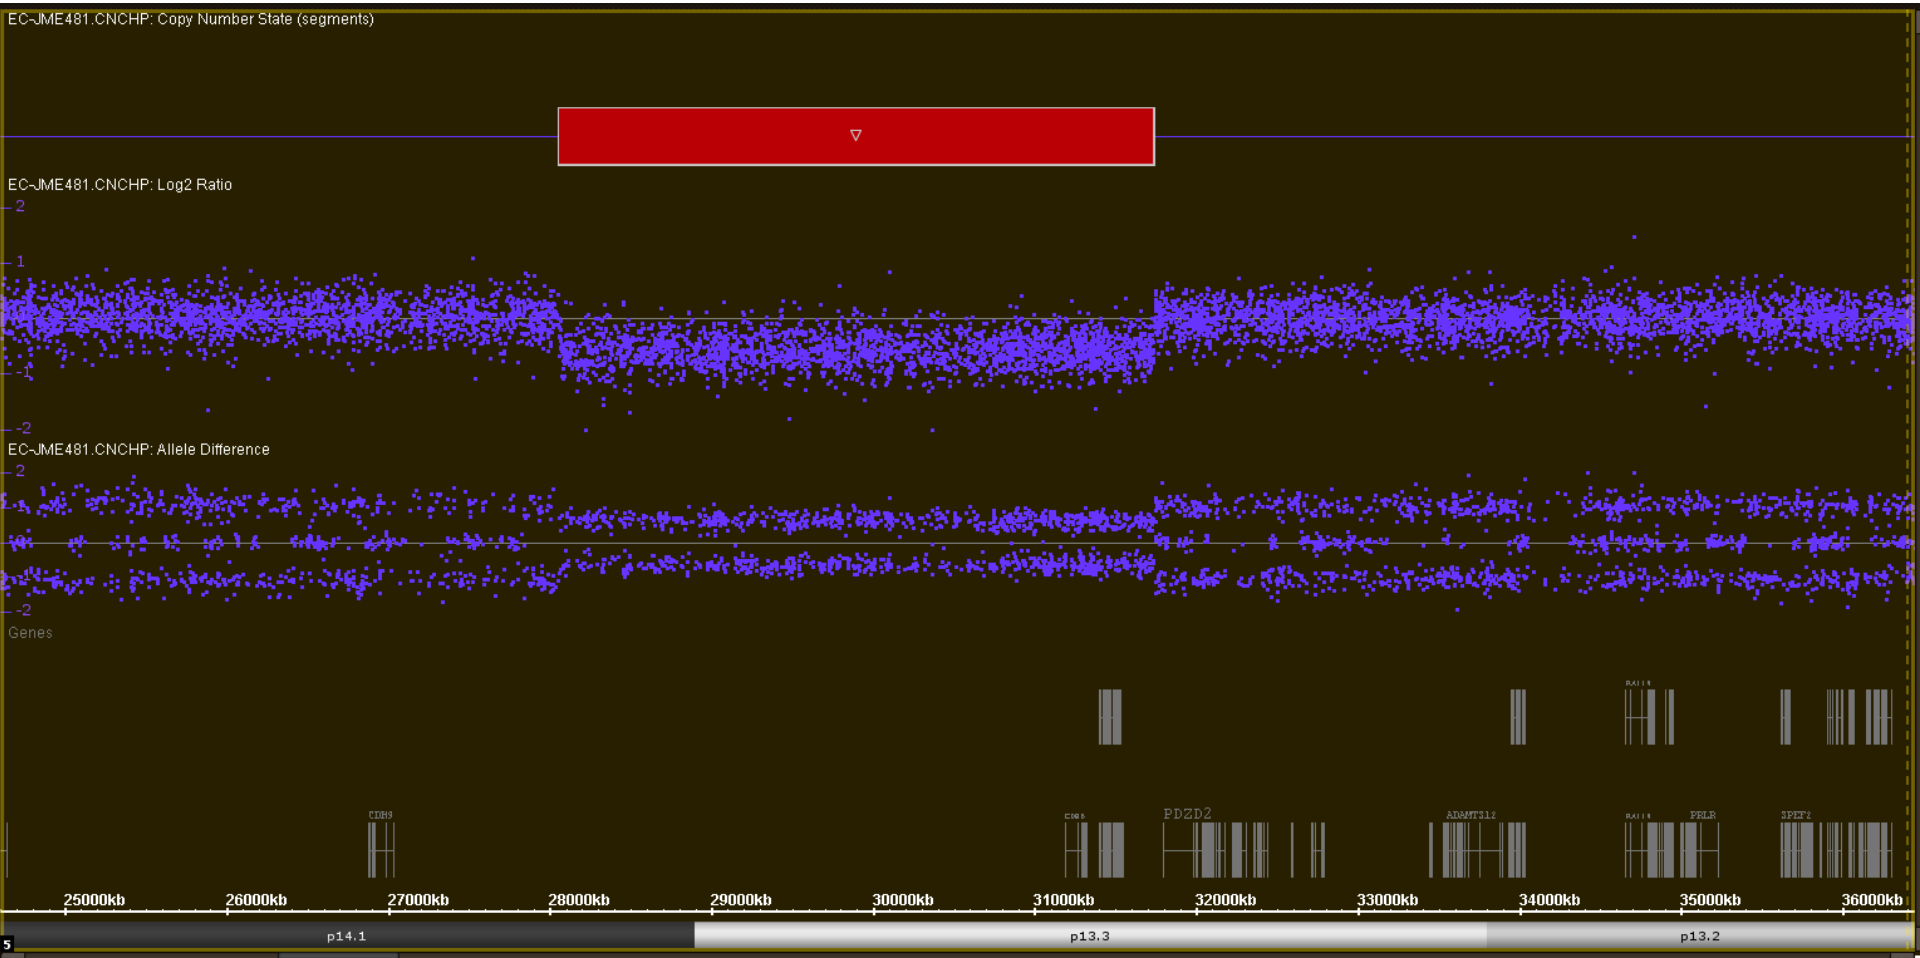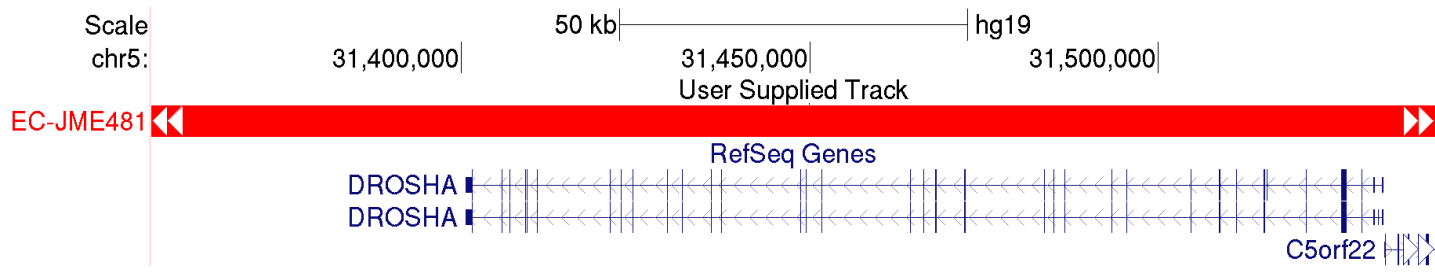

| Sample-ID | GGE Syndrome | Chr | Start     | End       | Candidate gene    |
|-----------|--------------|-----|-----------|-----------|-------------------|
| EC-CAE347 | 9/CAE,gsw    | 6   | 144444363 | 146880409 | <i>EPM2A,GRM1</i> |

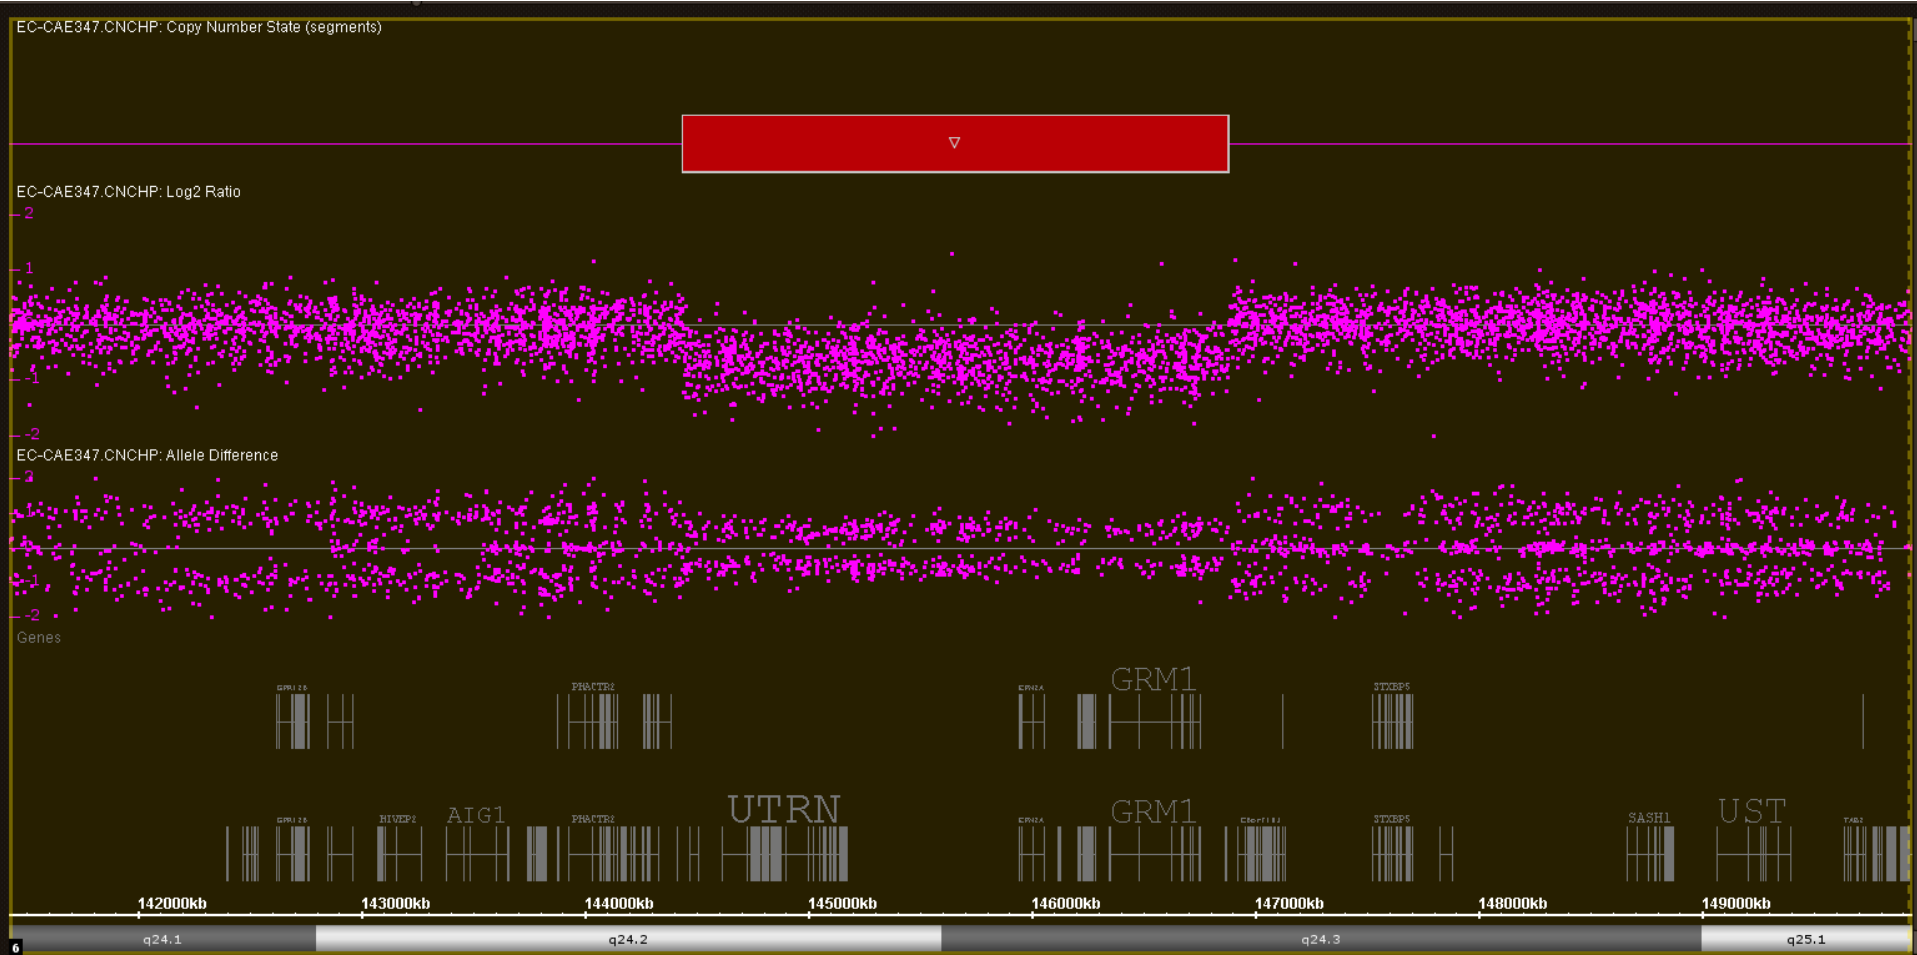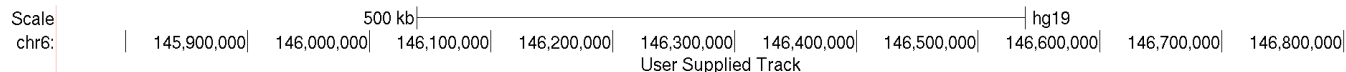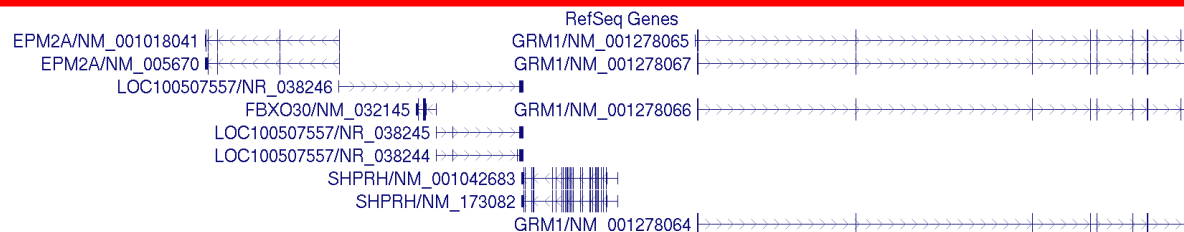

| Sample-ID | GGE Syndrome | Chr | Start     | End       | Candidate gene |
|-----------|--------------|-----|-----------|-----------|----------------|
| EC-CAE204 | 8/CAE,gsu    | 6   | 162801345 | 163287279 | PARK2          |

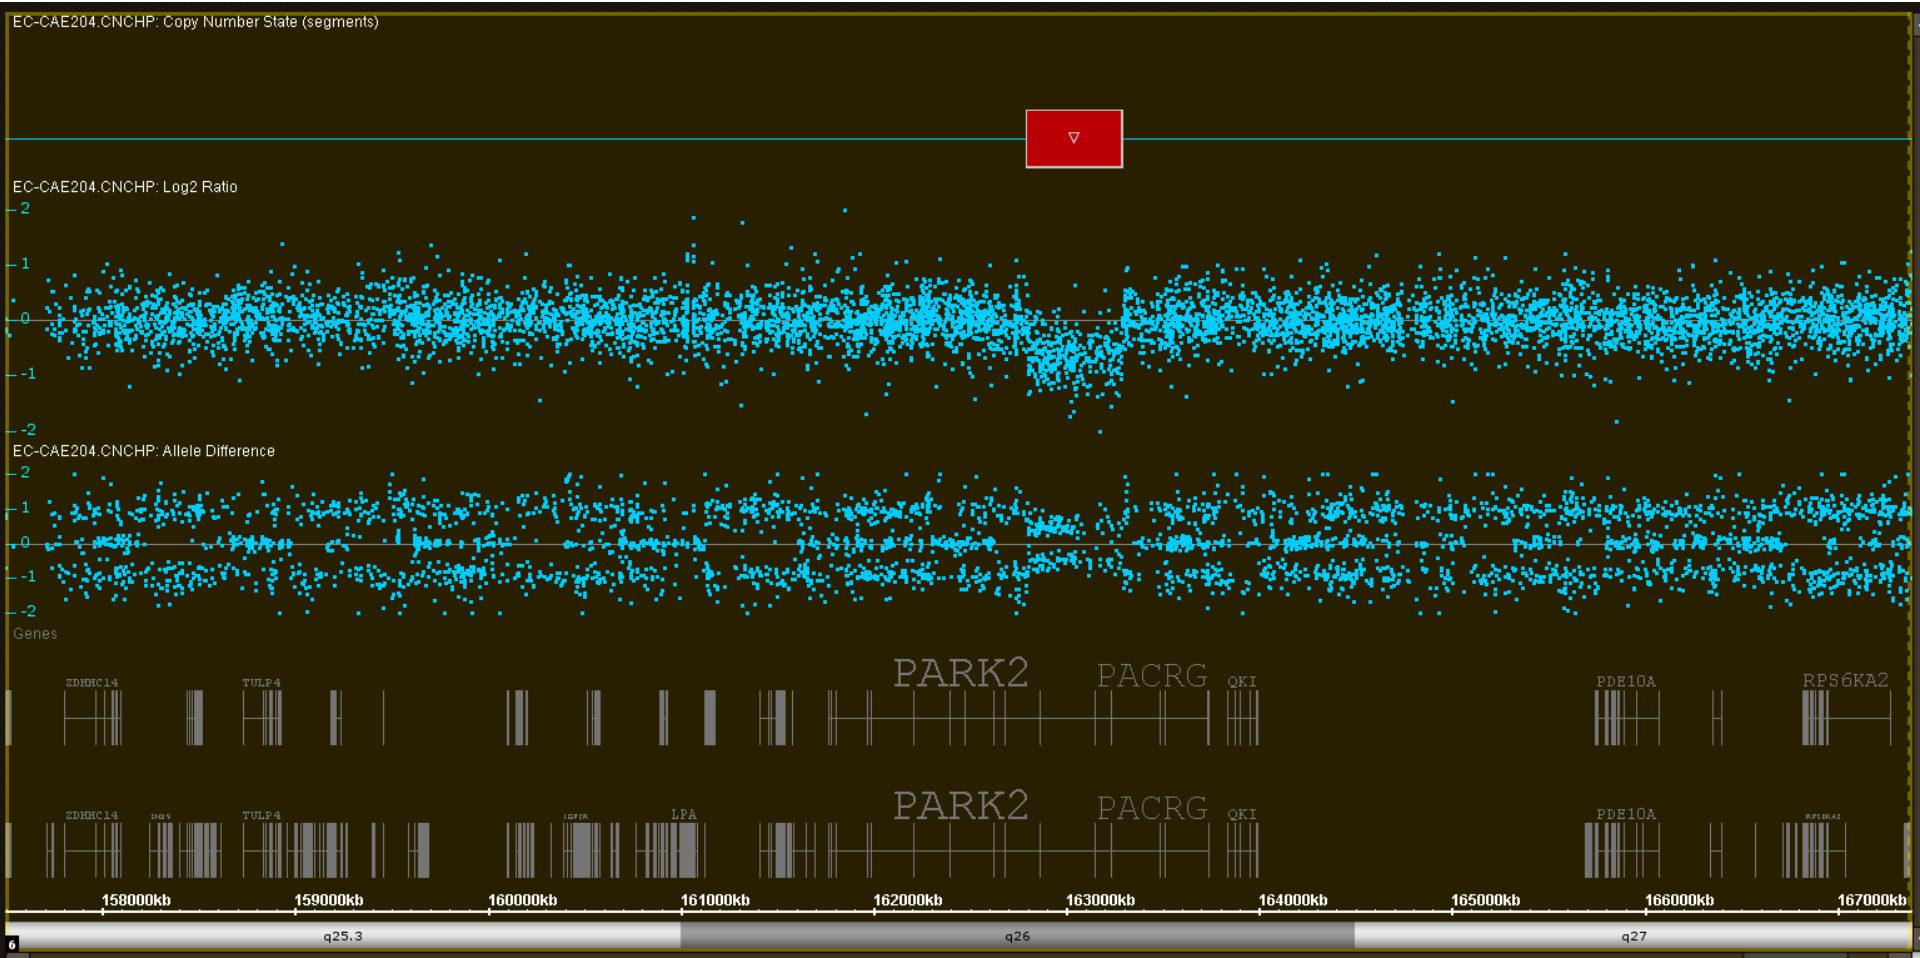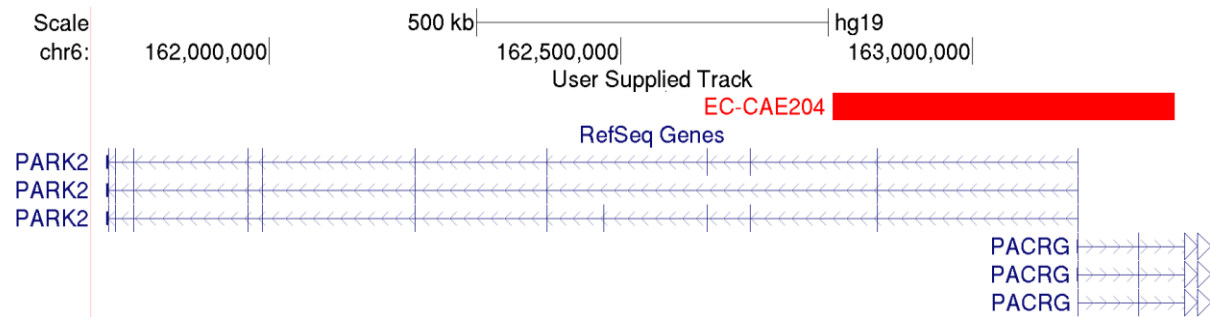

| Sample-ID | GGE Syndrome | Chr | Start     | End       | Candidate gene |
|-----------|--------------|-----|-----------|-----------|----------------|
| EC-JME461 | 4/CAE        | 7   | 124586130 | 126665734 | GRM8           |

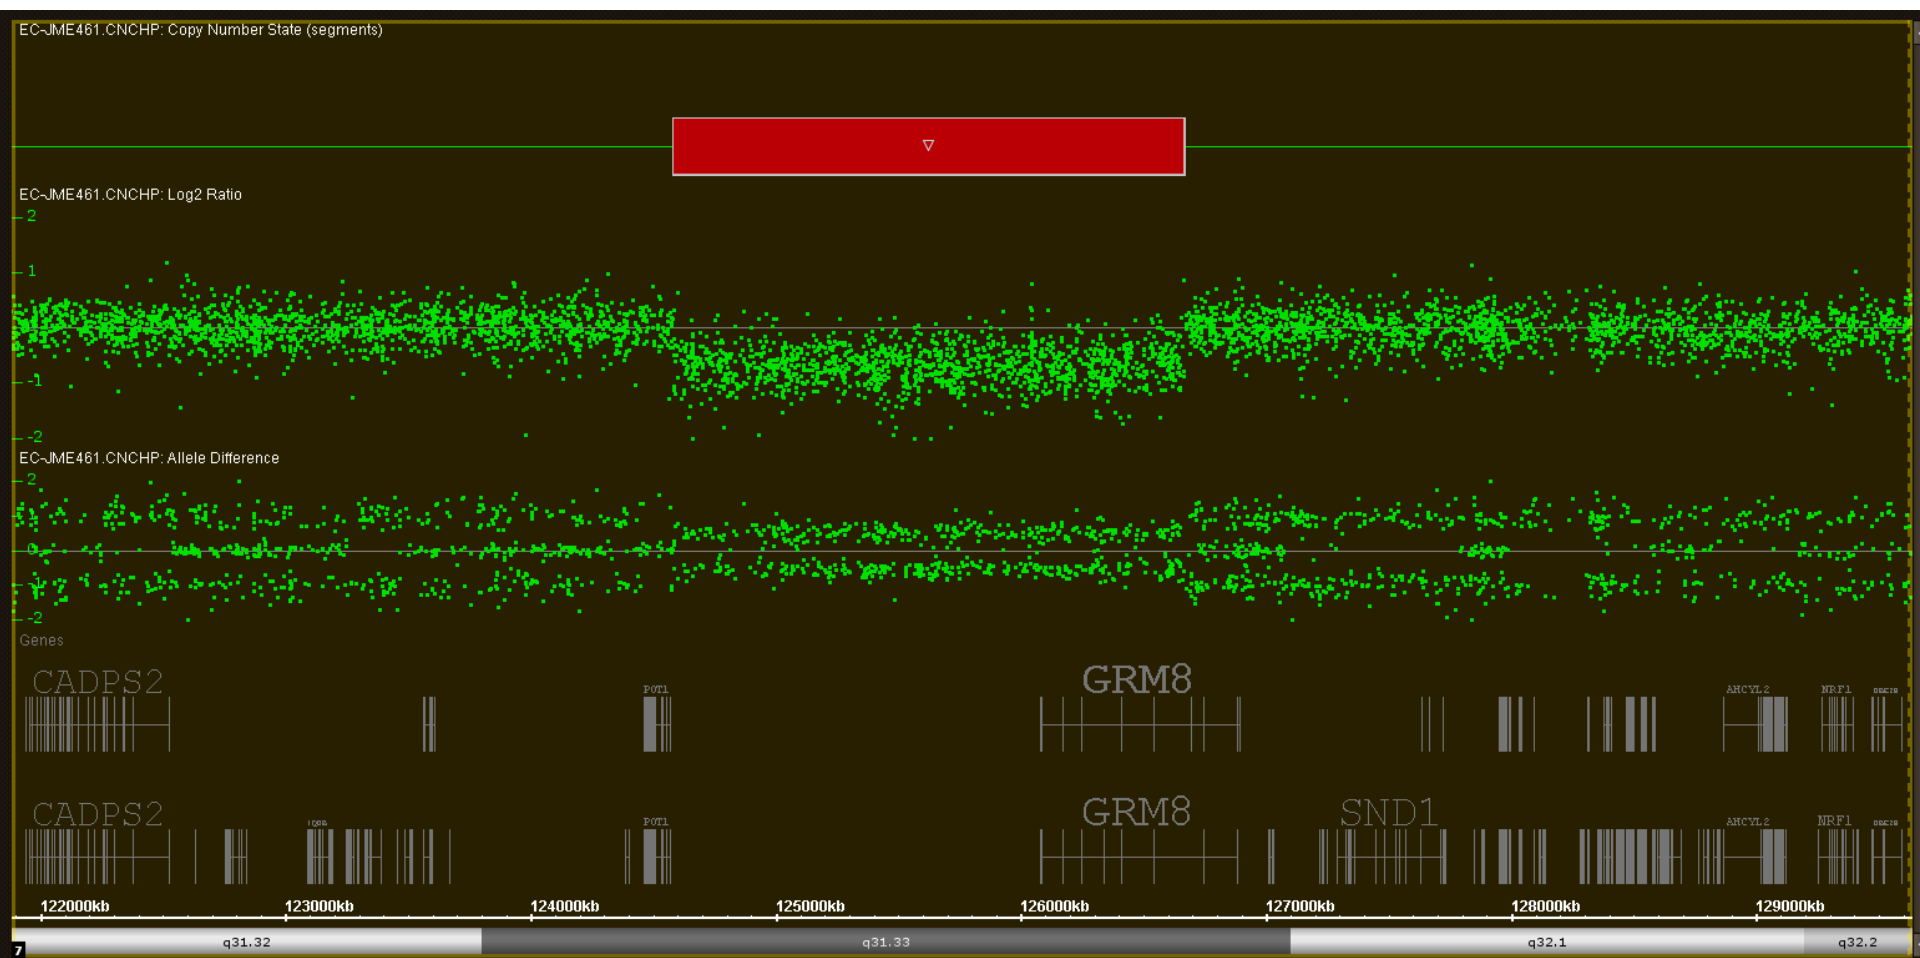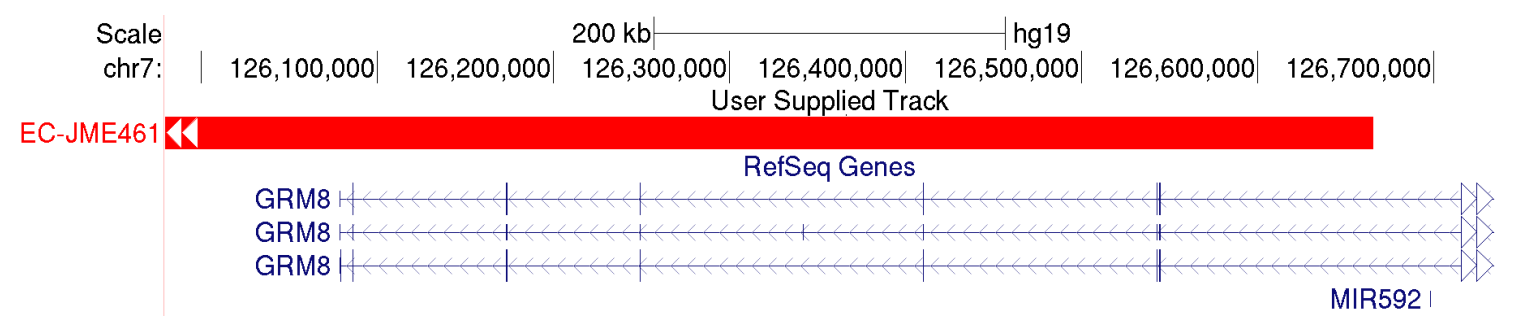

| Sample-ID | GGE Syndrome | Chr | Start     | End       | Candidate gene  |
|-----------|--------------|-----|-----------|-----------|-----------------|
| EC-CAE158 | 8/CAE,gsu    | 7   | 143223069 | 143873940 | FAM11C5,FAM115A |

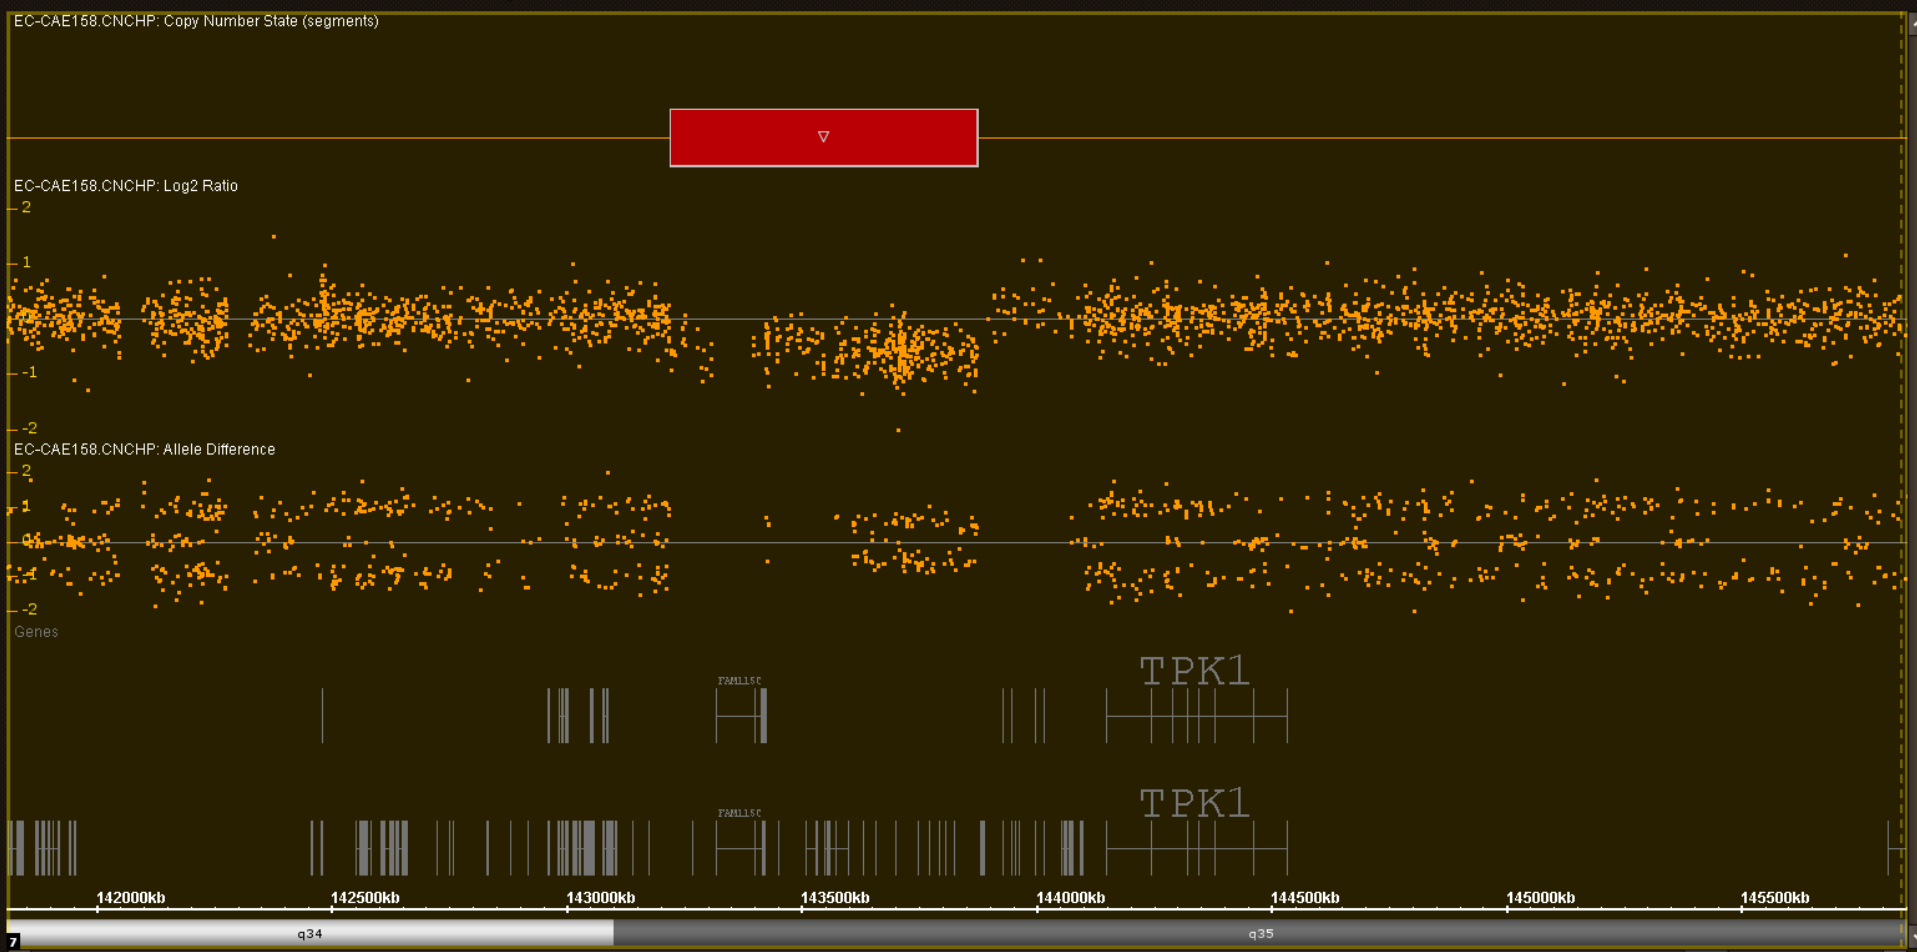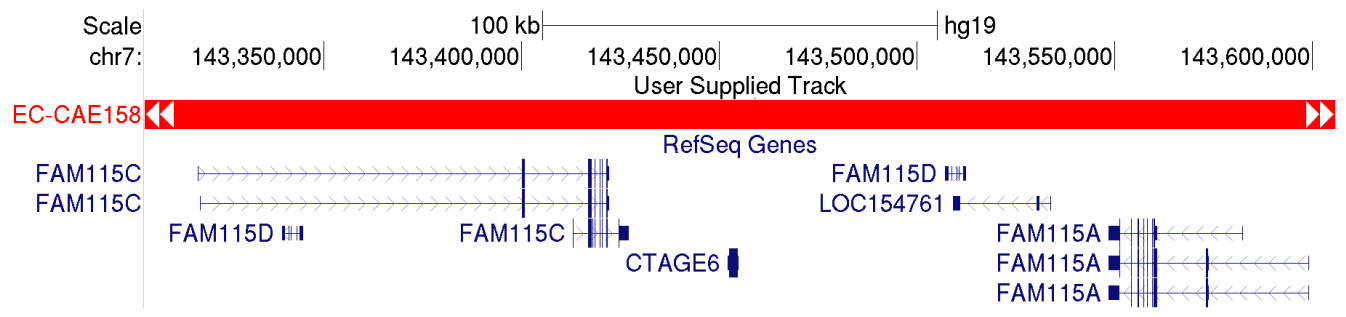

| Sample-ID   | GGE Syndrome | Chr | Start    | End       | Candidate gene |
|-------------|--------------|-----|----------|-----------|----------------|
| EC-EGTCS130 | 25/EGTCS,gsu | 8   | 99979097 | 100538070 | VPS13B         |

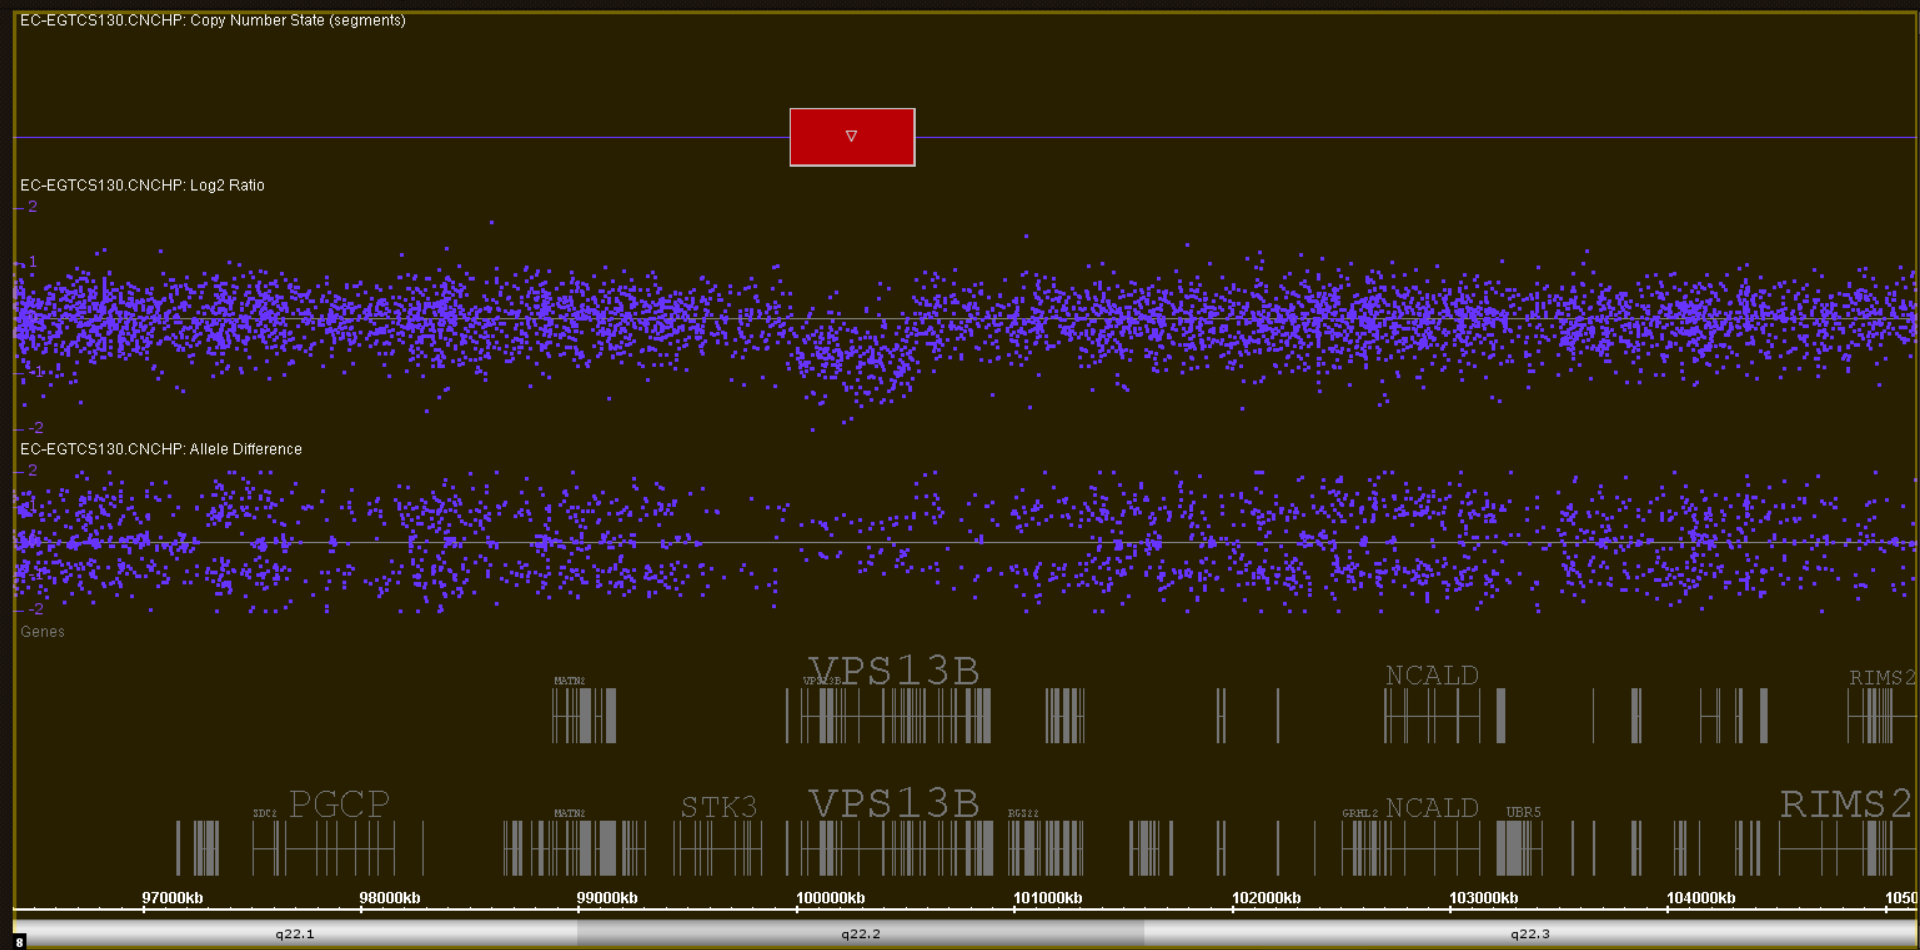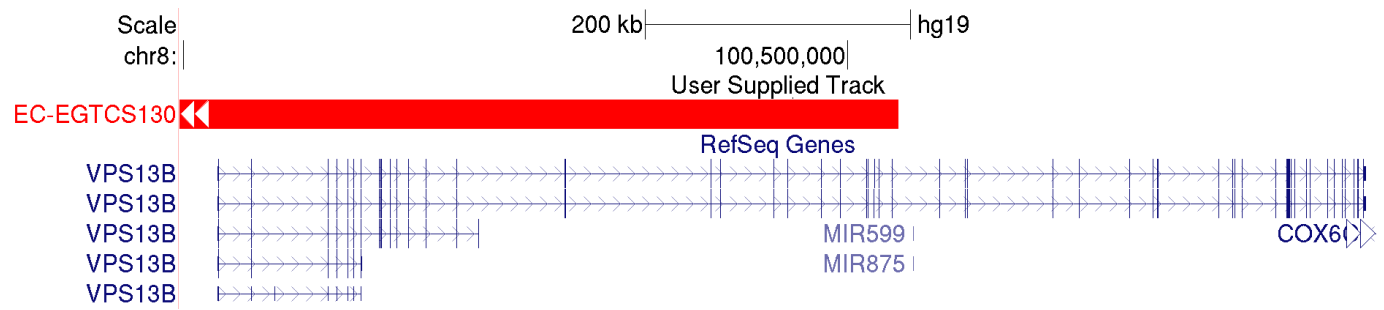

| Sample-ID | GGE Syndrome | Chr | Start     | End       | Candidate gene          |
|-----------|--------------|-----|-----------|-----------|-------------------------|
| EC-JME417 | 17/JME,gsw   | 8   | 142563566 | 143798641 | <i>TSNARE1,BAI1,ARC</i> |

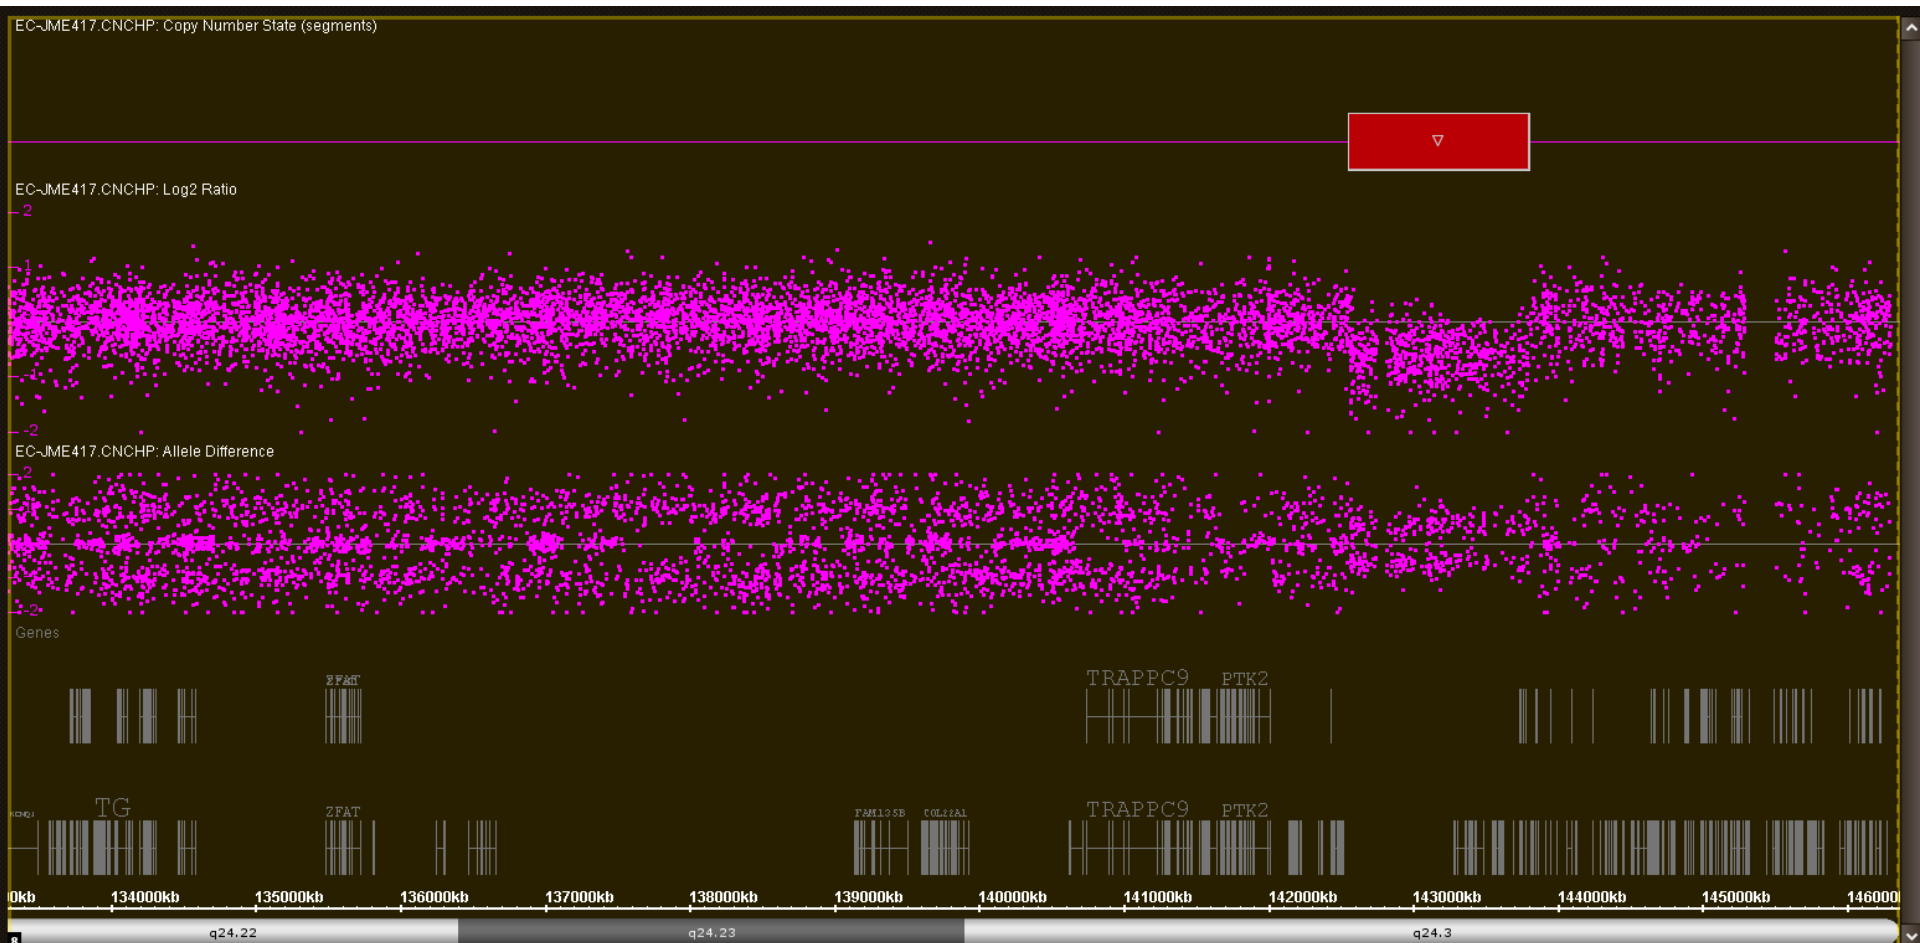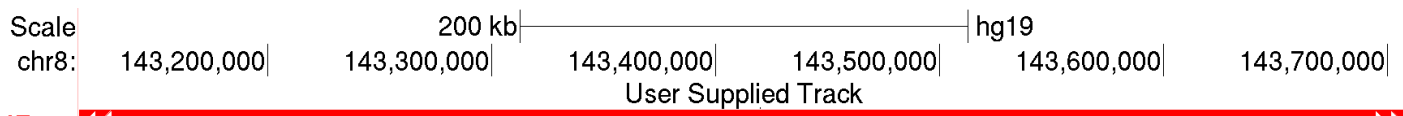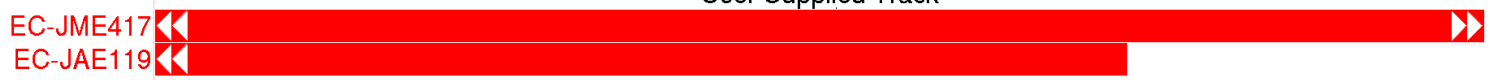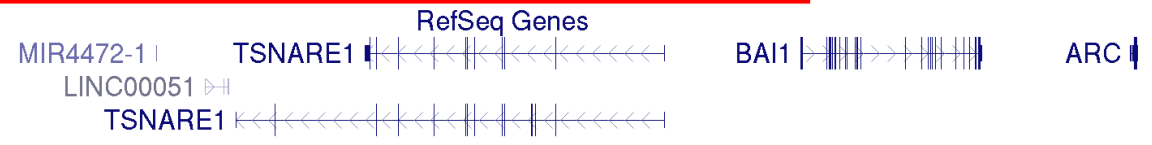



| Sample-ID | GGE Syndrome | Chr | Start     | End       | Candidate gene      |
|-----------|--------------|-----|-----------|-----------|---------------------|
| EC-JAE119 | 16/JAE,gsww  | 8   | 142850077 | 143549806 | <i>TSNARE1,BAI1</i> |

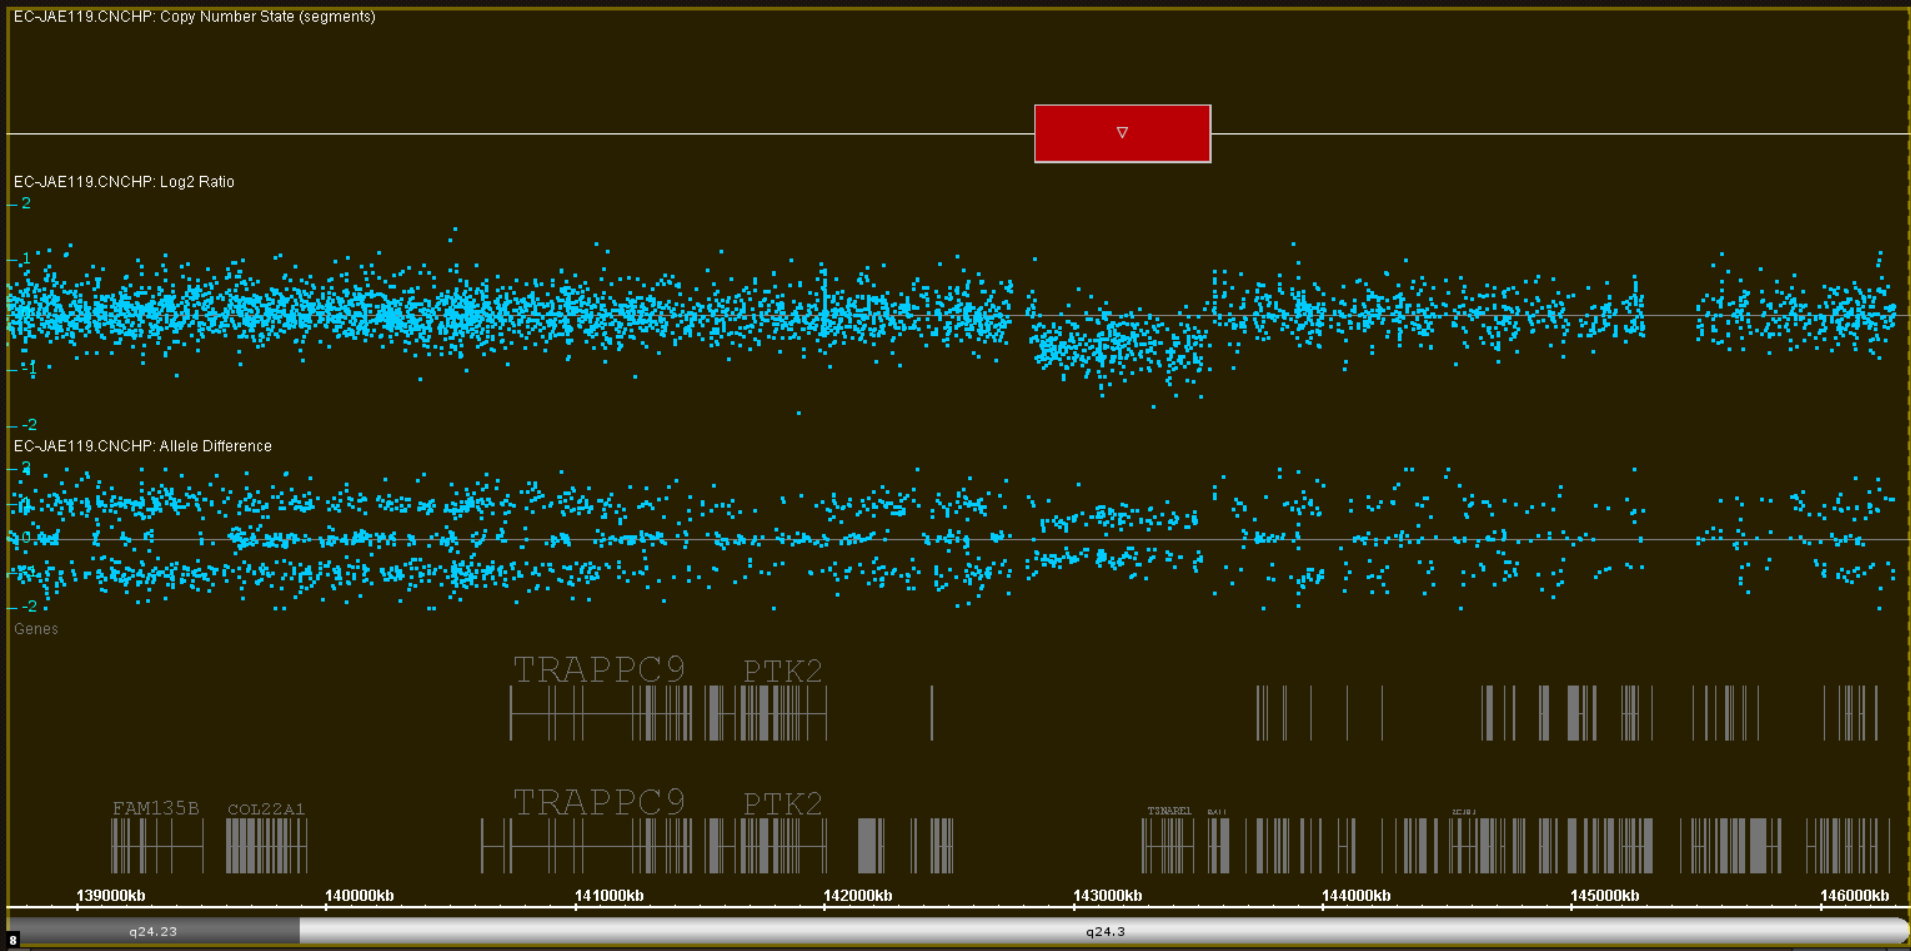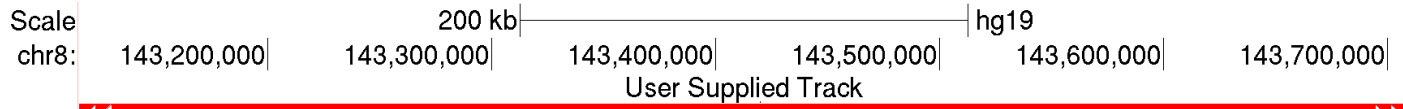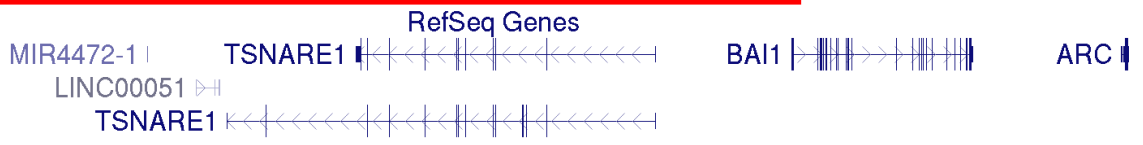

| Sample-ID | GGE Syndrome | Chr | Start    | End      | Candidate gene |
|-----------|--------------|-----|----------|----------|----------------|
| EC-CAE300 | 10/CAE       | 9   | 76601085 | 77182821 | <b>RORB</b>    |

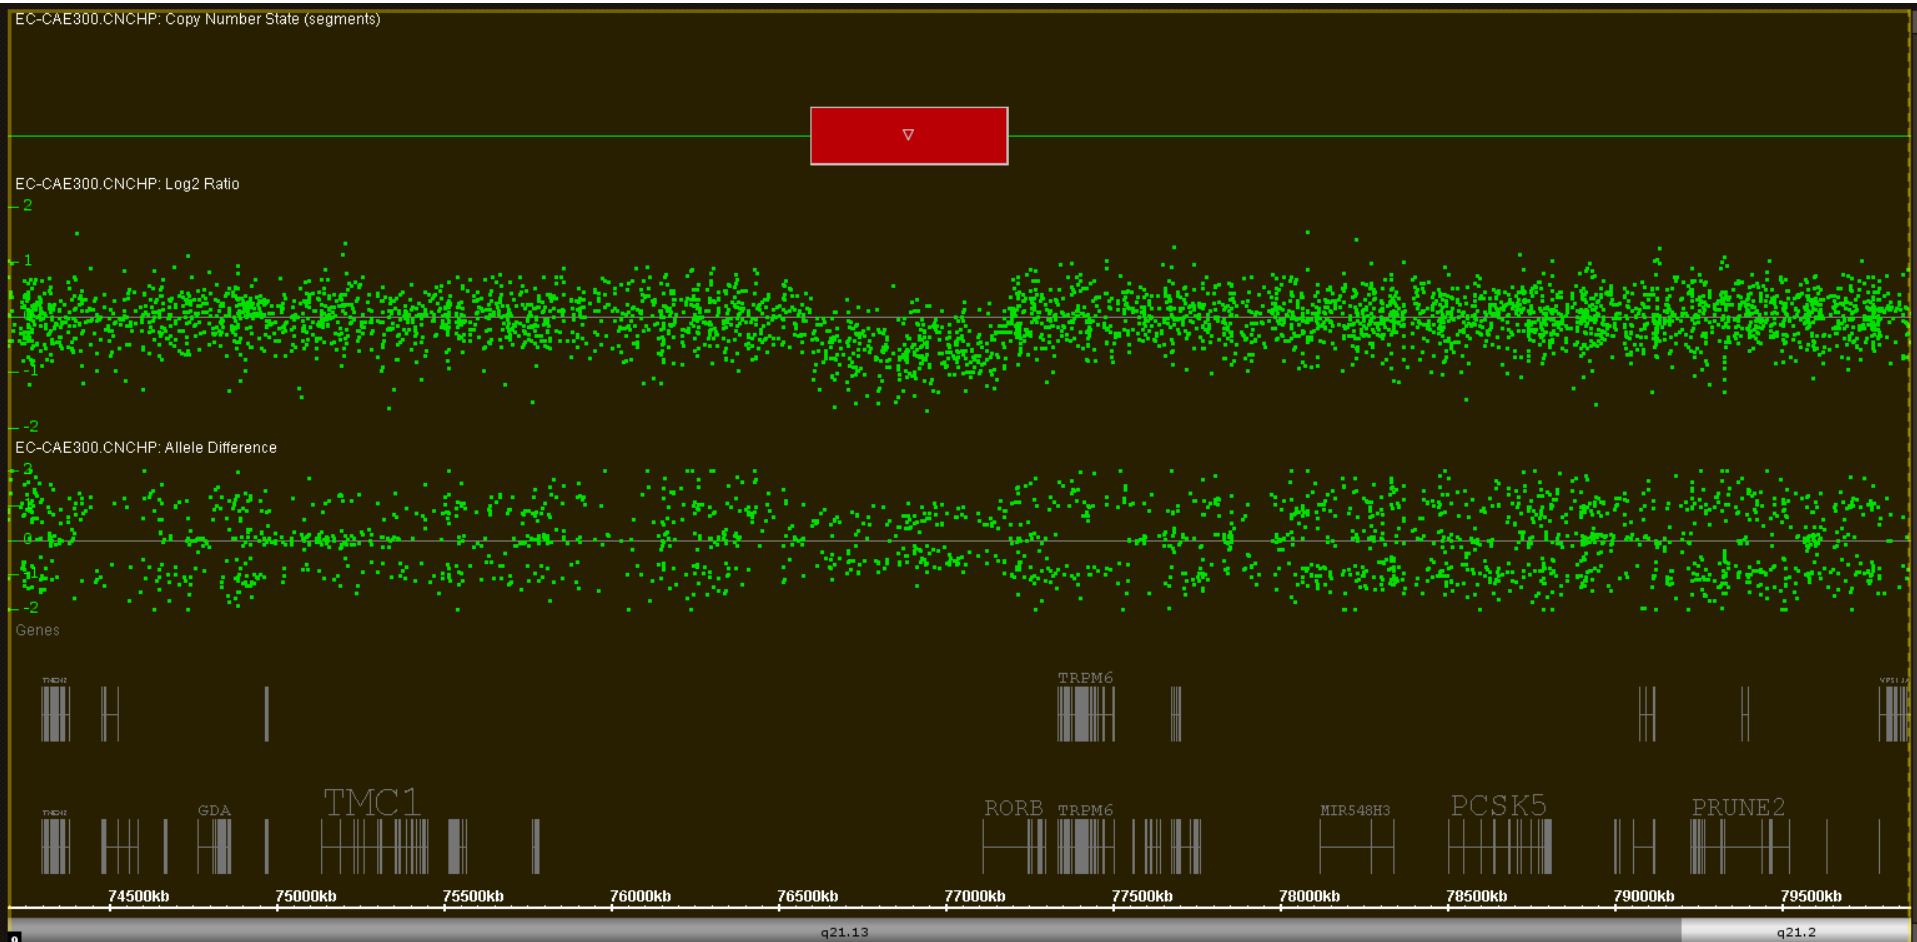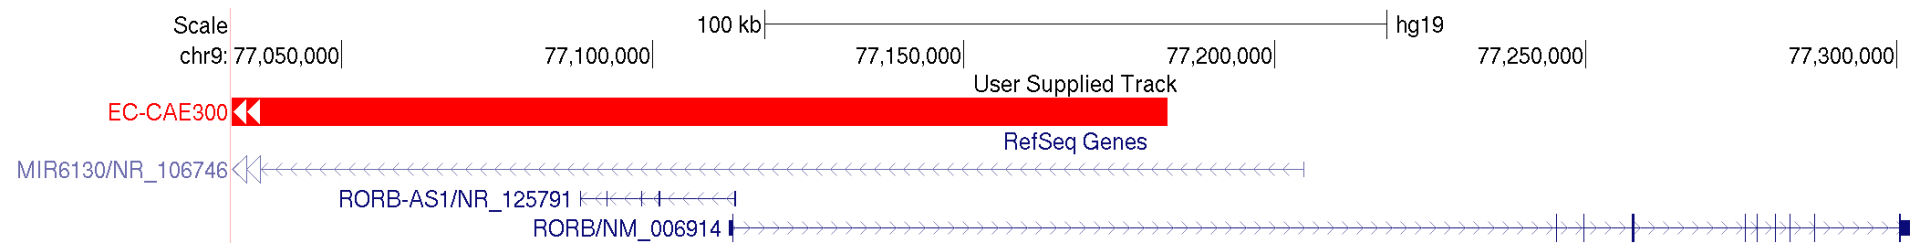

| Sample-ID | GGE Syndrome | Chr | Start    | End      | Candidate gene |
|-----------|--------------|-----|----------|----------|----------------|
| EC-JME005 | 12/JME,gsww  | 10  | 27836576 | 28429513 | MPP7,ARMC4,MKX |

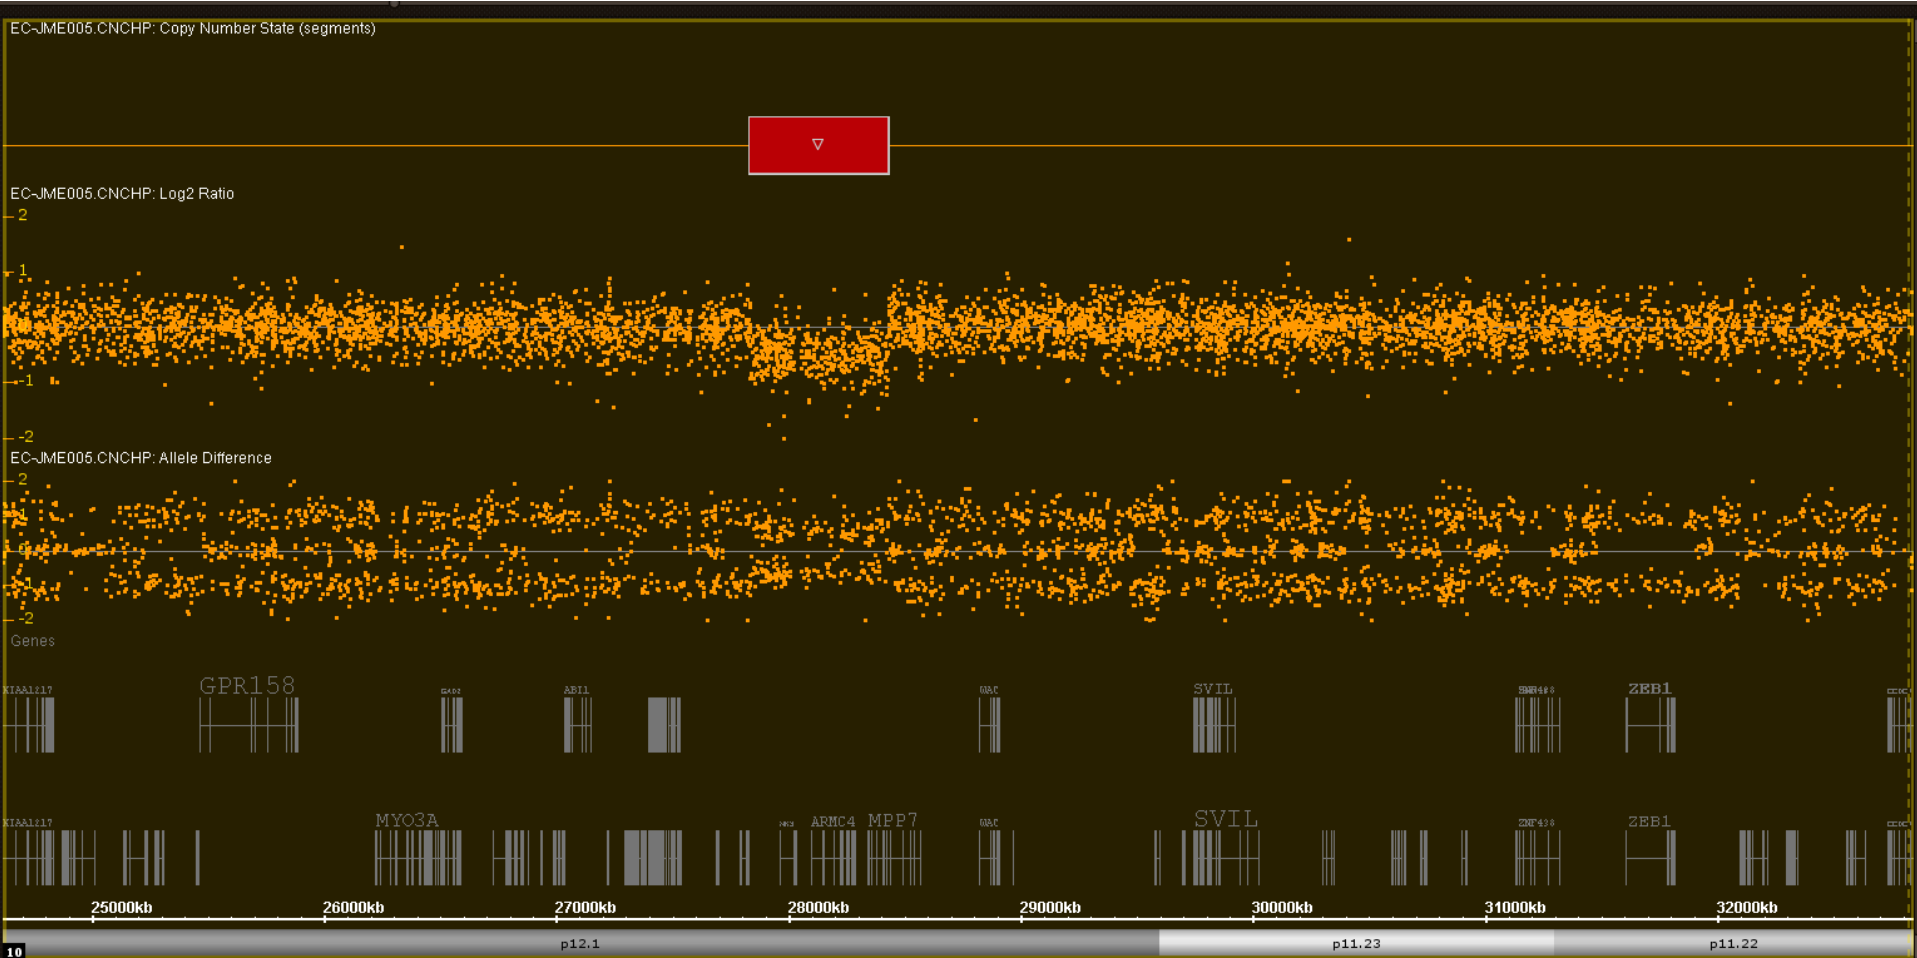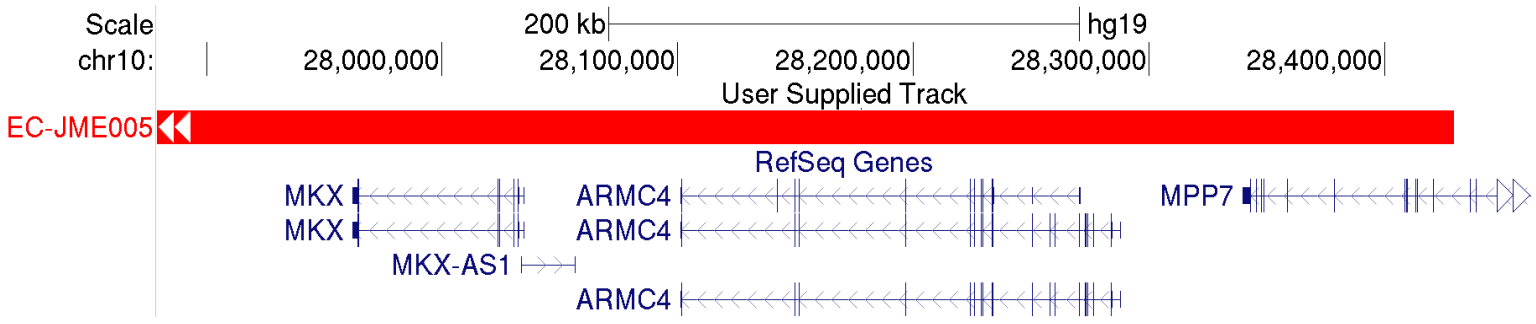

| Sample-ID | GGE Syndrome | Chr | Start   | End     | Candidate gene         |
|-----------|--------------|-----|---------|---------|------------------------|
| EC-JME054 | 20/JME,gsu   | 11  | 4167416 | 5262622 | <i>C11orf40,TRIM68</i> |

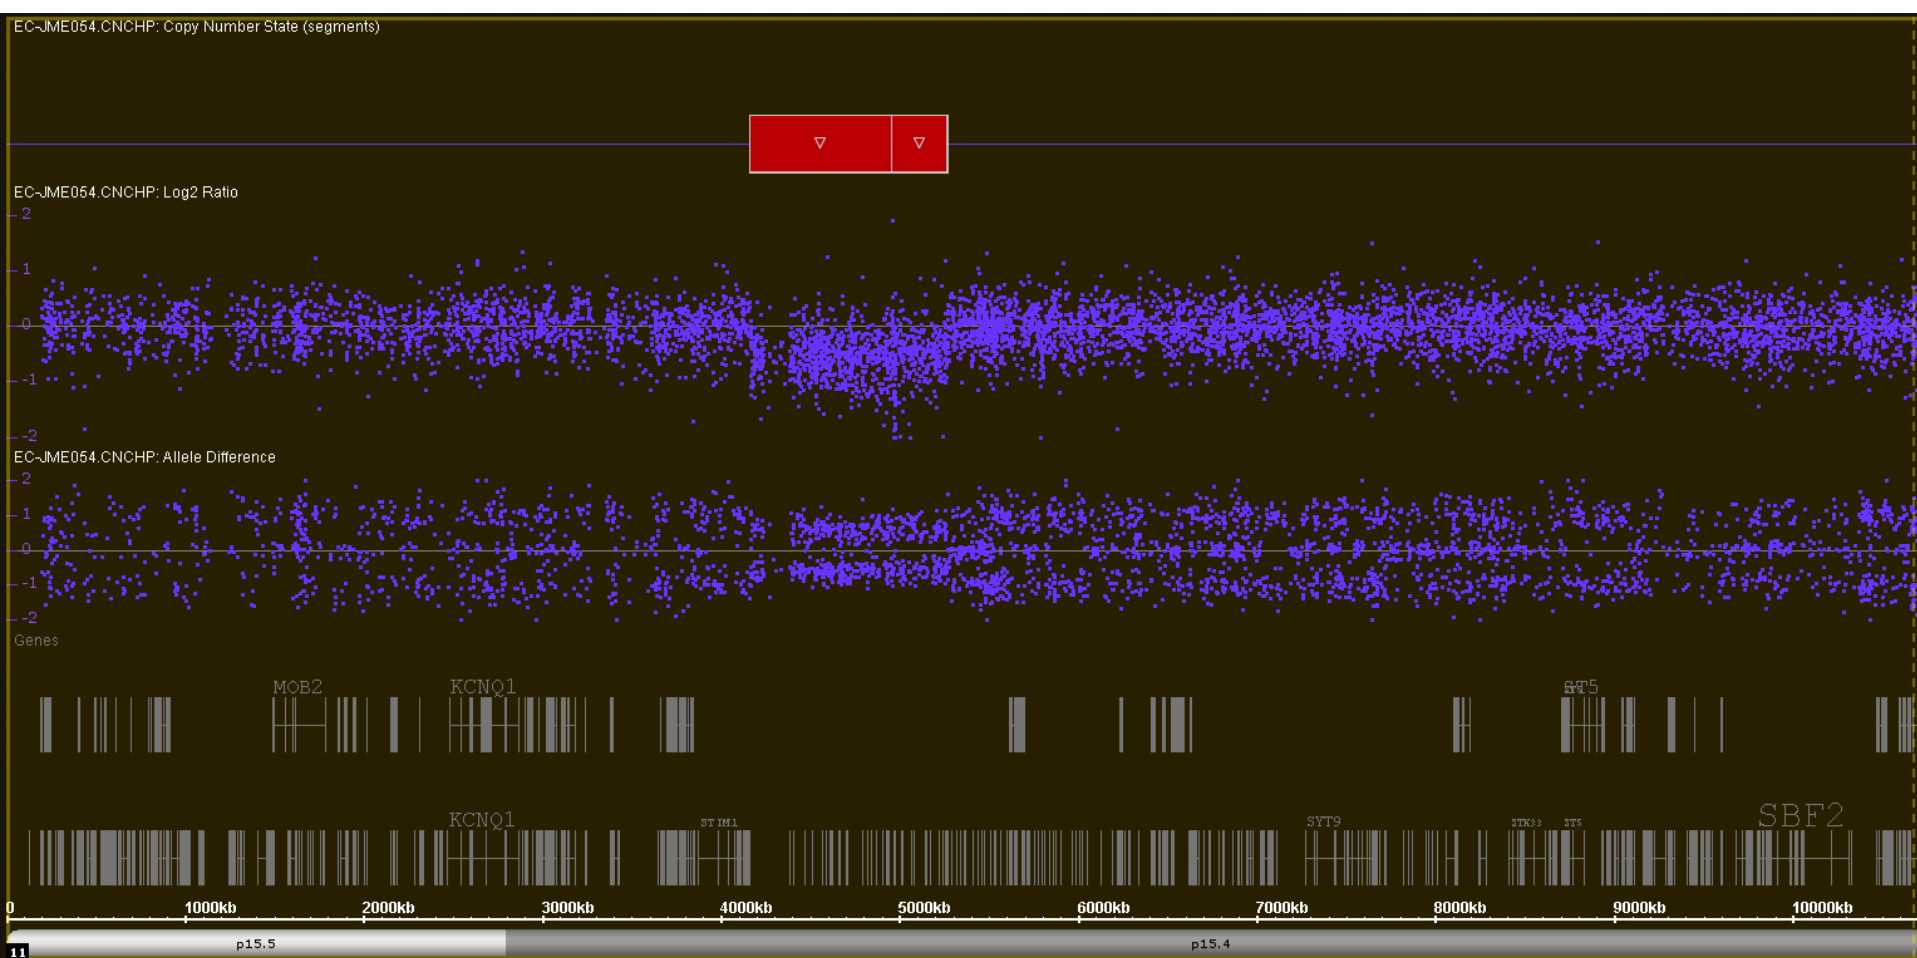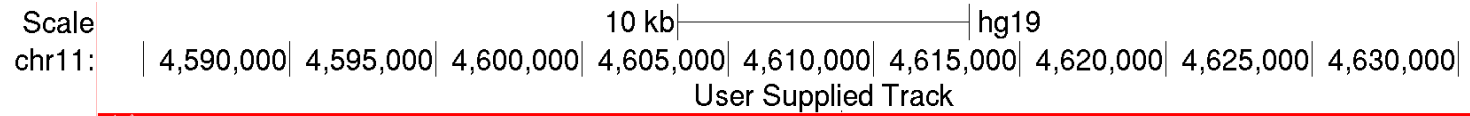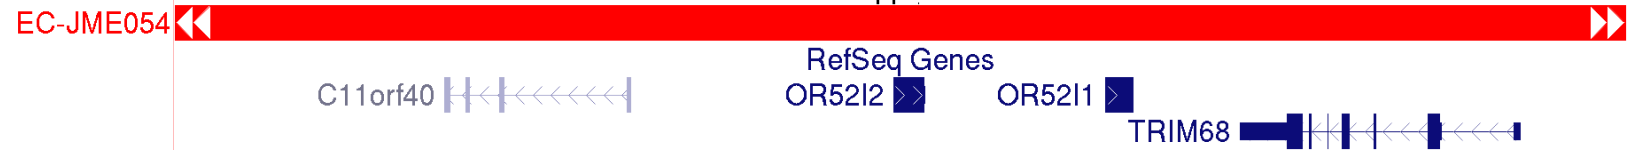

| Sample-ID | GGE Syndrome | Chr | Start    | End      | Candidate gene      |
|-----------|--------------|-----|----------|----------|---------------------|
| EC-JME425 | 13/JME       | 12  | 72135173 | 73995884 | <i>TBC1D15,TPH2</i> |

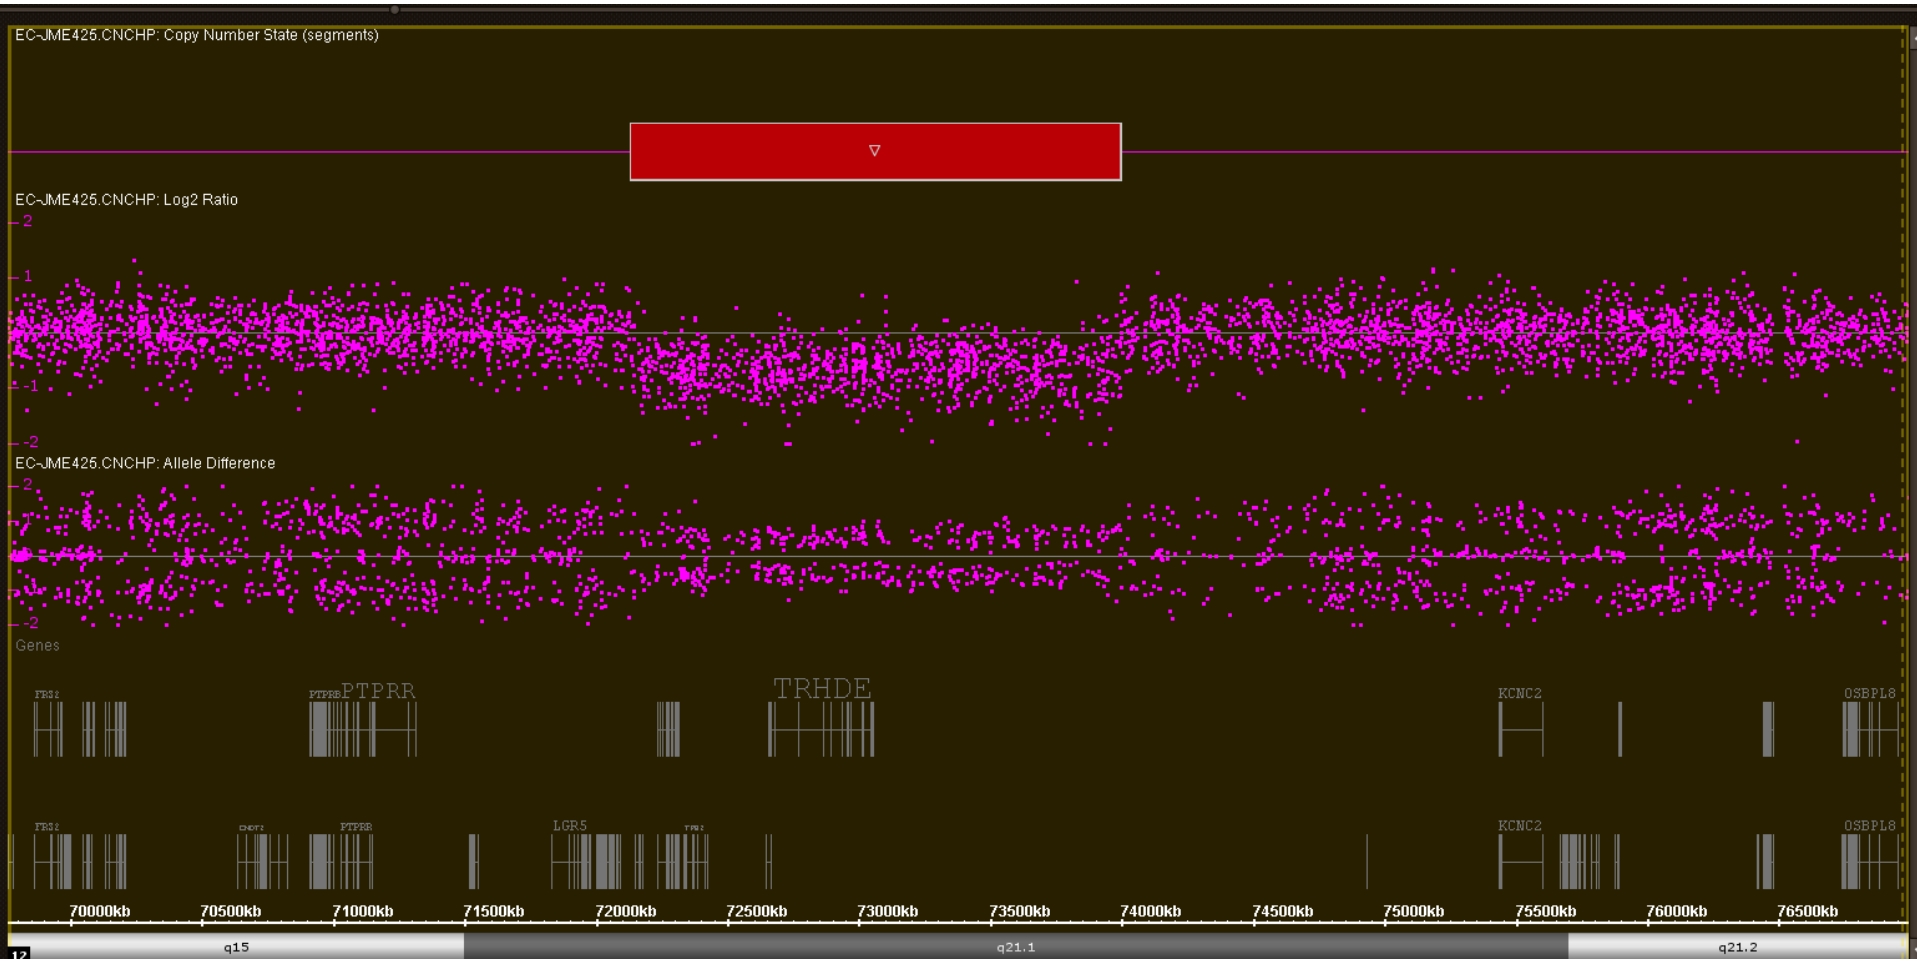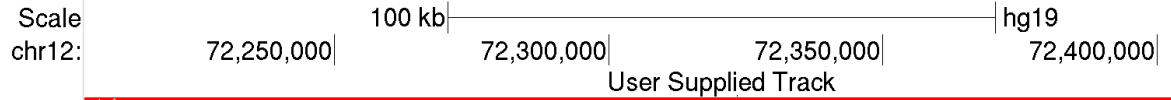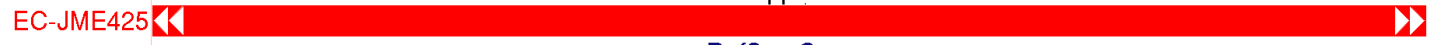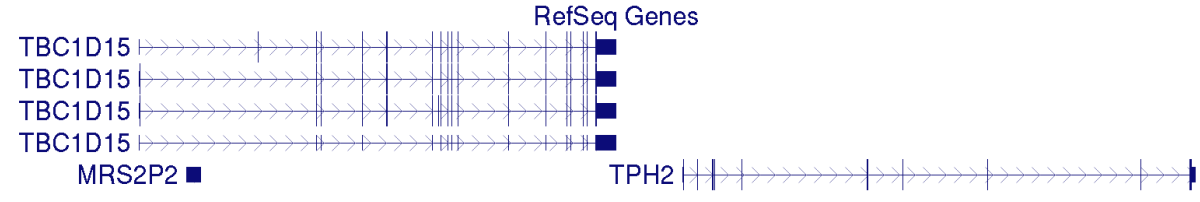

| Sample-ID | GGE Syndrome | Chr | Start    | End      | Candidate gene |
|-----------|--------------|-----|----------|----------|----------------|
| EC-JME642 | 15JME,gsu    | 15  | 84915113 | 85726714 | WDR73,PDE8A    |

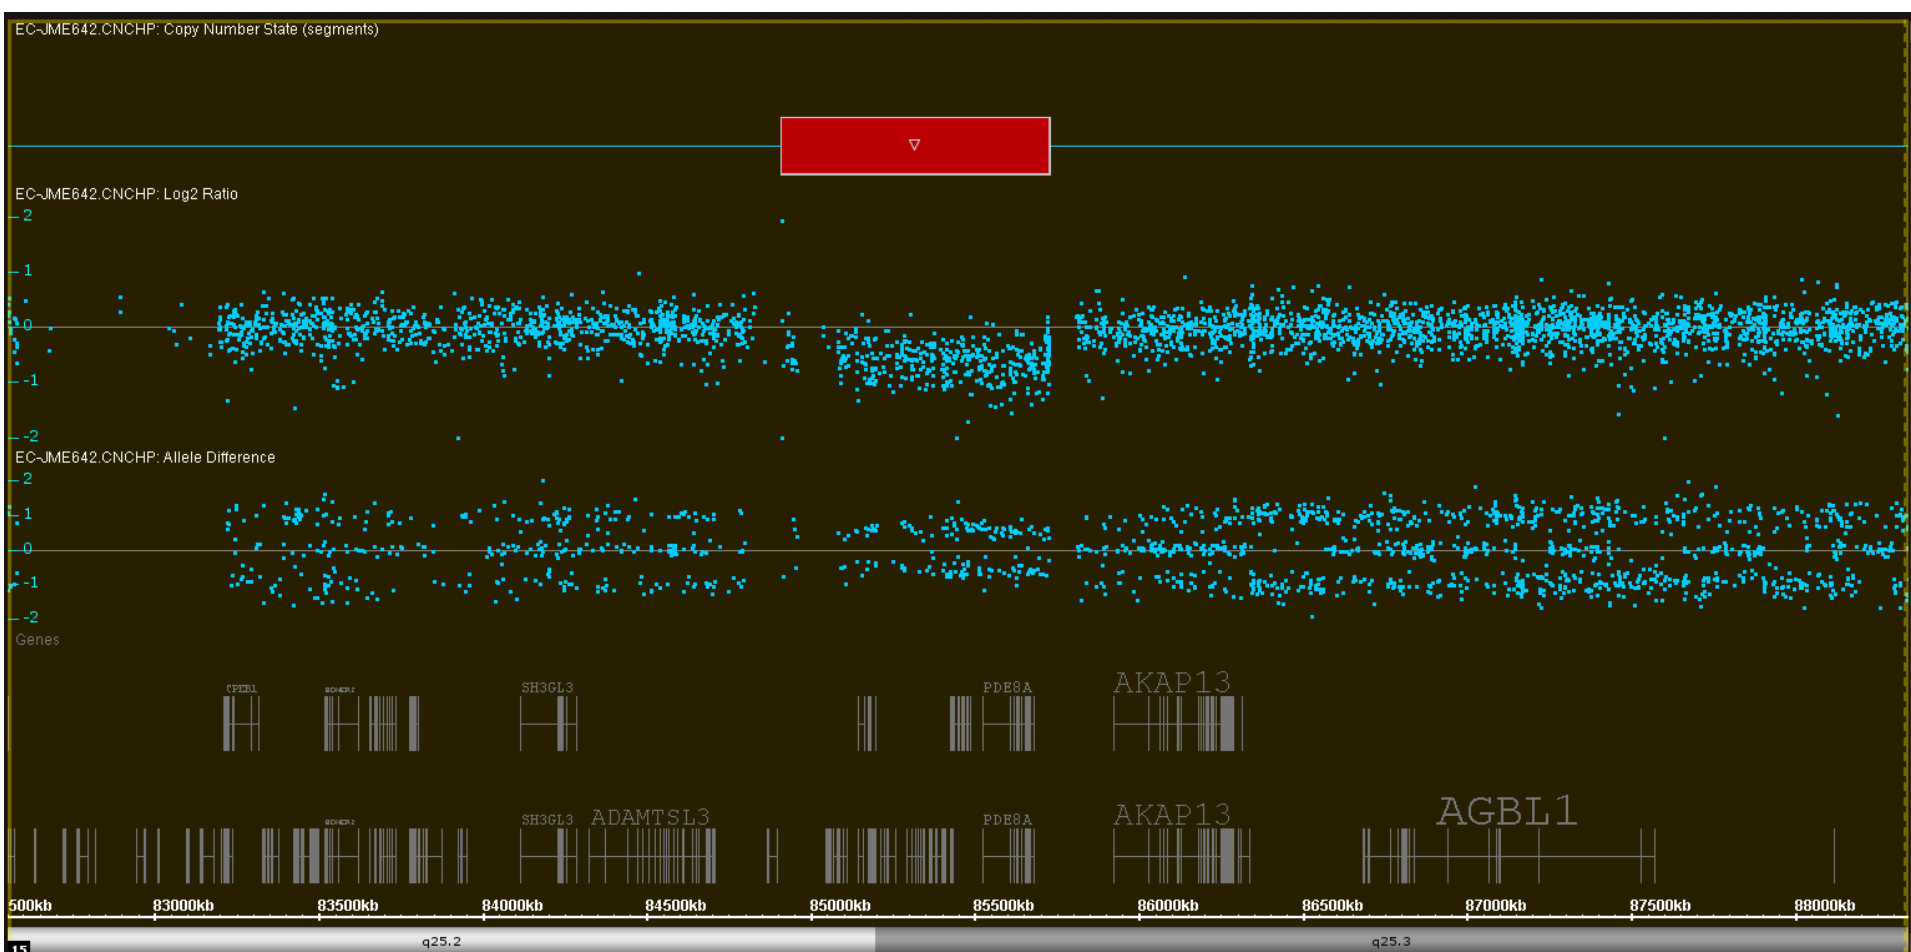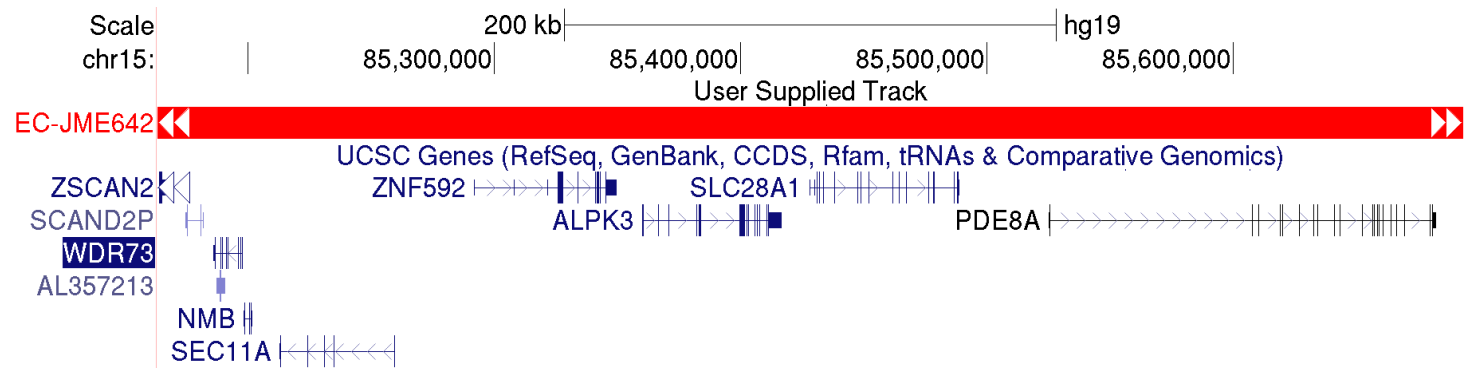

| Sample-ID | GGE Syndrome | Chr | Start   | End     | Candidate gene |
|-----------|--------------|-----|---------|---------|----------------|
| EC-CAE286 | 3/CAE,gsw    | 16  | 5615773 | 6512138 | <i>RBFOX1</i>  |

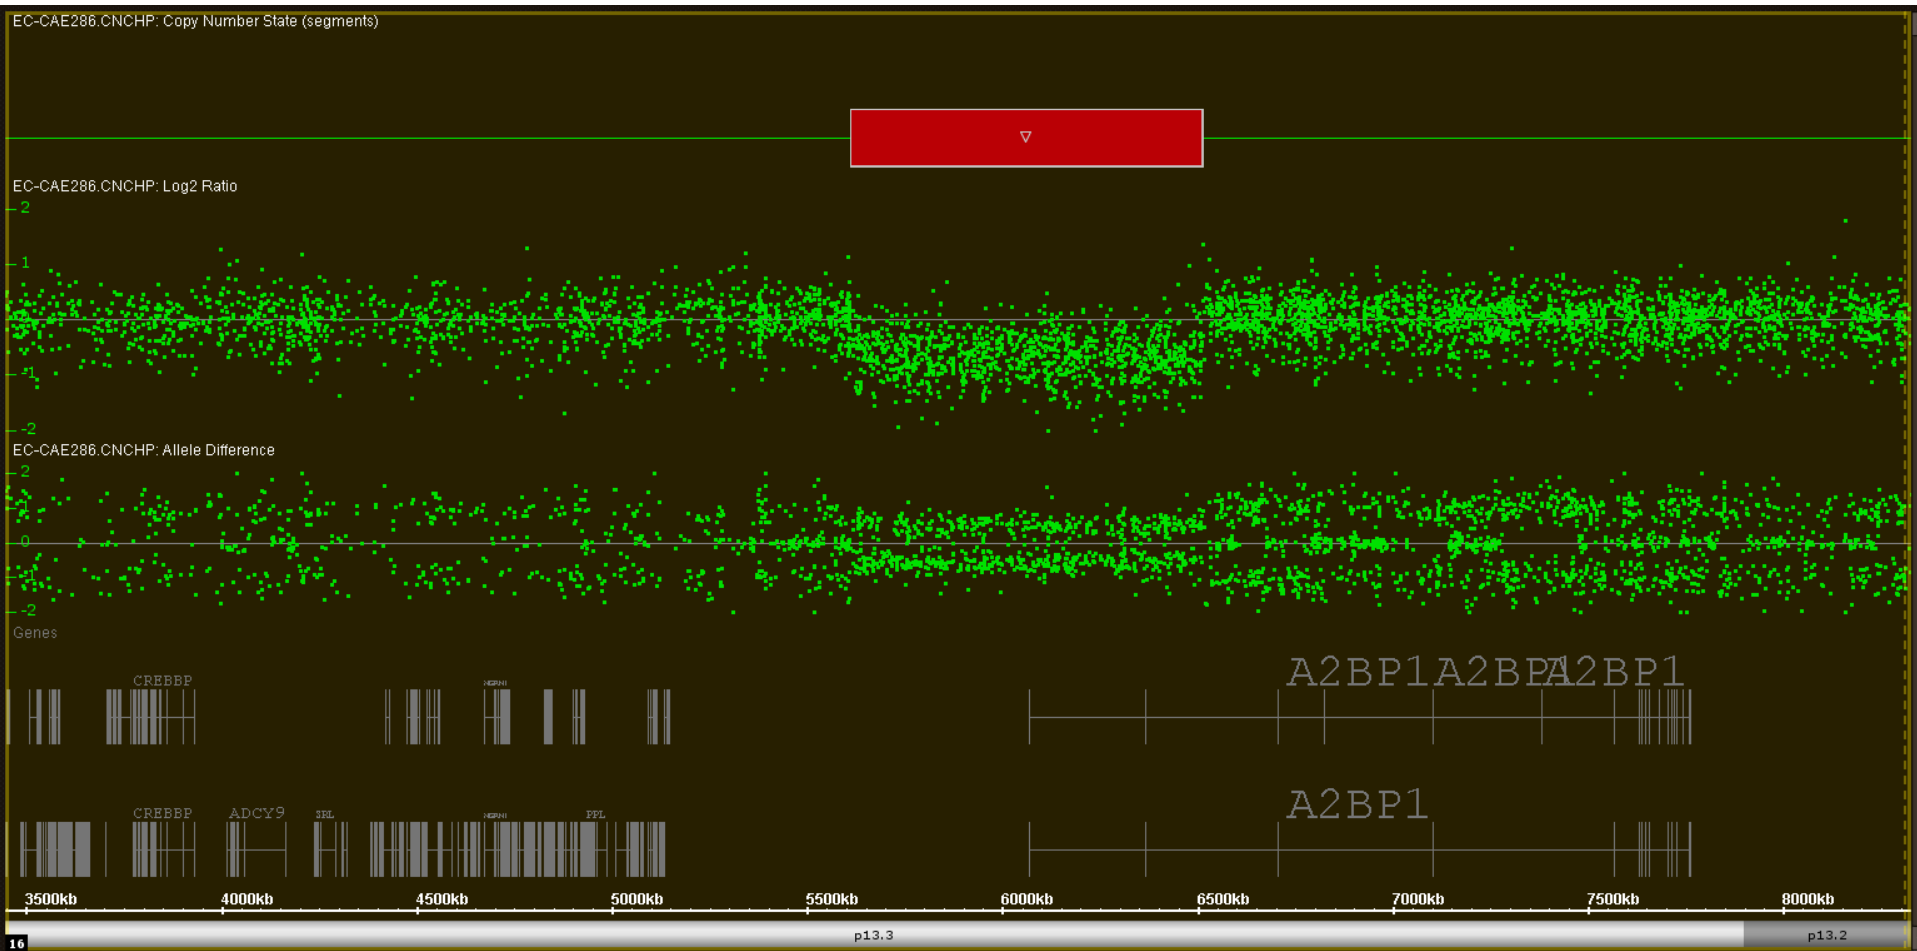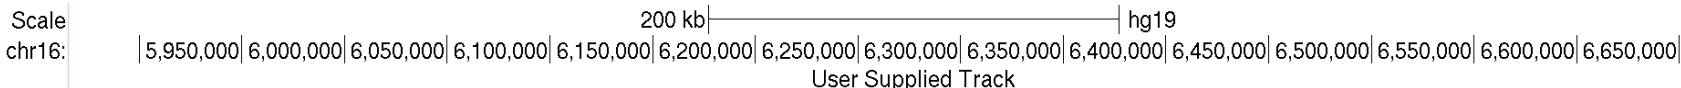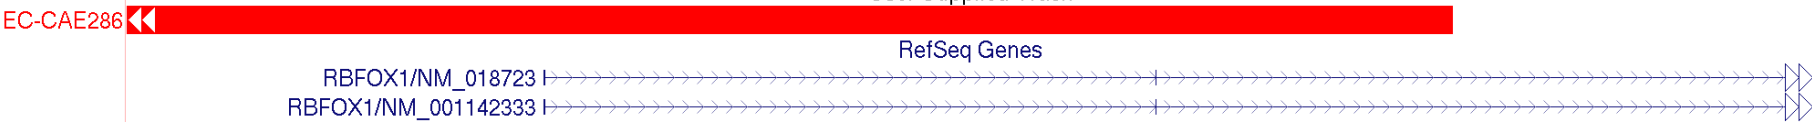

| Sample-ID | GGE Syndrome | Chr | Start    | End      | Candidate gene |
|-----------|--------------|-----|----------|----------|----------------|
| EC-CAE226 | 6/CAE,gsw    | 18  | 13982898 | 14969710 | ZNF519         |

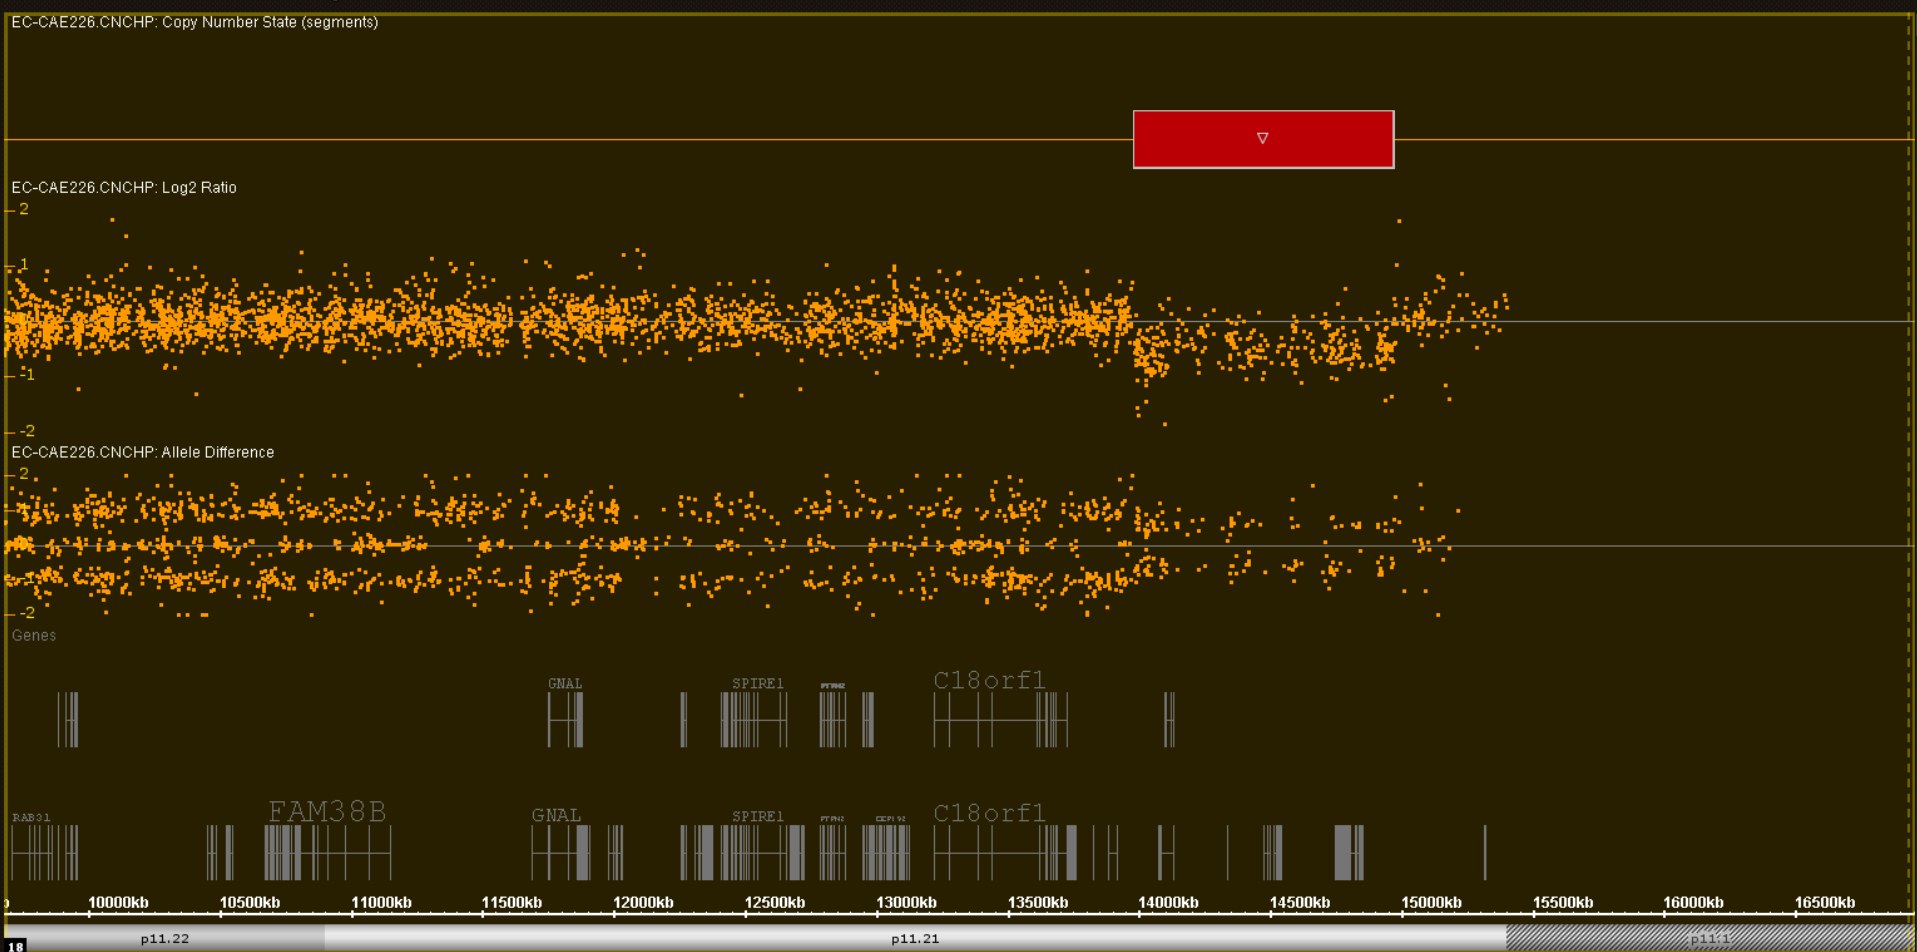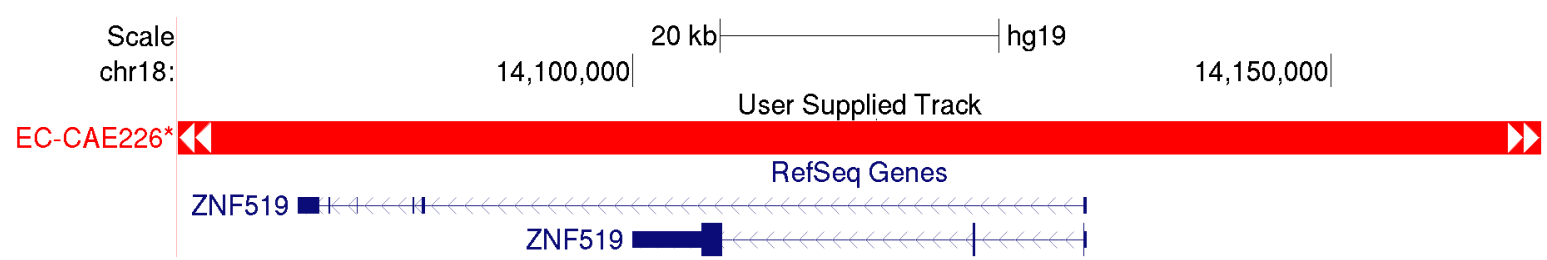



| Sample-ID | GGE Syndrome | Chr | Start   | End     | Candidate gene |
|-----------|--------------|-----|---------|---------|----------------|
| EC-CAE161 | 7/CAE,gsu    | 20  | 8099277 | 8572225 | <i>PLCB1</i>   |

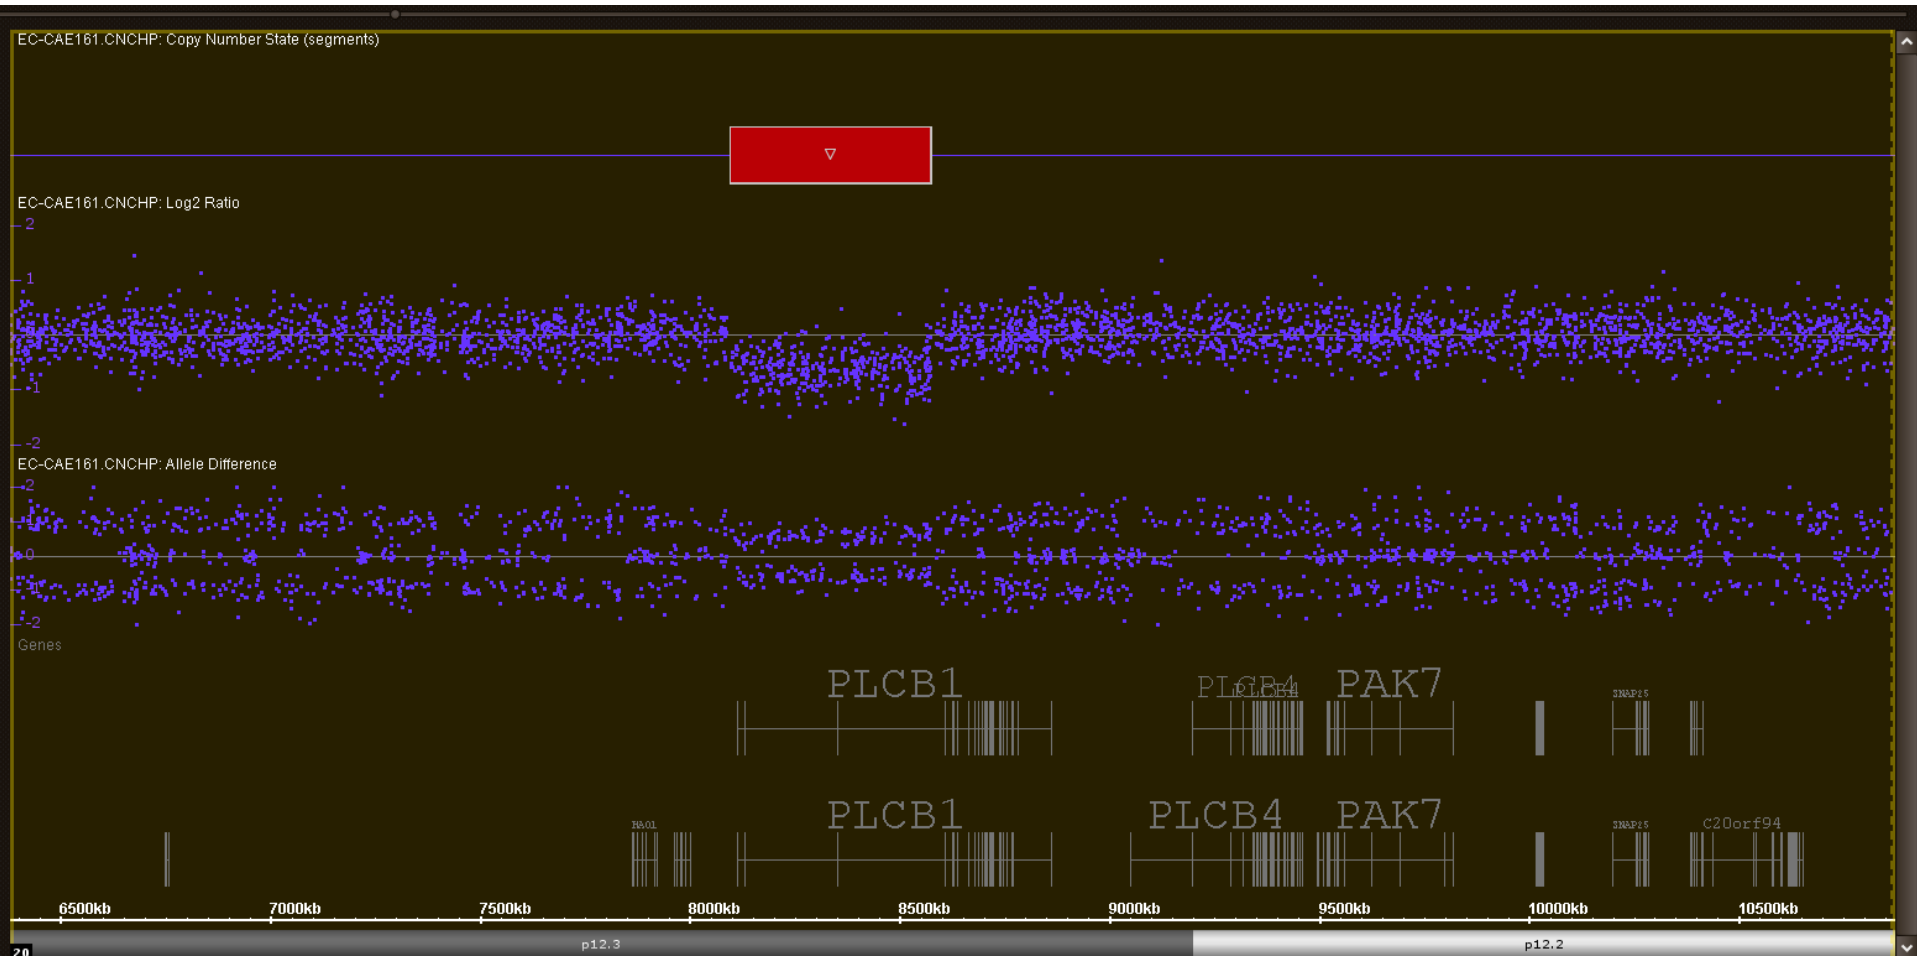

Scale  
chr20:

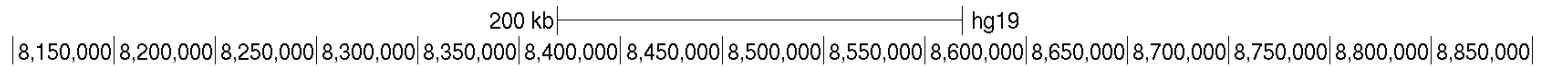

User Supplied Track

EC-CAE161

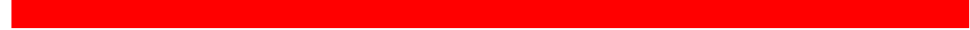

RefSeq Genes

PLCB1/NM\_015192  
PLCB1/NM\_182734

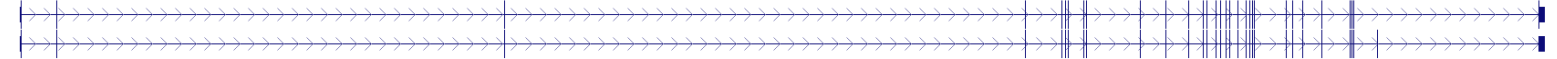

| Sample-ID   | GGE Syndrome | Chr | Start    | End      | Candidate gene |
|-------------|--------------|-----|----------|----------|----------------|
| EC-EGTCS119 | 15/EGTCS,gsw | 20  | 14902412 | 15312347 | MACROD2        |

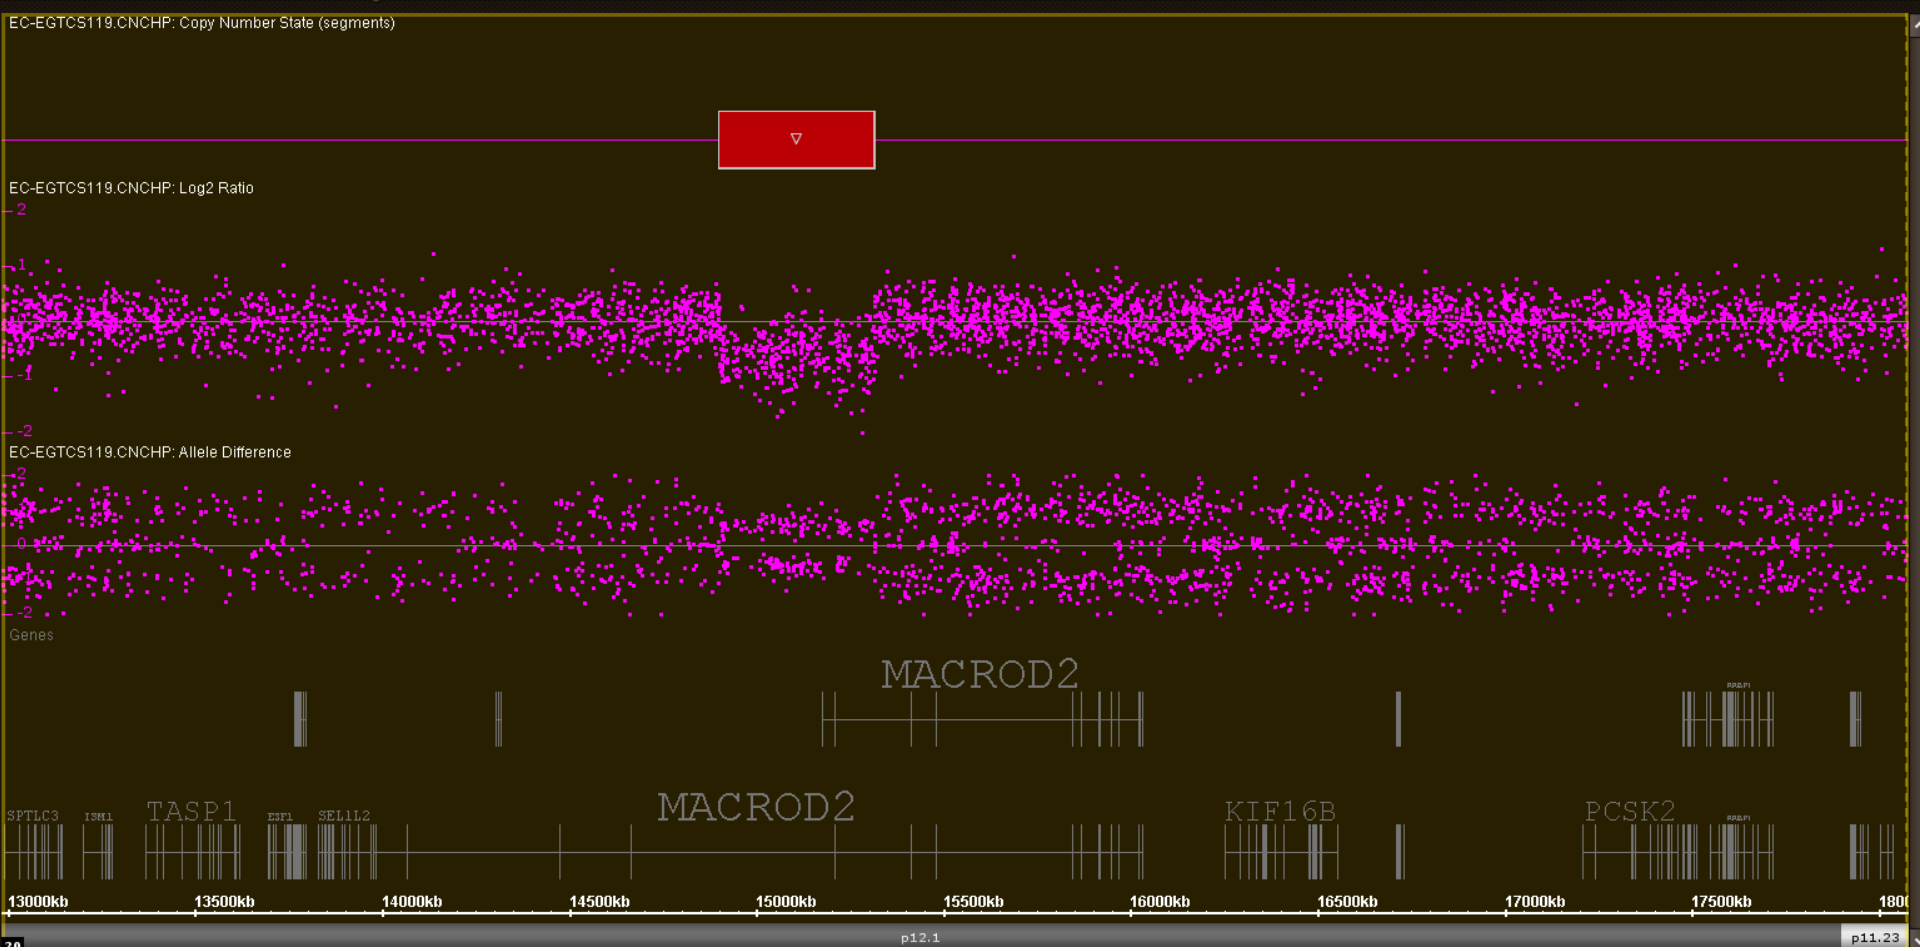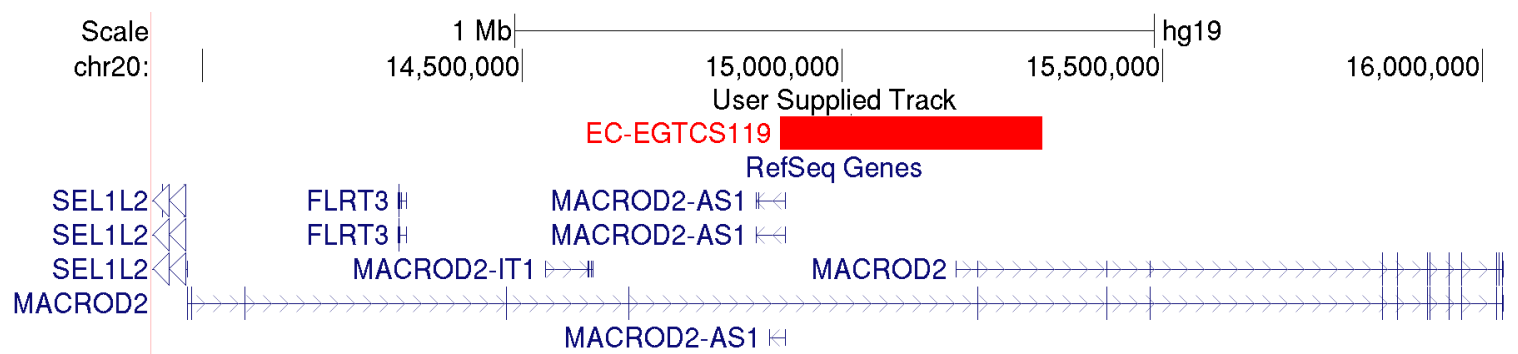

| Sample-ID | GGE Syndrome | Chr | Start    | End      | Candidate gene       |
|-----------|--------------|-----|----------|----------|----------------------|
| EC-JME101 | 24/JME       | 21  | 45866974 | 48096945 | <b>ADARB1, S100B</b> |

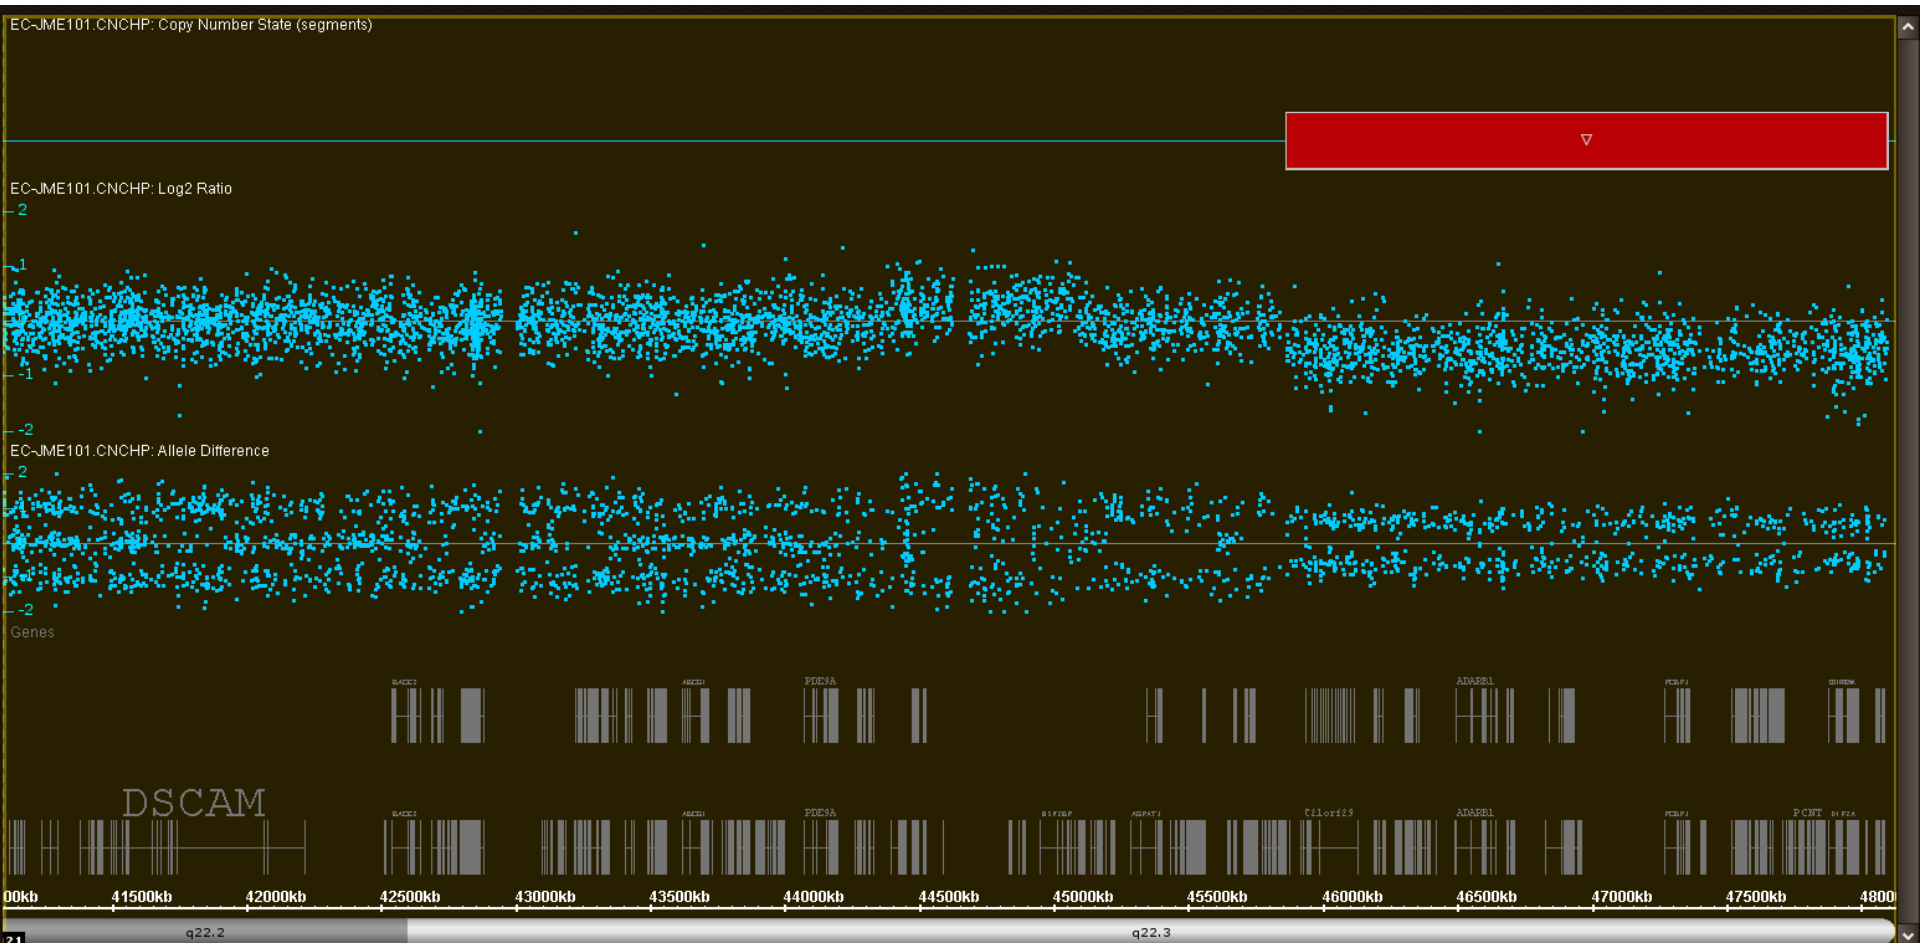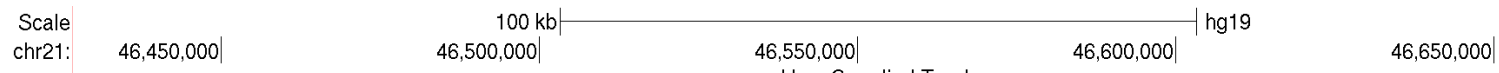

EC-JME101

RefSeq Genes

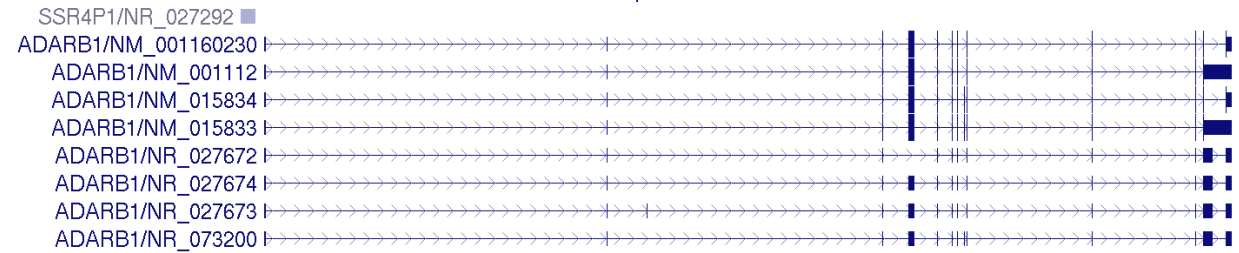

Supplement: pgen.1005226.s004.pdf [file pgen.1005226.s004.pdf]
