# Supplementary material for: Burden Analysis of Rare Microdeletions Suggests a Strong Impact of Neurodevelopmental Genes in Genetic Generalised Epilepsies
Source: PubMed Central journal article supplement (PMC4423931; doi:10.1371/journal.pgen.1005226), 2015-05-07

## Distribution of deletions in controls

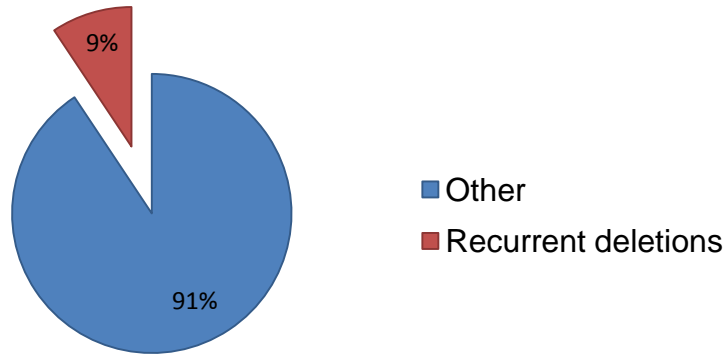

## Distribution of deletions in GGE patients

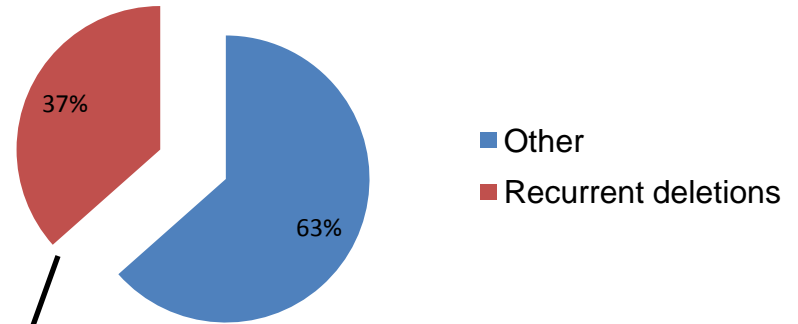

## Recurrent deletions in GGE patients

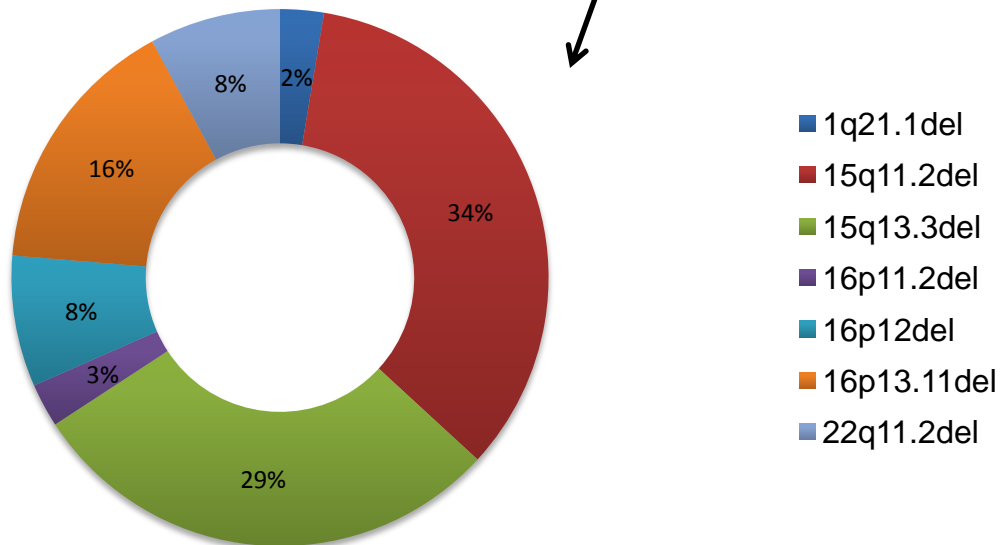

Supplement: pgen.1005226.s002.pdf [file pgen.1005226.s002.pdf]
