# Supplementary material for: Burden Analysis of Rare Microdeletions Suggests a Strong Impact of Neurodevelopmental Genes in Genetic Generalised Epilepsies
Source: PubMed Central journal article supplement (PMC4423931; doi:10.1371/journal.pgen.1005226), 2015-05-07

**S2 Fig. Genomic organisation of recurrent microdeletions at seven genomic rearrangement hotspots in patients with genetic generalised epilepsies and population controls**

**Microdeletions at 1q21.1**

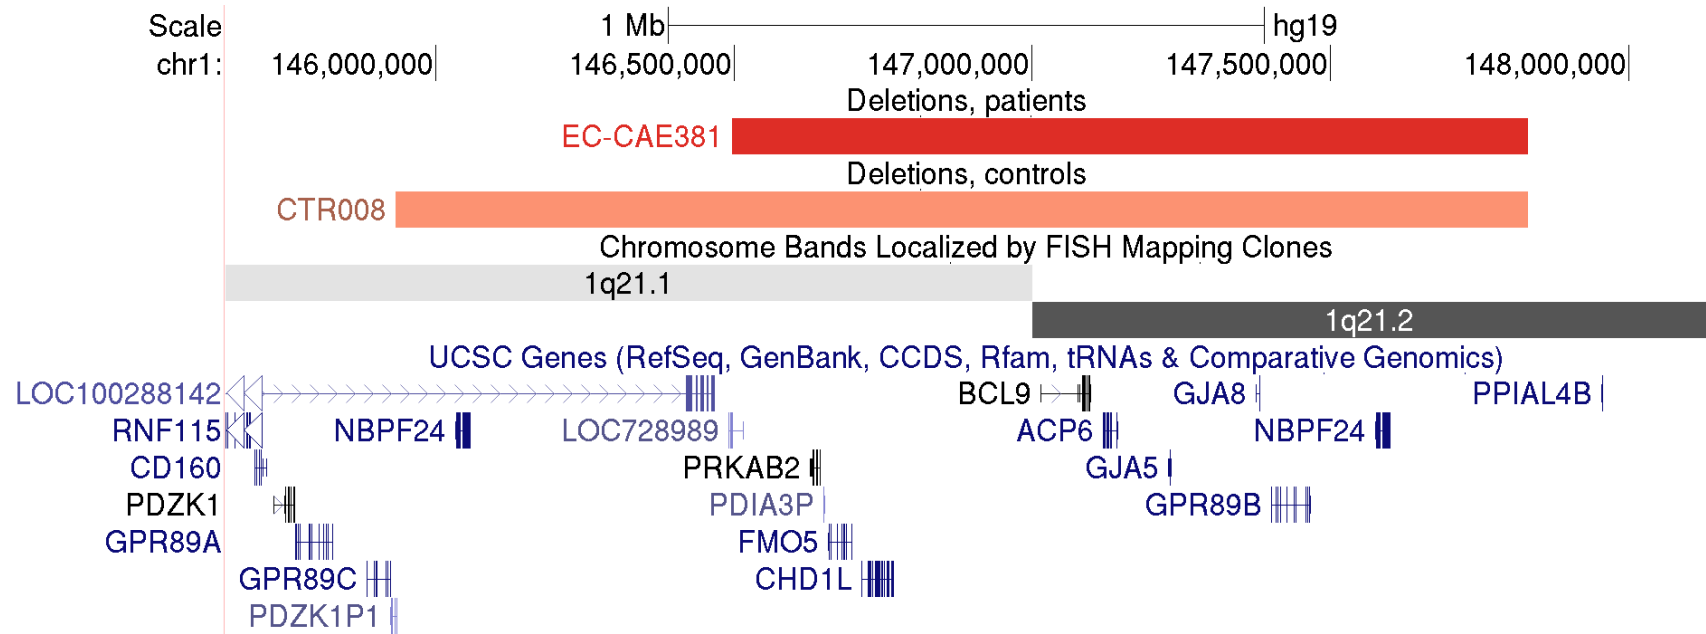

## Microdeletions at 15q11.2

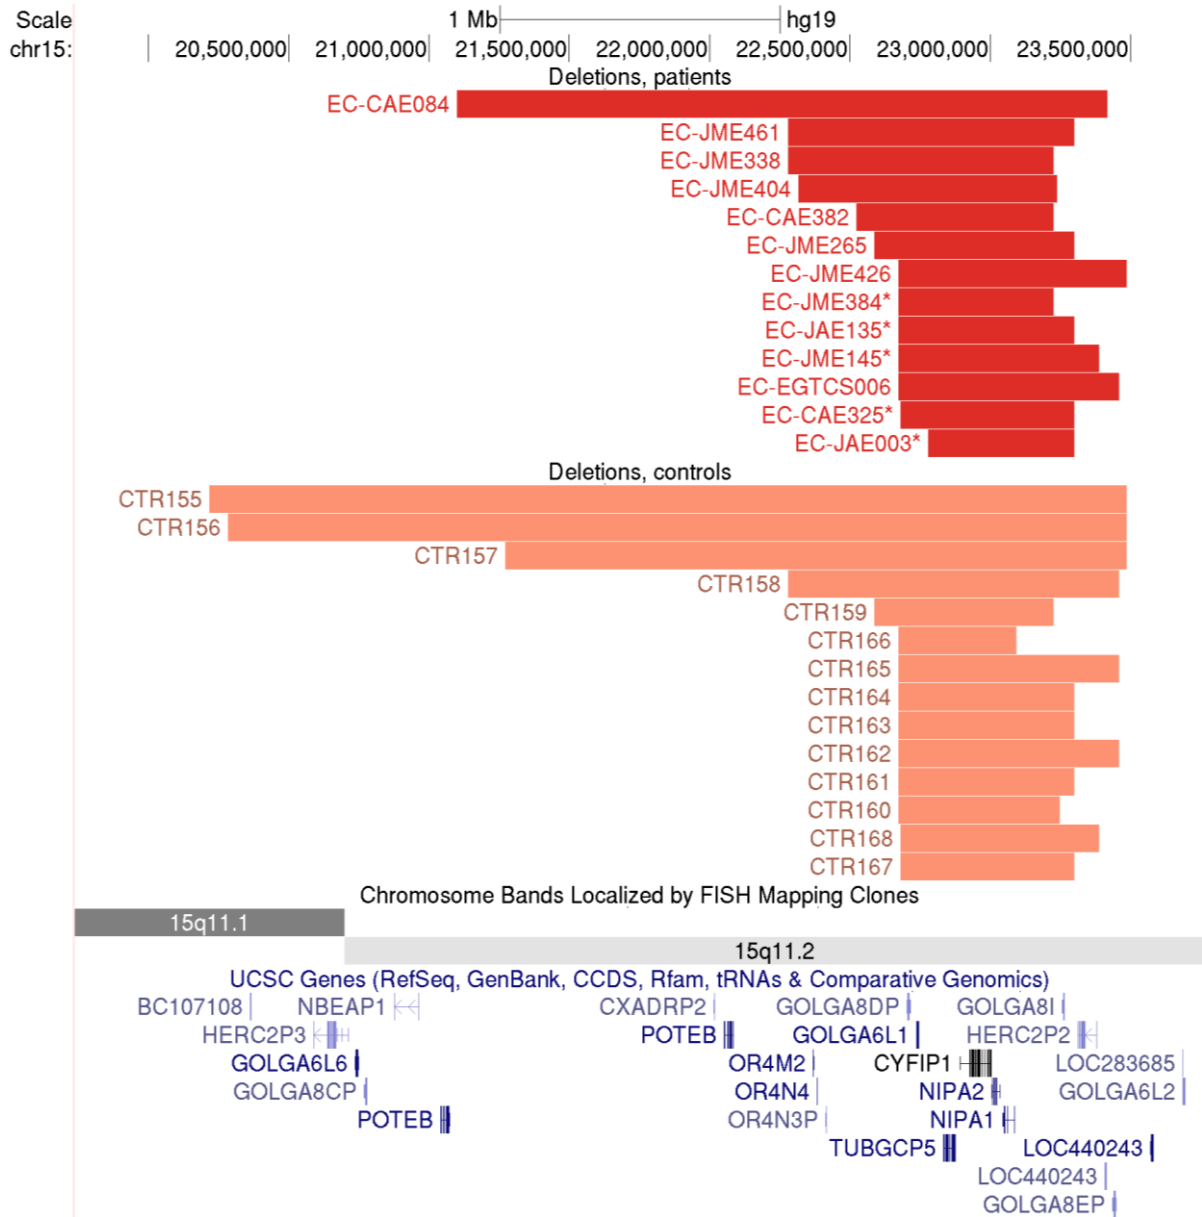

## Microdeletions at 15q13.3

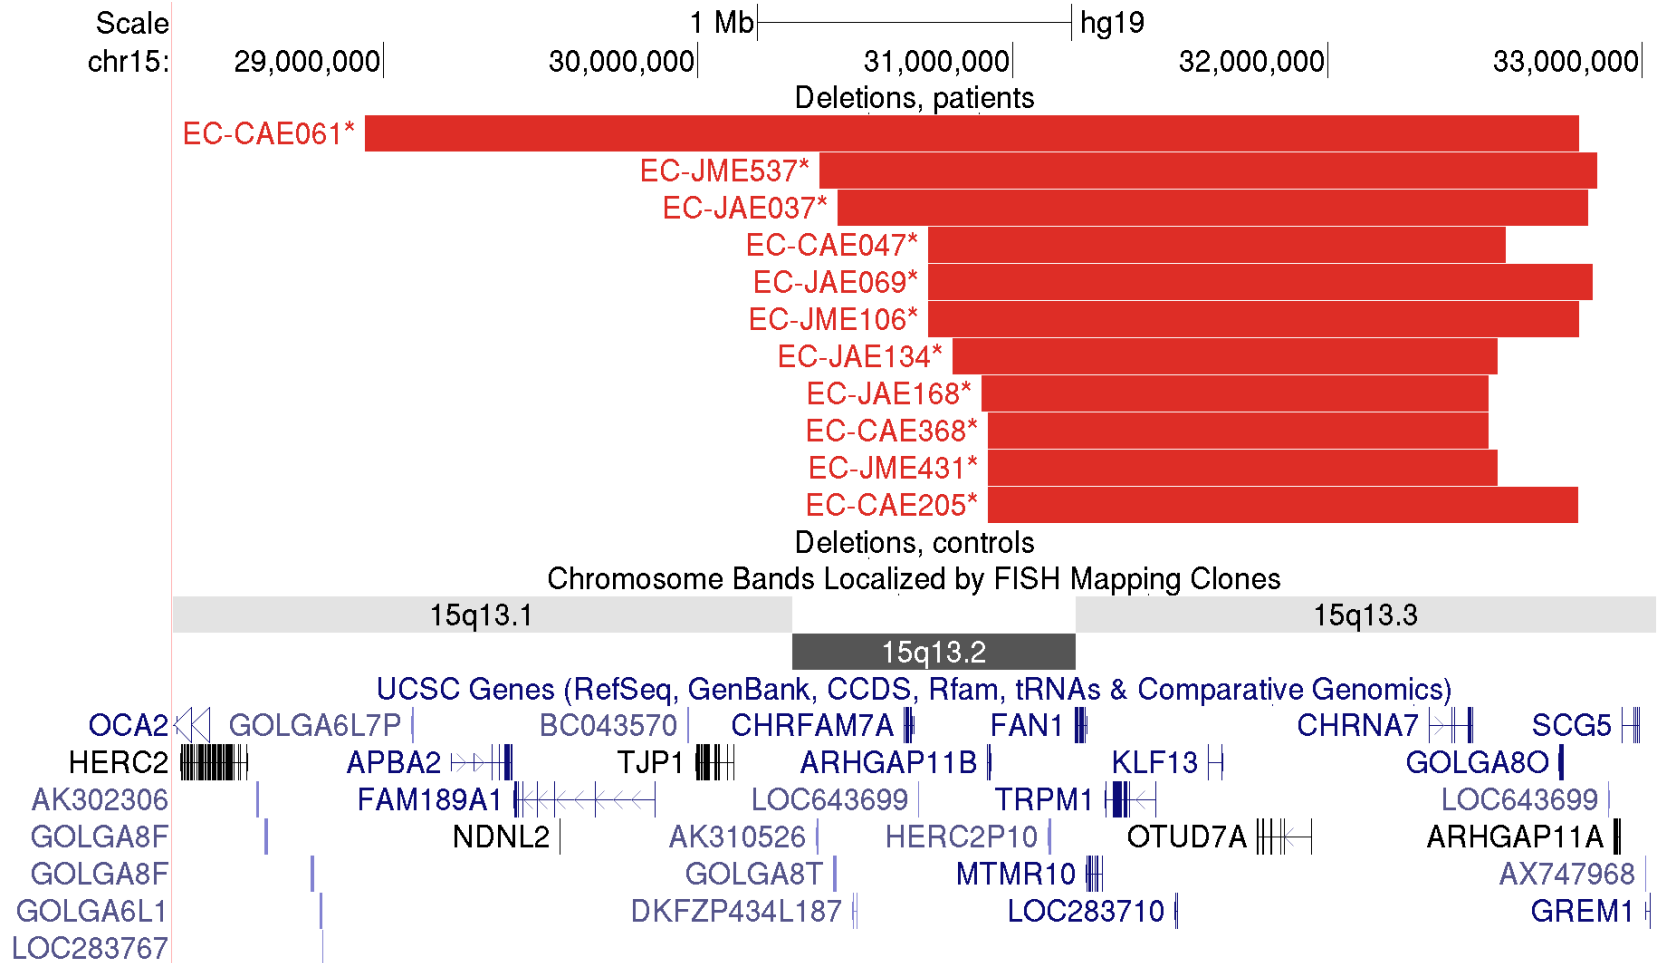

## Microdeletions at 16p11.2

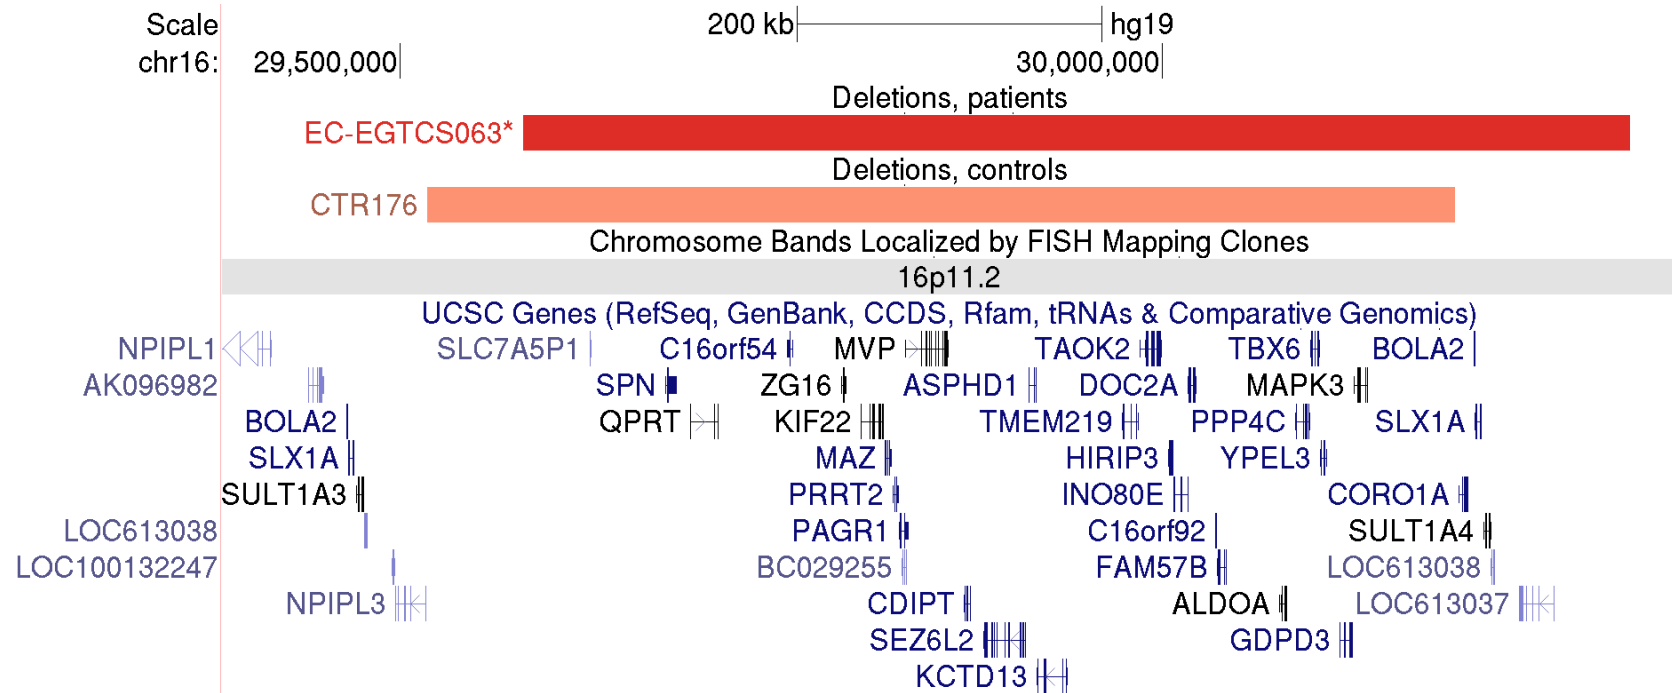

## Microdeletions at 16p12.2

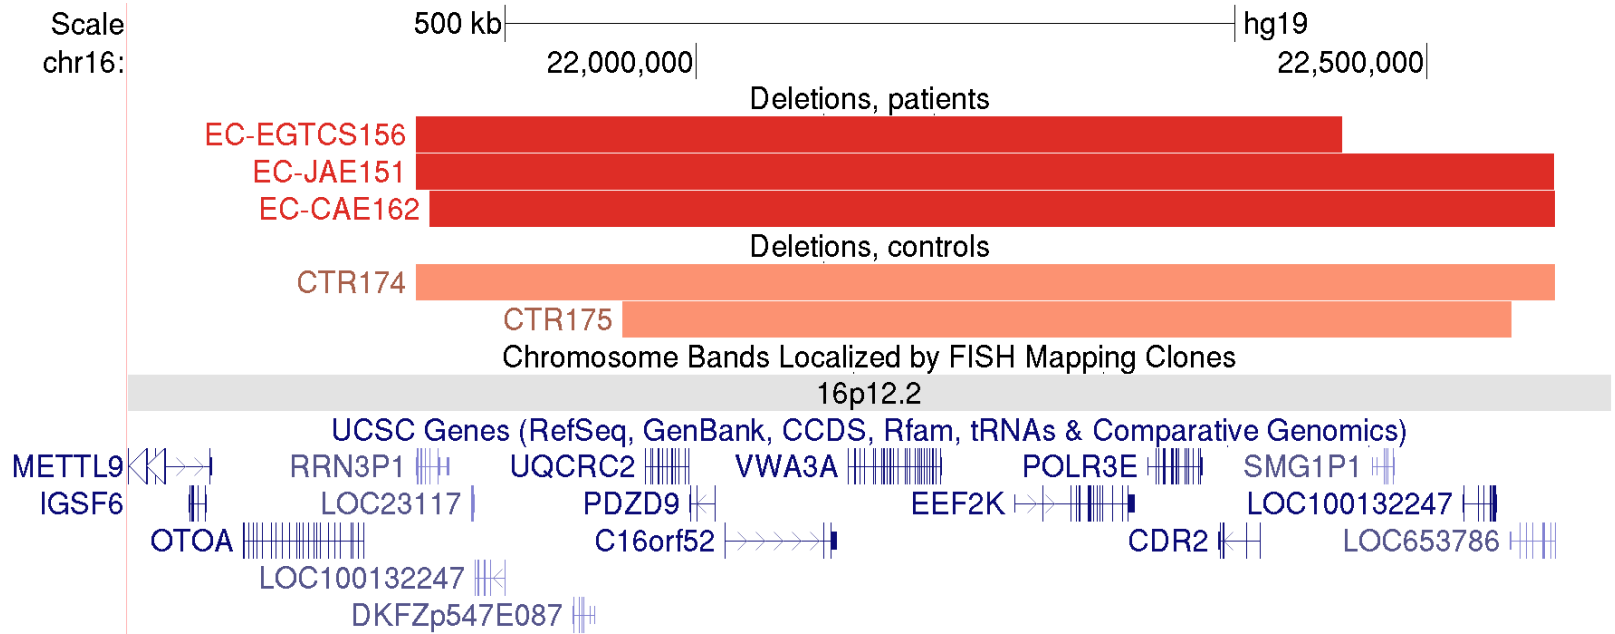

## Microdeletions at 16p13.3

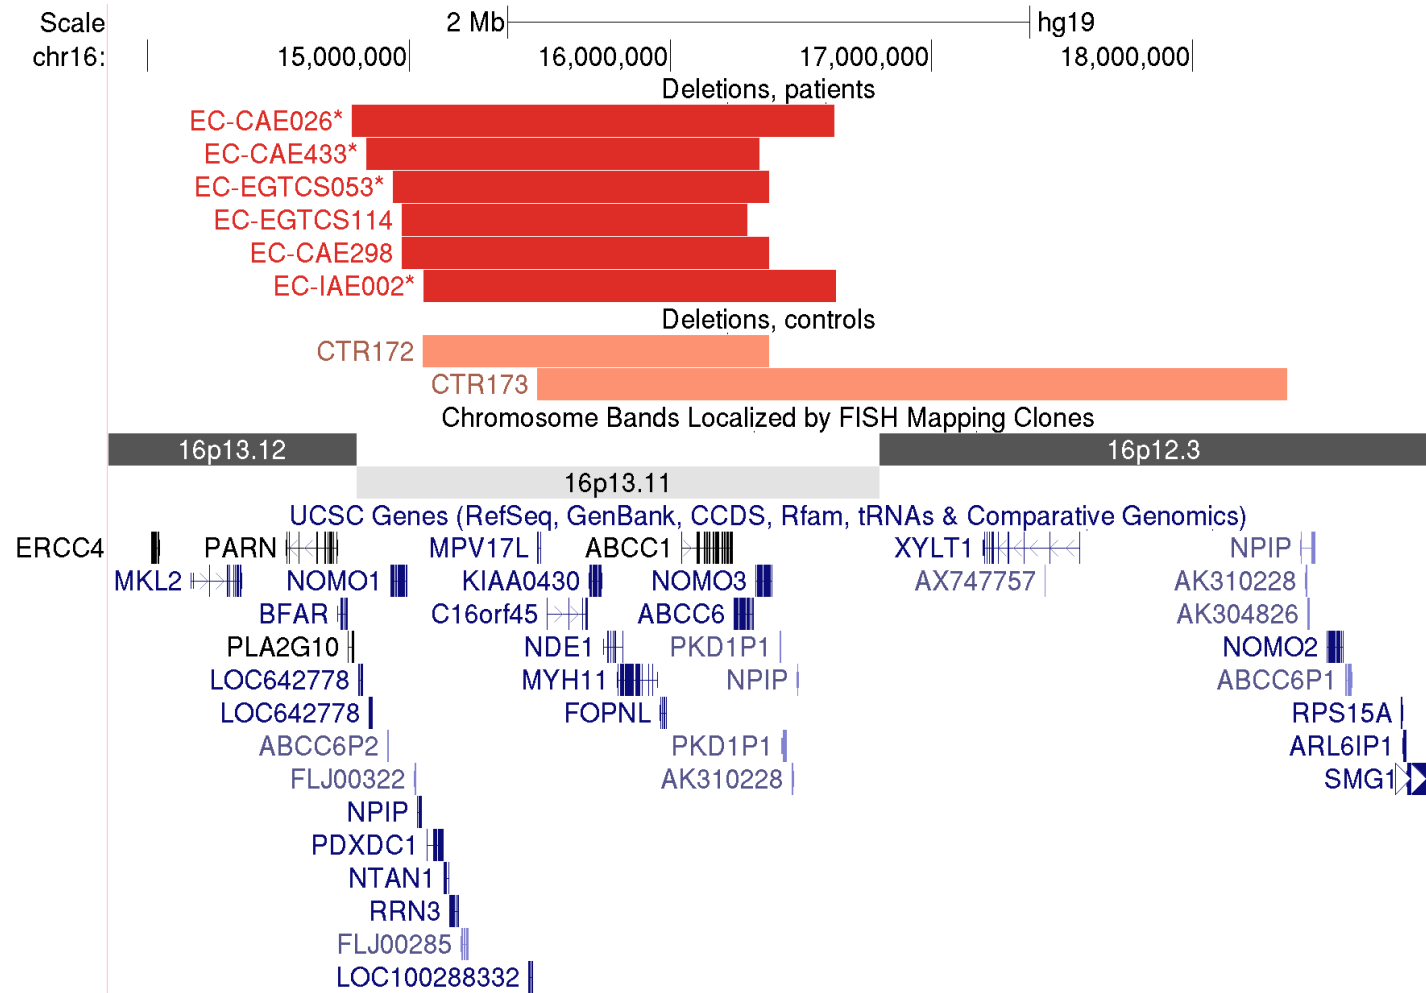

## Microdeletions at 22q11.2

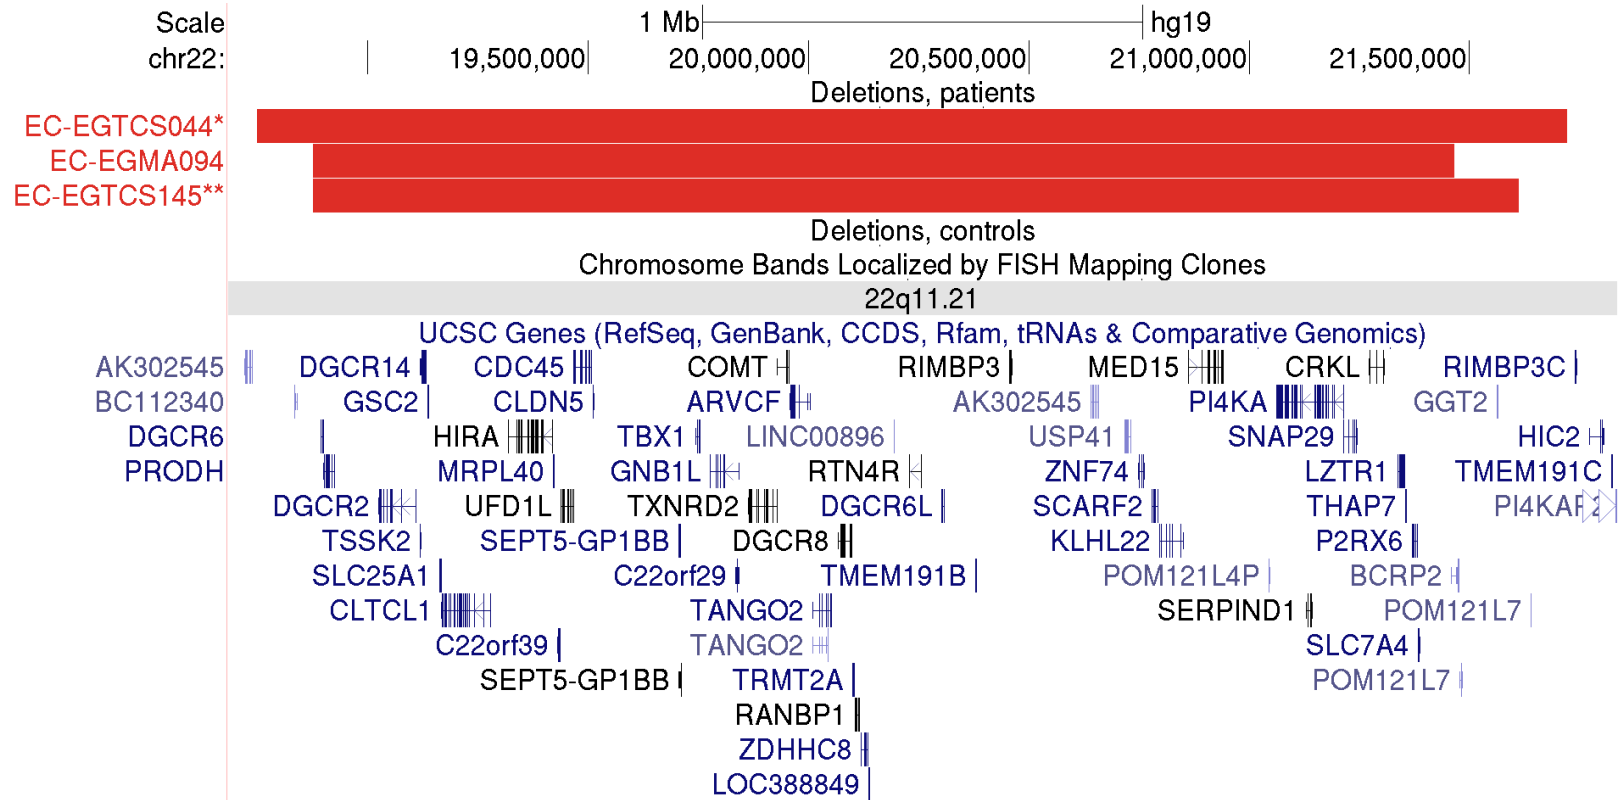

Supplement: pgen.1005226.s003.pdf [file pgen.1005226.s003.pdf]
