# Supplementary material for: Burden Analysis of Rare Microdeletions Suggests a Strong Impact of Neurodevelopmental Genes in Genetic Generalised Epilepsies
Source: PubMed Central journal article supplement (PMC4423931; doi:10.1371/journal.pgen.1005226), 2015-05-07

**S4 Fig. Protein-protein interaction networks (PPI) analysis of genes affected by large and rare microdeletions in patients with genetic generalised epilepsies**

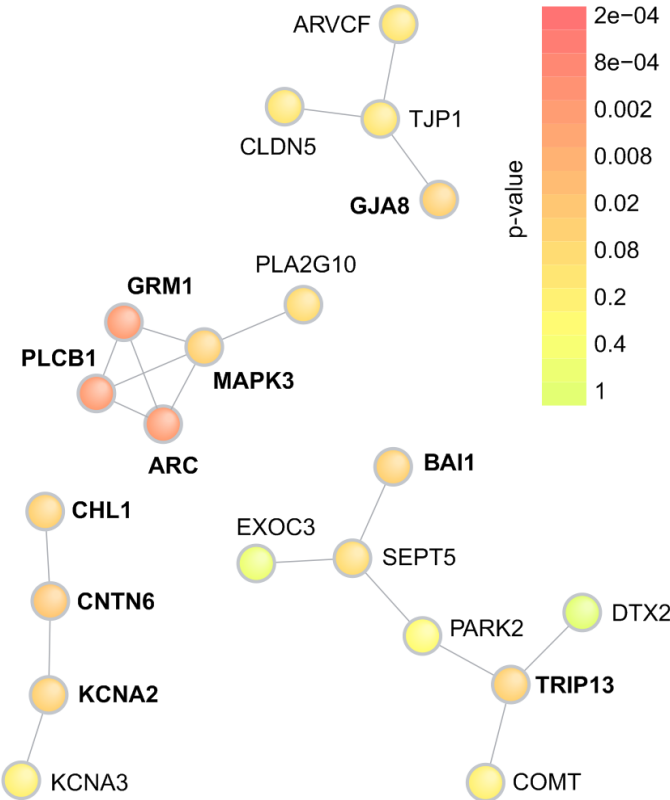

Supplement: pgen.1005226.s005.pdf [file pgen.1005226.s005.pdf]
